# Supplementary material for: Manganese-catalyzed asymmetric transfer hydrogenation of quinolines in water using ammonia borane as a hydrogen source
Source: Royal Society of Chemistry journal article supplement (doi:10.1039/d4gc00506f), 2024-01-01
Supplement: d4gc00506f1.pdf [file d4gc00506f1.pdf]

Electronic Supplementary Material (ESI) for Green Chem.  
This journal is © The Royal Society of Chemistry 2024

## *Supporting Information*

# **Manganese-Catalyzed Asymmetric Transfer Hydrogenation of Quinolines in Water using Ammonia Borane as a Hydrogen Source.**

Wenhao Mao,<sup>#</sup> Dingguo Song,<sup>#</sup> Jiyuan Guo, Kali Zhang, Changdi Zheng, Jie Lin,  
Lian Huang, Lizhou Zheng, Weihui Zhong\* and Fei Ling\*

College of Pharmaceutical Sciences, Zhejiang University of Technology, Hangzhou  
310014, P. R. China.

### **Table of Contents**

|                                                                 |     |
|-----------------------------------------------------------------|-----|
| 1. General experimental information                             | S1  |
| 2. General procedure for chiral benzimidazole ligands           | S1  |
| 3. General procedure for the preparation of substrates          | S2  |
| 4. General procedure for the ATH of quinolines                  | S3  |
| 5. General procedure for gram-scale synthesis of (-)-cuspareine | S17 |
| 6. Isotopic labelling experiments                               | S18 |
| 7. References                                                   | S19 |
| 8. Copies of NMR spectra                                        | S21 |
| 9. Copies of HPLC chart                                         | S61 |

## 1. General experimental information

Anhydrous toluene was distilled from sodium.  $\text{Mn}(\text{CO})_5\text{Br}$  and other chemical reagents were purchased from commercial suppliers.  $^1\text{H}$  NMR (600 MHz or 400MHz),  $^{13}\text{C}$  NMR (150 MHz or 100 MHz),  $^{19}\text{F}$  NMR (376 MHz) spectra were recorded on a Bruker ADVANCE III instruments in  $\text{CDCl}_3$  with TMS as internal standard.  $^1\text{H}$  NMR chemical shifts were referenced to Deuterium chloroform signal (7.26 ppm),  $^{13}\text{C}$  NMR chemical shifts were referenced to the solvent resonance (77.00 ppm,  $\text{CDCl}_3$ ). Optical rotations were determined using an AUTOPOL V polarimeter. HPLC analysis were performed using Agilent 1100 or Waters e2695 equipped with OJ-H, OD-H, IC-H, IJ-H and IA-H. HRMS spectra were recorded on an Agilent 1200HPLC-6210TOFMS using ESI as ion source. The conversion of starting materials was monitored by thin layer chromatography (TLC) using silica gel plates (silica gel 60 F254 0.25 mm), and components were visualized by observation under UV light (254 and 365 nm).

## 2. General procedure for chiral benzimidazole ligands

The aminobenzimidazole ligands **L1-L6** were prepared according to the reported method from the corresponding Boc-protected amino acids.<sup>1</sup>

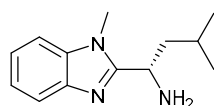

### (S)-3-methyl-1-(1-methyl-1H-benzo[d]imidazol-2-yl)butan-1-amine (**L1**) new

Yellow oil, 65% yield,  $[\alpha]_D^{20} = +43.6$  ( $c = 0.51$ ,  $\text{CHCl}_3$ ).  $^1\text{H}$  NMR (400 MHz,  $\text{CDCl}_3$ )  $\delta$  7.83 – 7.63 (m, 1H), 7.38 – 7.10 (m, 3H), 4.20 (t,  $J = 6.8$  Hz, 1H), 3.75 (s, 3H), 1.97 (s, 2H), 1.81 (dt,  $J = 13.2, 6.8$  Hz, 1H), 1.75 (dd,  $J = 6.8, 2.0$  Hz, 2H), 0.96 (dd,  $J = 6.4, 4.0$  Hz, 6H).  $^{13}\text{C}$  NMR (100 MHz,  $\text{CDCl}_3$ )  $\delta$  158.1, 142.0, 135.7, 122.1, 121.7, 119.1, 108.9, 46.8, 46.3, 29.6, 24.7, 23.0, 21.8. HRMS (ESI) calcd for  $\text{C}_{13}\text{H}_{19}\text{N}_3$   $[\text{M}+\text{H}]^+$ : 217.1579, found: 217.1583.

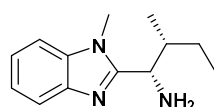

### (1S,2R)-2-methyl-1-(1-methyl-1H-benzo[d]imidazol-2-yl)butan-1-amine (**L6**) new

Yellow oil, 58% yield,  $[\alpha]_D^{20} = +10.6$  ( $c = 0.35$ ,  $\text{CHCl}_3$ ).  $^1\text{H}$  NMR (600 MHz,  $\text{CDCl}_3$ )  $\delta$  7.84 – 7.65 (m, 1H), 7.32 (d,  $J = 7.2$  Hz, 1H), 7.29 – 7.12 (m, 2H), 3.96 (dd,  $J = 7.2,$

1.8 Hz, 1H), 3.78 (s, 3H), 2.03 – 1.86 (m, 3H), 1.80 – 1.65 (m, 1H), 1.29 – 1.23 (m, 1H), 0.92 (t,  $J = 7.2$  Hz, 3H), 0.90 (d,  $J = 6.6$  Hz, 3H).  $^{13}\text{C}$  NMR (150 MHz,  $\text{CDCl}_3$ )  $\delta$  157.8, 142.2, 135.7, 122.2, 122.0, 119.3, 109.1, 53.7, 40.8, 30.0, 24.5, 16.1, 11.1. HRMS (ESI) calcd for  $\text{C}_{13}\text{H}_{19}\text{N}_3$   $[\text{M}+\text{H}]^+$ : 217.1579, found: 217.1575.

### 3. General procedure for the preparation of substrates

The substrates **1a-1j** and **1af** were purchased from commercial sources. The substrates **1n-1ab** were prepared according to the reported procedures.<sup>2</sup>

#### General procedure for the synthesis of 1k-1m:

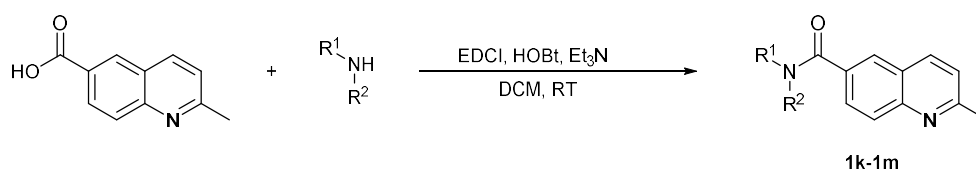

In a 50mL Schlenk flask, 2-methylquinoline-6-carboxylic acid (260 mg, 1.5 mmol) was dissolved in DCM (10 ml), HOBT (128 mg, 1.8 mmol) and EDCI (283 mg, 1.1 mmol) were added and the mixture was stirred 30 min at RT. Secondary amine (1.8 mmol) and  $\text{Et}_3\text{N}$  (333 mg, 2.2 mmol) were added dropwise and stirring was continued overnight. DCM (25 mL) was added. The organic phase was washed with aqueous sodium hydrogencarbonate (25 mL), aqueous sodium hydrogensulfate (25 mL) and water (25 mL). The organic phase was dried over  $\text{Na}_2\text{SO}_4$  and evaporated under vacuum. Finally, the residue was purified by column chromatography (ethyl acetate : petroleum ether =1:10 to 1:20).

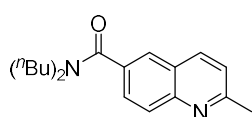

#### N,N-dibutyl-2-methylquinoline-6-carboxamide (**1k**):

Yellow oil, 62% yield.  $^1\text{H}$  NMR (600 MHz,  $\text{CDCl}_3$ )  $\delta$  8.04 (t,  $J = 9.6$  Hz, 2H), 7.79 (s, 1H), 7.66 (d,  $J = 8.4$  Hz, 1H), 7.32 (d,  $J = 8.4$  Hz, 1H), 3.39 (d,  $J = 180$  Hz, 4H), 2.75 (s, 3H), 1.60 (d,  $J = 107.4$  Hz, 4H), 1.47 – 1.06 (m, 4H), 0.87 (d,  $J = 153.6$  Hz, 6H).  $^{13}\text{C}$  NMR (150 MHz,  $\text{CDCl}_3$ )  $\delta$  170.9, 159.9, 147.6, 136.2, 134.5, 128.7, 127.5, 125.8, 125.6, 122.6, 48.7, 44.5, 30.7, 29.6, 25.3, 20.2, 19.6, 13.8, 13.4. HRMS (ESI) calcd for  $\text{C}_{19}\text{H}_{26}\text{N}_2\text{O}$   $[\text{M}+\text{H}]^+$ : 298.2045, found: 298.2040.

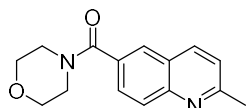

**(2-methylquinolin-6-yl)(morpholino)methanone (1l):**

White solid, 65% yield, m.p. 94.6-96.7 °C. <sup>1</sup>H NMR (600 MHz, CDCl<sub>3</sub>) δ 8.03 (dd, *J* = 13.8, 8.0 Hz, 2H), 7.85 (s, 1H), 7.66 (d, *J* = 8.4 Hz, 1H), 7.32 (d, *J* = 8.4 Hz, 1H), 3.71 (s, 8H), 2.74 (s, 3H). <sup>13</sup>C NMR (150 MHz, CDCl<sub>3</sub>) δ 169.8, 160.5, 148.0, 136.4, 132.5, 129.1, 127.7, 126.9, 125.9, 122.8, 66.8, 25.4. HRMS (ESI) calcd for C<sub>15</sub>H<sub>16</sub>N<sub>2</sub>O<sub>2</sub> [M+H]<sup>+</sup>: 256.1212, found: 256.1211.

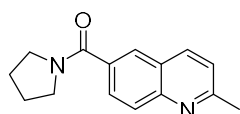

**(2-methylquinolin-6-yl)(pyrrolidin-1-yl)methanone (1m):**

White solid, 70% yield, m.p. 100.4-101.0 °C. <sup>1</sup>H NMR (600 MHz, CDCl<sub>3</sub>) δ 8.06 (d, *J* = 8.4 Hz, 1H), 8.03 (d, *J* = 8.4 Hz, 1H), 7.96 (s, 1H), 7.81 (d, *J* = 8.0 Hz, 1H), 7.32 (d, *J* = 8.4 Hz, 1H), 3.59 (d, *J* = 130.2 Hz, 4H), 2.76 (s, 3H), 2.34 – 1.47 (m, 4H). <sup>13</sup>C NMR (150 MHz, CDCl<sub>3</sub>) δ 169.0, 160.2, 148.0, 136.5, 134.4, 128.7, 127.9, 126.7, 125.7, 122.6, 49.6, 46.2, 26.4, 25.4, 24.4. HRMS (ESI) calcd for C<sub>15</sub>H<sub>16</sub>N<sub>2</sub>O [M+H]<sup>+</sup>: 240.1263, found: 240.1268.

#### 4. General procedure for the ATH of quinolines

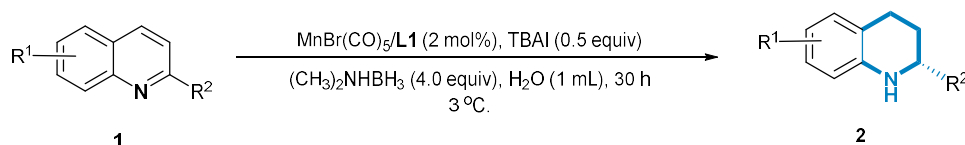

Under argon atmosphere, Mn(CO)<sub>5</sub>Br (0.02 mmol), **L1** (0.022 mmol), degassed toluene (2 mL) was added into tube and the mixture was heated to reflux for 3 h. The mixture was cooled to room temperature and concentrated to dryness, affording the crude Mn-**L1** complex. The Mn-**L1** complex, TBAI (0.1 mmol), **1** (0.2 mmol) and H<sub>2</sub>O (1.0 mL) were added in a 10 mL Schlenk flask. The mixture was stirred for 10 min at 3 °C. (CH<sub>3</sub>)<sub>2</sub>NHBH<sub>3</sub> was added and the mixture was stirred at 3 °C for 30 h. The solvent was removed, and the mixture was purified by passing through a short column of silica gel to afford the corresponding product. The absolute configurations of **2a–2h**, **2n–2r**, **2u–2w**, **2aa** were determined by the comparison with the reported optical rotation.<sup>2-5</sup>



The absolute configurations of **2i-2m**, **2s-2t**, **2x-2z**, **2ab-2ae** were tentatively assigned by analogy. The absolute configurations of **2af** is still unclear.

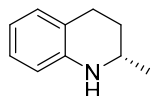

**(S)-2-methyl-1,2,3,4-tetrahydroquinoline (2a):**

Colorless oil, 85% yield, 89% *ee*;  $[\alpha]_{\text{D}}^{20} = -60.3$  ( $c = 1.23$ ,  $\text{CHCl}_3$ ); lit.<sup>2</sup>  $[\alpha]_{\text{D}}^{25} = -84.3$  [ $c = 1.42$ ,  $\text{CHCl}_3$ , 97% *ee* (S)]. The *ee* was determined by HPLC on Chiralpak OJ-H column, hexane: isopropanol = 90:10; flow rate = 0.8 mL/min; column temperature 25 °C; UV detection at 254 nm;  $t_{\text{R}1} = 15.30$  min (major),  $t_{\text{R}2} = 16.87$  min (minor). <sup>1</sup>H NMR (400 MHz,  $\text{CDCl}_3$ )  $\delta$  7.09 – 6.93 (m, 2H), 6.64 (td,  $J = 7.2, 1.2$  Hz, 1H), 6.50 (dd,  $J = 8.0, 1.2$  Hz, 1H), 3.62 – 3.24 (m, 1H), 3.05 – 2.82 (m, 1H), 2.80 – 2.73 (m, 1H), 2.05 – 1.88 (m, 1H), 1.68 – 1.56 (m, 1H), 1.24 (d,  $J = 6.4$  Hz, 3H). <sup>13</sup>C NMR (100 MHz,  $\text{CDCl}_3$ )  $\delta$  144.7, 129.2, 126.6, 121.0, 116.9, 114.0, 47.1, 30.1, 26.5, 22.5. HRMS (ESI) calcd for  $\text{C}_{10}\text{H}_{13}\text{N}$   $[\text{M}+\text{H}]^+$ : 147.1048, found: 147.1052.

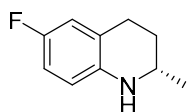

**(S)-6-fluoro-2-methyl-1,2,3,4-tetrahydroquinoline (2b):**

White solid, 88% yield, 89% *ee*, m.p. 46.8-48.3 °C;  $[\alpha]_{\text{D}}^{20} = -37.6$  ( $c = 0.62$ ,  $\text{CHCl}_3$ ); lit.<sup>2</sup>  $[\alpha]_{\text{D}}^{25} = -80.9$  [ $c = 1.22$ ,  $\text{CHCl}_3$ , 93% *ee* (S)]. The *ee* was determined by HPLC on Chiralpak OD-H column, hexane: isopropanol = 98:2; flow rate = 0.5 mL/min; column temperature 25 °C; UV detection at 254 nm;  $t_{\text{R}1} = 16.95$  min (minor),  $t_{\text{R}2} = 22.95$  min (major). <sup>1</sup>H NMR (400 MHz,  $\text{CDCl}_3$ )  $\delta$  6.89 – 6.62 (m, 2H), 6.48 – 6.33 (m, 1H), 3.38 – 3.31 (m, 1H), 2.87 – 2.78 (m, 1H), 2.73 – 2.67 (m, 1H), 1.95 – 1.89 (m, 1H), 1.61 – 1.51 (m, 1H), 1.21 (d,  $J = 6.0$  Hz, 3H). <sup>13</sup>C NMR (100 MHz,  $\text{CDCl}_3$ )  $\delta$  155.4 (d,  $J = 233.2$  Hz), 140.9 (d,  $J = 1.8$  Hz), 122.4 (d,  $J = 6.8$  Hz), 115.3 (d,  $J = 21.4$  Hz), 114.7 (d,  $J = 7.5$  Hz), 113.1 (d,  $J = 22.3$  Hz), 47.3, 29.8, 26.7 (d,  $J = 1.4$  Hz), 22.4. <sup>19</sup>F NMR (376 MHz,  $\text{CDCl}_3$ )  $\delta$  -128.27. HRMS (ESI) calcd for  $\text{C}_{10}\text{H}_{12}\text{FN}$   $[\text{M}+\text{H}]^+$ : 165.0954, found: 165.0962.

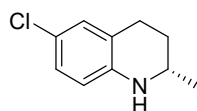

**(S)-6-chloro-2-methyl-1,2,3,4-tetrahydroquinoline (2c):**

Colorless oil, 92% yield, 90% *ee*;  $[\alpha]_{\text{D}}^{20} = -48.2$  ( $c = 0.62$ ,  $\text{CHCl}_3$ ); lit.<sup>3</sup>  $[\alpha]_{\text{D}}^{25} = +108.7$  [ $c = 1.0$ ,  $\text{CHCl}_3$ , 72% *ee* (R)]. The *ee* was determined by HPLC on Chiralpak OJ-H column, hexane: isopropanol = 90:10; flow rate = 0.8 mL/min; column temperature 25 °C; UV detection at 254 nm;  $t_{\text{R}1} = 12.98$  min (major),  $t_{\text{R}2} = 15.39$  min (minor). <sup>1</sup>H NMR (400 MHz,  $\text{CDCl}_3$ )  $\delta$  6.84 (d,  $J = 8.0$  Hz, 1H), 6.54 (dd,  $J = 8.0, 2.0$  Hz, 1H), 6.44 (d,  $J = 2.0$  Hz, 1H), 3.42 – 3.36 (m, 1H), 2.84 – 2.56 (m, 2H), 1.96 – 1.88 (m, 1H), 1.60 – 1.49 (m, 1H), 1.20 (d,  $J = 6.4$  Hz, 3H). <sup>13</sup>C NMR (100 MHz,  $\text{CDCl}_3$ )  $\delta$  145.7, 131.9, 130.1, 119.3, 116.6, 113.2, 47.0, 29.72, 26.0, 22.4. HRMS (ESI) calcd for  $\text{C}_{10}\text{H}_{12}\text{ClN}$   $[\text{M}+\text{H}]^+$ : 101.0658, found: 101.0666.

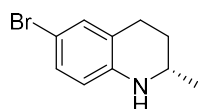

**(S)-6-bromo-2-methyl-1,2,3,4-tetrahydroquinoline (2d):**

White solid, 89% yield, 91% *ee*, m.p. 52.0-54.6 °C;  $[\alpha]_{\text{D}}^{20} = -28.6$  ( $c = 0.51$ ,  $\text{CHCl}_3$ ); lit.<sup>2</sup>  $[\alpha]_{\text{D}}^{25} = -61.6$  [ $c = 1.09$ ,  $\text{CHCl}_3$ , 97% *ee* (S)]. The *ee* was determined by HPLC on Chiralpak OJ-H column, hexane: isopropanol = 90:10; flow rate = 0.8 mL/min; column temperature 25 °C; UV detection at 254 nm;  $t_{\text{R}1} = 20.29$  min (major),  $t_{\text{R}2} = 32.96$  min (minor). <sup>1</sup>H NMR (400 MHz,  $\text{CDCl}_3$ )  $\delta$  7.09 – 6.98 (m, 2H), 6.34 (d,  $J = 8.4$  Hz, 1H), 3.37 (td,  $J = 6.4, 3.2$  Hz, 1H), 2.92 – 2.72 (m, 1H), 2.75 – 2.64 (m, 1H), 2.02 – 1.85 (m, 1H), 1.58 – 1.49 (m, 1H), 1.20 (d,  $J = 6.4$  Hz, 3H). <sup>13</sup>C NMR (100 MHz,  $\text{CDCl}_3$ )  $\delta$  143.7, 131.7, 129.3, 123.2, 115.4, 108.4, 47.1, 29.6, 26.4, 22.4. HRMS (ESI) calcd for  $\text{C}_{10}\text{H}_{12}\text{BrN}$   $[\text{M}+\text{H}]^+$ : 225.0153, found: 225.0148.

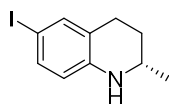

**(S)-6-iodo-2-methyl-1,2,3,4-tetrahydroquinoline (2e):**

White solid, 91% yield, 93% *ee*, m.p. 55.6-57.9 °C;  $[\alpha]_{\text{D}}^{20} = -50.3$  ( $c = 1.13$ ,  $\text{CHCl}_3$ ); lit.<sup>2</sup>  $[\alpha]_{\text{D}}^{25} = -56.2$  [ $c = 1.14$ ,  $\text{CHCl}_3$ , 94% *ee* (S)]. The *ee* was determined by HPLC on Chiralpak OJ-H column, hexane: isopropanol = 90:10; flow rate = 0.8 mL/min; column temperature 25 °C; UV detection at 254 nm;  $t_{\text{R}1} = 15.13$  min (major),  $t_{\text{R}2} = 18.90$  min (minor). <sup>1</sup>H NMR (600 MHz,  $\text{CDCl}_3$ )  $\delta$  7.24 (s, 1H), 7.20 (dd,  $J = 8.4, 2.4$  Hz, 1H), 6.24 (d,  $J = 8.4$  Hz, 1H), 3.73 (s, 1H), 3.40 – 3.36 (m, 1H), 2.88 – 2.74 (m, 1H), 2.70 –

2.65 (m, 1H), 1.93 – 1.88 (m, 1H), 1.57 – 1.50 (m, 1H), 1.20 (d,  $J = 6.0$  Hz, 3H).  $^{13}\text{C}$  NMR (150 MHz,  $\text{CDCl}_3$ )  $\delta$  144.3, 137.4, 135.1, 123.7, 115.9, 47.0, 29.5, 26.2, 22.4. HRMS (ESI) calcd for  $\text{C}_{10}\text{H}_{12}\text{IN}$   $[\text{M}+\text{H}]^+$ : 273.0014, found: 273.0016.

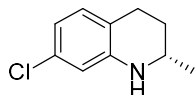

**(S)-7-chloro-2-methyl-1,2,3,4-tetrahydroquinoline (2f):**

White solid, 97% yield, 93% *ee*, m.p. 51.3–52.7 °C;  $[\alpha]_{\text{D}}^{20} = -36.7$  ( $c = 0.68$ ,  $\text{CHCl}_3$ ); lit.<sup>2</sup>  $[\alpha]_{\text{D}}^{25} = -74.4$  [ $c = 0.90$ ,  $\text{CHCl}_3$ , 92% *ee* (S)]. The *ee* was determined by HPLC on Chiralpak OJ-H column, hexane: isopropanol = 90:10; flow rate = 0.8 mL/min; column temperature 25 °C; UV detection at 254 nm;  $t_{\text{R}1} = 39.80$  min (major),  $t_{\text{R}2} = 45.27$  min (minor).  $^1\text{H}$  NMR (600 MHz,  $\text{CDCl}_3$ )  $\delta$  6.86 (d,  $J = 7.8$  Hz, 1H), 6.55 (dd,  $J = 8.4, 2.4$  Hz, 1H), 6.44 (d,  $J = 2.4$  Hz, 1H), 3.76 (s, 1H), 3.41 – 3.37 (m, 1H), 2.79 – 2.73 (m, 1H), 2.72 – 2.51 (m, 1H), 1.98 – 1.85 (m, 1H), 1.59 – 1.51 (m, 1H), 1.21 (d,  $J = 6.0$  Hz, 3H).  $^{13}\text{C}$  NMR (150 MHz,  $\text{CDCl}_3$ )  $\delta$  145.7, 131.8, 130.1, 119.2, 116.5, 113.2, 46.9, 29.7, 26.0, 22.4. HRMS (ESI) calcd for  $\text{C}_{10}\text{H}_{12}\text{ClN}$   $[\text{M}+\text{H}]^+$ : 181.0658, found: 181.0667.

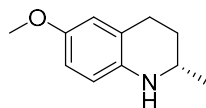

**(S)-6-methoxy-2-methyl-1,2,3,4-tetrahydroquinoline (2g):**

Yellow oil, 86% yield, 78% *ee*;  $[\alpha]_{\text{D}}^{20} = -28.1$  ( $c = 0.58$ ,  $\text{CHCl}_3$ ); lit.<sup>2</sup>  $[\alpha]_{\text{D}}^{25} = -60.7$  [ $c = 1.21$ ,  $\text{CHCl}_3$ , 93% *ee* (S)]. The *ee* was determined by HPLC on Chiralpak OD-H column, hexane: isopropanol = 98:2; flow rate = 0.5 mL/min; column temperature 25 °C; UV detection at 254 nm;  $t_{\text{R}1} = 20.89$  min (minor),  $t_{\text{R}2} = 25.07$  min (major).  $^1\text{H}$  NMR (400 MHz,  $\text{CDCl}_3$ )  $\delta$  6.74 – 6.55 (m, 2H), 6.46 (d,  $J = 8.4$  Hz, 1H), 3.74 (s, 3H), 3.38 – 3.30 (m, 1H), 3.17 (s, 1H), 2.91 – 2.80 (m, 1H), 2.76 – 2.69 (m, 1H), 1.96 – 1.88 (m, 1H), 1.64 – 1.53 (m, 1H), 1.21 (d,  $J = 6.4$  Hz, 3H).  $^{13}\text{C}$  NMR (100 MHz,  $\text{CDCl}_3$ )  $\delta$  151.7, 138.8, 122.4, 115.2, 114.5, 112.7, 55.7, 47.4, 30.2, 26.8, 22.4. HRMS (ESI) calcd for  $\text{C}_{11}\text{H}_{15}\text{NO}$   $[\text{M}+\text{H}]^+$ : 177.1154, found: 177.1159.

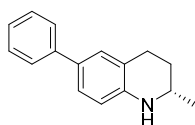

**(S)-2-methyl-6-phenyl-1,2,3,4-tetrahydroquinoline (2h):**

Yellow oil, 88% yield, 91% *ee*;  $[\alpha]_D^{20} = -60.3$  ( $c = 1.08$ ,  $\text{CHCl}_3$ ); lit.<sup>4</sup>  $[\alpha]_D^{20} = -70.3$  [ $c = 1.26$ ,  $\text{CHCl}_3$ , 95% *ee* (S)]. The *ee* was determined by HPLC on Chiralpak OJ-H column, hexane: isopropanol = 90:10; flow rate = 0.8 mL/min; column temperature 25 °C; UV detection at 254 nm;  $t_{R1} = 53.89$  min (minor),  $t_{R2} = 55.87$  min (major). <sup>1</sup>H NMR (400 MHz,  $\text{CDCl}_3$ )  $\delta$  7.58 (dd,  $J = 8.4, 1.2$  Hz, 2H), 7.43 (t,  $J = 8.0$  Hz, 2H), 7.33 – 7.27 (m, 3H), 6.58 (d,  $J = 9.6$  Hz, 1H), 3.50 – 3.45 (m, 1H), 3.13 – 2.89 (m, 1H), 2.87 – 2.81 (m, 1H), 2.20 – 1.95 (m, 1H), 1.72 – 1.62 (m, 1H), 1.27 (d,  $J = 6.4$  Hz, 3H). <sup>13</sup>C NMR (100 MHz,  $\text{CDCl}_3$ )  $\delta$  144.2, 141.4, 129.9, 128.5, 127.9, 126.2, 125.8, 125.4, 121.2, 114.2, 47.2, 30.0, 26.6, 22.5. HRMS (ESI) calcd for  $\text{C}_{16}\text{H}_{17}\text{N}$   $[\text{M}+\text{H}]^+$ : 223.1361, found:223.1366.

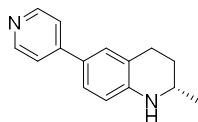

**(S)-2-methyl-6-(pyridin-4-yl)-1,2,3,4-tetrahydroquinoline (2i):**

Yellow oil, 70% yield, 94% *ee*;  $[\alpha]_D^{20} = -73.2$  ( $c = 1.21$ ,  $\text{CHCl}_3$ ). The *ee* was determined by HPLC on Chiralpak IC-H column, hexane: isopropanol = 90:10; flow rate = 0.8 mL/min; column temperature 25 °C; UV detection at 254 nm;  $t_{R1} = 30.20$  min (minor),  $t_{R2} = 32.35$  min (major). <sup>1</sup>H NMR (600 MHz,  $\text{CDCl}_3$ )  $\delta$  8.54 (d,  $J = 4.8$  Hz, 2H), 7.43 (d,  $J = 4.8$  Hz, 2H), 7.31 (d,  $J = 6.6$  Hz, 2H), 6.53 (d,  $J = 8.4$  Hz, 1H), 3.96 (s, 1H), 3.60 – 3.31 (m, 1H), 2.88 (td,  $J = 10.8, 5.4$  Hz, 1H), 2.81 (dt,  $J = 16.2, 4.8$  Hz, 1H), 2.00 – 1.96 (m, 1H), 1.69 – 1.53 (m, 1H), 1.25 (d,  $J = 6.4$  Hz, 3H). <sup>13</sup>C NMR (150 MHz,  $\text{CDCl}_3$ )  $\delta$  149.9, 148.4, 145.9, 127.8, 125.8, 125.4, 121.2, 120.3, 114.1, 47.2, 29.8, 26.6, 22.5. HRMS (ESI) calcd for  $\text{C}_{15}\text{H}_{16}\text{N}_2$   $[\text{M}+\text{H}]^+$ : 224.1313, found: 224.1305.

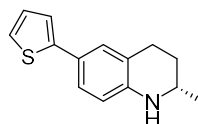

**(S)-2-methyl-6-(thiophen-2-yl)-1,2,3,4-tetrahydroquinoline (2j):**

Colorless oil, 86% yield, 92% *ee*;  $[\alpha]_D^{20} = -70.3$  ( $c = 1.06$ ,  $\text{CHCl}_3$ ). The *ee* was determined by HPLC on Chiralpak IJ-H column, hexane: isopropanol = 90:10; flow rate = 0.8 mL/min; column temperature 25 °C; UV detection at 254 nm;  $t_{R1} = 64.52$  min (minor),  $t_{R2} = 78.21$  min (major). <sup>1</sup>H NMR (600 MHz,  $\text{CDCl}_3$ )  $\delta$  7.25 (d,  $J = 7.8$  Hz, 2H), 7.14 (dd,  $J = 9.0, 4.8$  Hz, 2H), 7.05 – 7.00 (m, 1H), 6.48 (d,  $J = 7.2$  Hz, 1H), 3.80 (s, 1H), 3.52 – 3.34 (m, 1H), 2.91 – 2.85 (m, 1H), 2.79 (dt,  $J = 16.2, 4.8$  Hz, 1H), 2.06

– 1.86 (m, 1H), 1.73 – 1.51 (m, 1H), 1.24 (d,  $J = 6.6$  Hz, 3H).  $^{13}\text{C}$  NMR (150 MHz,  $\text{CDCl}_3$ )  $\delta$  145.5, 144.4, 127.7, 127.0, 124.7, 123.5, 122.5, 121.1, 120.7, 114.0, 47.2, 30.0, 26.5, 22.5. HRMS (ESI) calcd for  $\text{C}_{14}\text{H}_{15}\text{NS}$   $[\text{M}+\text{H}]^+$ : 229.0925, found: 229.0920.

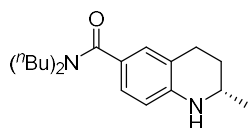

**(S)-N,N-dibutyl-2-methyl-1,2,3,4-tetrahydroquinoline-6-carboxamide (2k):**

Colorless oil, 80% yield, 90% *ee*;  $[\alpha]_D^{20} = -56.2$  ( $c = 0.86$ ,  $\text{CHCl}_3$ ). The *ee* was determined by HPLC on Chiralpak OD-H column, hexane: isopropanol = 95:5; flow rate = 0.6 mL/min; column temperature 25 °C; UV detection at 254 nm;  $t_{R1} = 71.48$  min (minor),  $t_{R2} = 75.53$  min (major).  $^1\text{H}$  NMR (600 MHz,  $\text{CDCl}_3$ )  $\delta$  6.95 (s, 1H), 6.91 (d,  $J = 8.4$  Hz, 1H), 6.32 (d,  $J = 8.4$  Hz, 1H), 4.08 (s, 1H), 3.44 – 3.09 (m, 5H), 2.71 (td,  $J = 11.4, 5.4$  Hz, 1H), 2.65 – 2.58 (m, 1H), 1.83 (d,  $J = 3.6$  Hz, 1H), 1.50 (d,  $J = 4.8$  Hz, 5H), 1.21 (s, 4H), 1.12 (d,  $J = 6.0$  Hz, 3H), 0.83 (s, 6H).  $^{13}\text{C}$  NMR (150 MHz,  $\text{CDCl}_3$ )  $\delta$  172.1, 145.6, 128.2, 125.6, 124.6, 119.8, 112.6, 46.8, 30.0, 29.5, 26.1, 22.1, 19.8, 13.5. HRMS (ESI) calcd for  $\text{C}_{19}\text{H}_{30}\text{N}_2\text{O}$   $[\text{M}+\text{H}]^+$ : 302.2358, found: 302.2354.

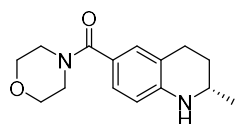

**(S)-(2-methyl-1,2,3,4-tetrahydroquinolin-6-yl)(morpholino)methanone (2l):**

Colorless oil, 74% yield, 80% *ee*;  $[\alpha]_D^{20} = -42.6$  ( $c = 0.63$ ,  $\text{CHCl}_3$ ). The *ee* was determined by HPLC on Chiralpak IA-H column, hexane: isopropanol = 90:10; flow rate = 0.8 mL/min; column temperature 25 °C; UV detection at 254 nm;  $t_{R1} = 67.62$  min (minor),  $t_{R2} = 76.05$  min (major).  $^1\text{H}$  NMR (600 MHz,  $\text{CDCl}_3$ )  $\delta$  7.08 (s, 1H), 7.01 (d,  $J = 8.4$  Hz, 1H), 6.37 (d,  $J = 7.8$  Hz, 1H), 4.03 (s, 1H), 3.75 – 3.55 (m, 8H), 3.44 – 3.39 (m, 1H), 2.81 – 2.75 (m, 1H), 2.73 – 2.68 (m, 1H), 1.97 – 1.81 (m, 1H), 1.58 – 1.50 (m, 1H), 1.19 (d,  $J = 6.0$  Hz, 3H).  $^{13}\text{C}$  NMR (150 MHz,  $\text{CDCl}_3$ )  $\delta$  171.2, 146.4, 129.3, 126.7, 122.4, 120.2, 112.6, 66.9, 47.0, 29.5, 26.3, 22.3. HRMS (ESI) calcd for  $\text{C}_{15}\text{H}_{20}\text{N}_2\text{O}_2$   $[\text{M}+\text{H}]^+$ : 260.1525, found: 260.1531.

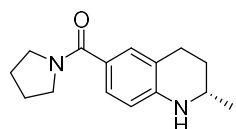

**(S)-(2-methyl-1,2,3,4-tetrahydroquinolin-6-yl)(pyrrolidin-1-yl)methanone (2m):**

Colorless oil, 83% yield, 87% *ee*;  $[\alpha]_D^{20} = -38.6$  ( $c = 0.74$ ,  $\text{CHCl}_3$ ). The *ee* was determined by HPLC on Chiralpak IA-H column, hexane: isopropanol = 90:10; flow rate = 0.8 mL/min; column temperature 25 °C; UV detection at 254 nm;  $t_{R1} = 61.37$  min (minor),  $t_{R2} = 69.30$  min (major).  $^1\text{H}$  NMR (600 MHz,  $\text{CDCl}_3$ )  $\delta$  7.21 (s, 1H), 7.16 (d,  $J = 7.8$  Hz, 1H), 6.36 (d,  $J = 8.4$  Hz, 1H), 4.02 (s, 1H), 3.64 – 3.46 (m, 4H), 3.42 – 3.38 (m, 1H), 2.80 – 2.74 (m, 1H), 2.69 (dt,  $J = 16.2, 4.8$  Hz, 1H), 2.02 – 1.71 (m, 5H), 1.61 – 1.44 (m, 1H), 1.18 (d,  $J = 6.0$  Hz, 3H).  $^{13}\text{C}$  NMR (150 MHz,  $\text{CDCl}_3$ )  $\delta$  170.0, 146.3, 129.2, 126.6, 124.6, 119.8, 112.4, 47.0, 29.6, 26.3, 22.3. HRMS (ESI) calcd for  $\text{C}_{15}\text{H}_{20}\text{N}_2\text{O}$   $[\text{M}+\text{H}]^+$ : 244.1576, found: 244.1581.

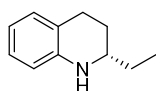

**(S)-2-ethyl-1,2,3,4-tetrahydroquinoline (2n):**

Yellow oil, 85% yield, 94% *ee*;  $[\alpha]_D^{20} = -34.3$  ( $c = 0.64$ ,  $\text{CHCl}_3$ ); lit.<sup>5</sup>  $[\alpha]_D^{25} = +75.9$  [ $c = 1.76$   $\text{CHCl}_3$ , 96% *ee* (R)]. The *ee* was determined by HPLC on Chiralpak OJ-H column, hexane: isopropanol = 90:10; flow rate = 0.8 mL/min; column temperature 25 °C; UV detection at 254 nm;  $t_{R1} = 17.44$  min (major),  $t_{R2} = 19.03$  min (minor).  $^1\text{H}$  NMR (400 MHz,  $\text{CDCl}_3$ )  $\delta$  7.03 (t,  $J = 7.2$  Hz, 2H), 6.67 (td,  $J = 7.2, 1.2$  Hz, 1H), 6.54 (d,  $J = 8.4$  Hz, 1H), 3.26 – 3.18 (m, 1H), 3.02 – 2.60 (m, 2H), 2.07 – 2.00 (m, 1H), 1.72 – 1.63 (m, 1H), 1.63 – 1.53 (m, 2H), 1.06 (t,  $J = 7.6$  Hz, 3H).  $^{13}\text{C}$  NMR (100 MHz,  $\text{CDCl}_3$ )  $\delta$  144.6, 129.1, 126.6, 121.3, 116.8, 113.9, 52.9, 29.3, 27.5, 26.3, 10.0. HRMS (ESI) calcd for  $\text{C}_{11}\text{H}_{15}\text{N}$   $[\text{M}+\text{H}]^+$ : 161.1204, found: 161.1203.

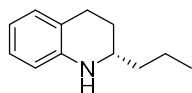

**(S)-2-propyl-1,2,3,4-tetrahydroquinoline (2o):**

Yellow oil, 83% yield, 80% *ee*;  $[\alpha]_D^{20} = -46.9$  ( $c = 0.81$ ,  $\text{CHCl}_3$ ); lit.<sup>5</sup>  $[\alpha]_D^{25} = +72.7$  [ $c = 1.58$   $\text{CHCl}_3$ , 93% *ee* (R)]. The *ee* was determined by HPLC on Chiralpak OJ-H column, hexane: isopropanol = 90:10; flow rate = 0.8 mL/min; column temperature 25 °C; UV detection at 254 nm;  $t_{R1} = 26.72$  min (major),  $t_{R2} = 33.33$  min (minor).  $^1\text{H}$  NMR (400 MHz,  $\text{CDCl}_3$ )  $\delta$  7.00 (d,  $J = 7.2$  Hz, 2H), 6.65 (td,  $J = 7.2, 1.2$  Hz, 1H), 6.52

(d,  $J = 8.0$  Hz, 1H), 3.56 (s, 1H), 3.33 – 3.26 (m, 1H), 2.93 – 2.65 (m, 2H), 2.11 – 1.90 (m, 1H), 1.70 – 1.59 (m, 1H), 1.58 – 1.28 (m, 4H), 1.02 (t,  $J = 7.2$  Hz, 3H).  $^{13}\text{C}$  NMR (100 MHz,  $\text{CDCl}_3$ )  $\delta$  144.6, 129.2, 126.6, 121.3, 116.8, 114.0, 51.2, 38.8, 28.0, 26.4, 18.8, 14.1. HRMS (ESI) calcd for  $\text{C}_{12}\text{H}_{17}\text{N}$   $[\text{M}+\text{H}]^+$ : 175.1361, found: 175.1356.

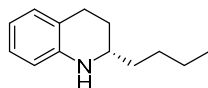

**(S)-2-butyl-1,2,3,4-tetrahydroquinoline (2p):**

Yellow oil, 83% yield, 85% *ee*;  $[\alpha]_{\text{D}}^{20} = -49.3$  ( $c = 1.03$ ,  $\text{CHCl}_3$ ); lit.<sup>5</sup>  $[\alpha]_{\text{D}}^{25} = +79.9$  [ $c = 1.0$   $\text{CHCl}_3$ , 92% *ee* (R)]. The *ee* was determined by HPLC on Chiralpak OJ-H column, hexane: isopropanol = 90:10; flow rate = 0.8 mL/min; column temperature 25 °C; UV detection at 254 nm;  $t_{\text{R}1} = 23.36$  min (major),  $t_{\text{R}2} = 27.10$  min (minor).  $^1\text{H}$  NMR (400 MHz,  $\text{CDCl}_3$ )  $\delta$  7.00 (t,  $J = 7.6$  Hz, 2H), 6.64 (td,  $J = 7.2$ , 1.2 Hz, 1H), 6.56 – 6.46 (m, 1H), 3.30 – 3.23 (m, 1H), 2.90 – 2.77 (m, 1H), 2.75 – 2.73 (m, 1H), 2.03 – 1.96 (m, 1H), 1.69 – 1.59 (m, 1H), 1.57 – 1.50 (m, 2H), 1.44 – 1.39 (m, 4H), 0.98 (t,  $J = 7.2$ , 3H).  $^{13}\text{C}$  NMR (100 MHz,  $\text{CDCl}_3$ )  $\delta$  144.7, 129.2, 126.6, 121.3, 116.8, 114.0, 51.5, 36.4, 28.0, 27.9, 26.4, 22.8, 14.0. HRMS (ESI) calcd for  $\text{C}_{13}\text{H}_{19}\text{N}$   $[\text{M}+\text{H}]^+$ : 189.1517, found: 189.1510.

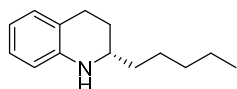

**(S)-2-pentyl-1,2,3,4-tetrahydroquinoline (2q):**

Yellow oil, 80% yield, 85% *ee*;  $[\alpha]_{\text{D}}^{20} = -50.3$  ( $c = 1.13$ ,  $\text{CHCl}_3$ ); lit.<sup>5</sup>  $[\alpha]_{\text{D}}^{25} = +73.1$  [ $c = 1.02$   $\text{CHCl}_3$ , 93% *ee* (R)]. The *ee* was determined by HPLC on Chiralpak OJ-H column, hexane: isopropanol = 90:10; flow rate = 0.5 mL/min; column temperature 25 °C; UV detection at 254 nm;  $t_{\text{R}1} = 13.73$  min (major),  $t_{\text{R}2} = 14.82$  min (minor).  $^1\text{H}$  NMR (400 MHz,  $\text{CDCl}_3$ )  $\delta$  7.01 (t,  $J = 7.2$  Hz, 2H), 6.65 (td,  $J = 7.2$ , 1.2 Hz, 1H), 6.52 (d,  $J = 7.2$  Hz, 1H), 3.31 – 3.24 (m, 1H), 2.90 – 2.82 (m, 1H), 2.77 (dt,  $J = 16.4$ , 4.8 Hz, 1H), 2.04 – 1.96 (m, 2H), 1.70 – 1.60 (m, 1H), 1.59 – 1.49 (m, 2H), 1.48 – 1.23 (m, 6H), 0.97 (t,  $J = 7.2$  Hz, 3H).  $^{13}\text{C}$  NMR (100 MHz,  $\text{CDCl}_3$ )  $\delta$  144.7, 129.2, 126.6, 121.3, 116.8, 114.0, 51.5, 36.6, 31.9, 28.0, 26.4, 25.3, 22.6, 14.0. HRMS (ESI) calcd for  $\text{C}_{14}\text{H}_{21}\text{N}$   $[\text{M}+\text{H}]^+$ : 203.1674, found: 203.1668.

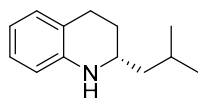

**(R)-2-isobutyl-1,2,3,4-tetrahydroquinoline (2r):**

Yellow oil, 88% yield, 68% *ee*;  $[\alpha]_D^{20} = -19.3$  ( $c = 0.53$ ,  $\text{CHCl}_3$ ); lit.<sup>3</sup>  $[\alpha]_D^{25} = +79.2$  [ $c = 1.0$   $\text{CHCl}_3$ , 88% *ee* (R)]. The *ee* was determined by HPLC on Chiralpak OJ-H column, hexane: isopropanol = 90:10; flow rate = 0.5 mL/min; column temperature 25 °C; UV detection at 254 nm;  $t_{R1} = 13.59$  min (major),  $t_{R2} = 16.87$  min (minor). <sup>1</sup>H NMR (400 MHz,  $\text{CDCl}_3$ )  $\delta$  7.00 (t,  $J = 7.2$  Hz, 2H), 6.71 – 6.60 (m, 1H), 6.52 (d,  $J = 8.0$  Hz, 1H), 3.48 – 3.20 (m, 1H), 2.91 – 2.82 (m, 1H), 2.77 (dt,  $J = 16.2, 4.8$  Hz, 1H), 2.11 – 1.89 (m, 1H), 1.86 – 1.75 (m, 1H), 1.68 – 1.58 (m, 1H), 1.50 – 1.27 (m, 2H), 1.00 (d,  $J = 6.8$  Hz, 6H). <sup>13</sup>C NMR (100 MHz,  $\text{CDCl}_3$ )  $\delta$  144.6, 129.2, 126.6, 121.3, 116.9, 114.0, 49.2, 45.8, 28.5, 26.4, 24.4, 23.2, 22.4. HRMS (ESI) calcd for  $\text{C}_{13}\text{H}_{19}\text{N}$   $[\text{M}+\text{H}]^+$ : 189.1517, found: 189.1519.

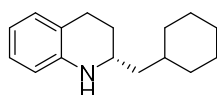

**(R)-2-(cyclohexylmethyl)-1,2,3,4-tetrahydroquinoline (2s):**

Yellow oil, 72% yield, 80% *ee*;  $[\alpha]_D^{20} = -20.1$  ( $c = 0.62$ ,  $\text{CHCl}_3$ ). The *ee* was determined by HPLC on Chiralpak OJ-H column, hexane: isopropanol = 95:5; flow rate = 0.6 mL/min; column temperature 25 °C; UV detection at 254 nm;  $t_{R1} = 12.00$  min (major),  $t_{R2} = 13.03$  min (minor). <sup>1</sup>H NMR (400 MHz,  $\text{CDCl}_3$ )  $\delta$  7.00 (t,  $J = 7.6$  Hz, 2H), 6.64 (t,  $J = 7.6$  Hz, 1H), 6.52 (d,  $J = 8.0$  Hz, 1H), 3.48 – 3.31 (m, 1H), 2.89 – 2.81 (m, 1H), 2.80 – 2.69 (m, 1H), 2.00 – 1.95 (m, 1H), 1.84 – 1.70 (m, 5H), 1.68 – 1.52 (m, 1H), 1.47 – 1.38 (m, 3H), 1.35 – 1.14 (m, 3H), 1.04 – 0.93 (m, 2H). <sup>13</sup>C NMR (100 MHz,  $\text{CDCl}_3$ )  $\delta$  144.6, 129.2, 126.6, 121.3, 116.8, 114.0, 48.5, 44.4, 33.9, 33.9, 33.2, 28.5, 26.5, 26.4, 26.3, 26.2. HRMS (ESI) calcd for  $\text{C}_{16}\text{H}_{23}\text{N}$   $[\text{M}+\text{H}]^+$ : 229.1830, found: 229.1826.

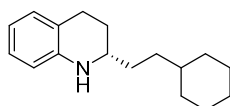

**(S)-2-(2-cyclohexylethyl)-1,2,3,4-tetrahydroquinoline (2t):**

Yellow oil, 70% yield, 76% *ee*;  $[\alpha]_D^{20} = -13.2$  ( $c = 0.43$ ,  $\text{CHCl}_3$ ). The *ee* was determined by HPLC on Chiralpak OD-H column, hexane: isopropanol = 98:2; flow rate = 1



mL/min; column temperature 25 °C; UV detection at 254 nm;  $t_{R1}$  = 6.27 min (minor),  $t_{R2}$  = 7.04 min (major).  $^1\text{H}$  NMR (600 MHz,  $\text{CDCl}_3$ )  $\delta$  7.00 (t,  $J$  = 7.8 Hz, 2H), 6.65 (td,  $J$  = 7.8, 1.2 Hz, 1H), 6.52 (d,  $J$  = 7.8 Hz, 1H), 3.37 (s, 1H), 3.27 – 3.22 (m, 1H), 2.89 – 2.82 (m, 1H), 2.77 (dt,  $J$  = 10.2, 4.2 Hz, 1H), 2.03 – 1.98 (m, 1H), 1.85 – 1.73 (m, 4H), 1.74 – 1.67 (m, 1H), 1.67 – 1.61 (m, 1H), 1.55 (td,  $J$  = 8.4, 6.0 Hz, 2H), 1.36 – 1.24 (m, 5H), 1.22 (dt,  $J$  = 12.0, 3.6 Hz, 1H), 1.02 – 0.90 (m, 2H).  $^{13}\text{C}$  NMR (150 MHz,  $\text{CDCl}_3$ )  $\delta$  144.8, 129.3, 126.7, 121.4, 116.9, 114.1, 52.0, 37.9, 34.1, 33.5, 33.5, 28.2, 26.8, 26.5, 26.5. HRMS (ESI) calcd for  $\text{C}_{17}\text{H}_{25}\text{N}$   $[\text{M}+\text{H}]^+$ : 243.1987, found: 243.1995.

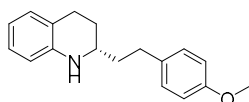

**(S)-2-(4-methoxyphenethyl)-1,2,3,4-tetrahydroquinoline (2u):**

Yellow oil, 86% yield, 87% *ee*;  $[\alpha]_{\text{D}}^{20}$  = -48.6 ( $c$  = 1.11,  $\text{CHCl}_3$ ); lit.<sup>2</sup>  $[\alpha]_{\text{D}}^{25}$  = -91.0 [ $c$  = 2.29,  $\text{CHCl}_3$ , 89% *ee* (S)]. The *ee* was determined by HPLC on Chiralpak OD-H column, hexane: isopropanol = 95:5; flow rate = 1 mL/min; column temperature 25 °C; UV detection at 254 nm;  $t_{R1}$  = 14.72 min (minor),  $t_{R2}$  = 17.15 min (major).  $^1\text{H}$  NMR (400 MHz,  $\text{CDCl}_3$ )  $\delta$  7.18 (d,  $J$  = 9.2 Hz, 2H), 7.01 (d,  $J$  = 7.2 Hz, 2H), 6.90 (d,  $J$  = 8.8 Hz, 2H), 6.66 (td,  $J$  = 7.2, 1.2 Hz, 1H), 6.51 (d,  $J$  = 7.2 Hz, 1H), 3.84 (s, 3H), 3.56 – 3.18 (m, 1H), 2.97 – 2.79 (m, 2H), 2.77 – 2.60 (m, 2H), 2.13 – 1.99 (m, 1H), 1.97 – 1.78 (m, 2H), 1.77 – 1.55 (m, 1H).  $^{13}\text{C}$  NMR (100 MHz,  $\text{CDCl}_3$ )  $\delta$  157.8, 144.5, 133.8, 129.2, 126.6, 121.2, 116.9, 114.1, 113.8, 55.2, 51.0, 38.4, 31.2, 27.9, 26.2. HRMS (ESI) calcd for  $\text{C}_{18}\text{H}_{21}\text{NO}$   $[\text{M}+\text{H}]^+$ : 267.1623, found: 267.1630.

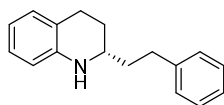

**(S)-2-phenethyl-1,2,3,4-tetrahydroquinoline (2v):**

Yellow oil, 85% yield, 87% *ee*;  $[\alpha]_{\text{D}}^{20}$  = -31.6 ( $c$  = 0.69,  $\text{CHCl}_3$ ); lit.<sup>3</sup>  $[\alpha]_{\text{D}}^{25}$  = +73.4 [ $c$  = 1.0  $\text{CHCl}_3$ , 91% *ee* (R)]. The *ee* was determined by HPLC on Chiralpak OJ-H column, hexane: isopropanol = 90:10; flow rate = 0.8 mL/min; column temperature 25 °C; UV detection at 254 nm;  $t_{R1}$  = 76.38 min (major),  $t_{R2}$  = 82.72 min (minor).  $^1\text{H}$  NMR (600 MHz,  $\text{CDCl}_3$ )  $\delta$  7.37 (dd,  $J$  = 8.4, 6.6 Hz, 2H), 7.28 (d,  $J$  = 7.8 Hz, 3H), 7.03 (t,  $J$  = 7.8 Hz, 2H), 6.68 (td,  $J$  = 7.8, 1.2 Hz, 1H), 6.51 (d,  $J$  = 8.4 Hz, 1H), 3.81 (s, 1H), 3.38 – 3.33 (m, 1H), 2.90 – 2.84 (m, 1H), 2.80 (t,  $J$  = 7.8 Hz, 3H), 2.08 – 2.03 (m, 1H), 1.91 – 1.87 (m, 2H), 1.77 – 1.70 (m, 1H).  $^{13}\text{C}$  NMR (150 MHz,  $\text{CDCl}_3$ )  $\delta$  144.5, 141.8, 129.2,

128.4, 128.3, 126.7, 125.9, 121.2, 117.0, 114.1, 51.0, 38.2, 32.1, 27.9, 26.2. HRMS (ESI) calcd for C<sub>17</sub>H<sub>19</sub>N [M+H]<sup>+</sup>: 237.1517, found: 237.1510.

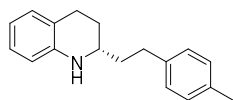

**(S)-2-(4-methylphenethyl)-1,2,3,4-tetrahydroquinoline (2w):**

Yellow oil, 78% yield, 86% *ee*; [ $\alpha$ ]<sub>D</sub><sup>20</sup> = -46.9 (c = 1.03, CHCl<sub>3</sub>); lit.<sup>3</sup> [ $\alpha$ ]<sub>D</sub><sup>25</sup> = +71.3 [c = 1.0 CHCl<sub>3</sub>, 92% *ee* (R)]. The *ee* was determined by HPLC on Chiralpak OD-H column, hexane: isopropanol = 90:10; flow rate = 0.8 mL/min; column temperature 25 °C; UV detection at 254 nm; t<sub>R1</sub> = 10.92 min (minor), t<sub>R2</sub> = 11.70 min (major). <sup>1</sup>H NMR (600 MHz, CDCl<sub>3</sub>)  $\delta$  7.14 (s, 4H), 7.04 – 6.91 (m, 2H), 6.63 (td, *J* = 7.2, 1.2 Hz, 1H), 6.48 (dd, *J* = 8.4, 1.2 Hz, 1H), 3.47 – 3.24 (m, 1H), 2.87 – 2.80 (m, 1H), 2.78 (t, *J* = 4.8 Hz, 1H), 2.75 – 2.71 (m, 2H), 2.36 (s, 3H), 2.05 – 1.99 (m, 1H), 1.90 – 1.77 (m, 2H), 1.73 – 1.66 (m, 1H). <sup>13</sup>C NMR (150 MHz, CDCl<sub>3</sub>)  $\delta$  144.6, 138.8, 135.5, 129.3, 129.2, 128.3, 126.8, 121.4, 117.0, 114.2, 51.1, 38.4, 31.7, 28.0, 26.3, 21.0. HRMS (ESI) calcd for C<sub>18</sub>H<sub>21</sub>N [M+H]<sup>+</sup>: 251.1674, found: 251.1680.

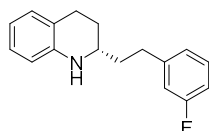

**(S)-2-(3-fluorophenethyl)-1,2,3,4-tetrahydroquinoline (2x):**

Yellow oil, 82% yield, 85% *ee*; [ $\alpha$ ]<sub>D</sub><sup>20</sup> = -63.4 (c = 1.21, CHCl<sub>3</sub>). The *ee* was determined by HPLC on Chiralpak OD-H column, hexane: isopropanol = 95:5; flow rate = 1 mL/min; column temperature 25 °C; UV detection at 254 nm; t<sub>R1</sub> = 11.30 min (minor), t<sub>R2</sub> = 13.79 min (major). <sup>1</sup>H NMR (400 MHz, CDCl<sub>3</sub>)  $\delta$  7.30 (td, *J* = 7.6, 6.0 Hz, 1H), 7.02 (t, *J* = 8.0 Hz, 3H), 7.00 – 6.89 (m, 2H), 6.67 (td, *J* = 7.2, 1.2 Hz, 1H), 6.52 (d, *J* = 8.0 Hz, 1H), 3.38 – 3.30 (m, 1H), 2.97 – 2.62 (m, 4H), 2.11 – 1.97 (m, 1H), 1.90 – 1.83 (m, 2H), 1.78 – 1.67 (m, 1H). <sup>13</sup>C NMR (100 MHz, CDCl<sub>3</sub>)  $\delta$  162.9 (d, *J* = 245.4 Hz), 144.4, 144.4, 129.8 (d, *J* = 8.3 Hz), 129.2, 126.7, 123.9 (d, *J* = 2.8 Hz), 121.2, 117.1, 115.1 (d, *J* = 20.8 Hz), 114.1, 112.8 (d, *J* = 21.0 Hz), 50.9, 37.9, 31.7 (d, *J* = 1.8 Hz), 27.8 26.1. <sup>19</sup>F NMR (376 MHz, CDCl<sub>3</sub>)  $\delta$  -113.40. HRMS (ESI) calcd for C<sub>17</sub>H<sub>18</sub>FN [M+H]<sup>+</sup>: 255.1423, found: 255.1419.

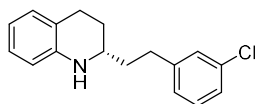

**(S)-2-(3-chlorophenethyl)-1,2,3,4-tetrahydroquinoline (2y):**

Yellow oil, 85% yield, 83% *ee*;  $[\alpha]_{\text{D}}^{20} = -36.3$  ( $c = 1.08$ ,  $\text{CHCl}_3$ ). The *ee* was determined by HPLC on Chiralpak OD-H column, hexane: isopropanol = 90:10; flow rate = 0.8 mL/min; column temperature 25 °C; UV detection at 254 nm;  $t_{\text{R}1} = 16.46$  min (minor),  $t_{\text{R}2} = 17.91$  min (major).  $^1\text{H}$  NMR (600 MHz,  $\text{CDCl}_3$ )  $\delta$  7.23 – 7.12 (m, 3H), 7.06 (d,  $J = 7.2$  Hz, 1H), 6.95 (td,  $J = 7.2, 5.4$  Hz, 2H), 6.60 (td,  $J = 7.2, 1.2$  Hz, 1H), 6.45 (dd,  $J = 7.8, 1.2$  Hz, 1H), 3.73 (s, 1H), 3.29 – 3.24 (m, 1H), 2.83 – 2.76 (m, 1H), 2.72 (dt,  $J = 16.8, 4.8$  Hz, 1H), 2.68 (t,  $J = 8.4$  Hz, 2H), 1.99 – 1.94 (m, 1H), 1.85 – 1.73 (m, 2H), 1.69 – 1.61 (m, 1H).  $^{13}\text{C}$  NMR (150 MHz,  $\text{CDCl}_3$ )  $\delta$  144.3, 143.8, 134.1, 129.6, 129.2, 128.4, 126.7, 126.5, 126.1, 121.1, 117.0, 114.1, 50.9, 37.9, 31.65, 27.7, 26.0. HRMS (ESI) calcd for  $\text{C}_{17}\text{H}_{18}\text{ClN}$   $[\text{M}+\text{H}]^+$ : 271.1128, found: 271.1130.

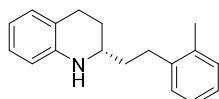

**(S)-2-(2-methylphenethyl)-1,2,3,4-tetrahydroquinoline (2z):**

Yellow oil, 83% yield, 82% *ee*;  $[\alpha]_{\text{D}}^{20} = -39.2$  ( $c = 1.16$ ,  $\text{CHCl}_3$ ). The *ee* was determined by HPLC on Chiralpak OD-H column, hexane: isopropanol = 95:5; flow rate = 1 mL/min; column temperature 25 °C; UV detection at 254 nm;  $t_{\text{R}1} = 15.27$  min (minor),  $t_{\text{R}2} = 16.35$  min (major).  $^1\text{H}$  NMR (400 MHz,  $\text{CDCl}_3$ )  $\delta$  7.24 – 7.19 (m, 4H), 7.03 (d,  $J = 7.6$  Hz, 2H), 6.68 (td,  $J = 7.6, 1.2$  Hz, 1H), 6.52 (d,  $J = 7.6$  Hz, 1H), 3.44 – 3.55 (m, 1H), 3.02 – 2.82 (m, 2H), 2.81 – 2.73 (m, 2H), 2.40 (s, 3H), 2.18 – 2.01 (m, 1H), 1.94 – 1.80 (m, 2H), 1.80 – 1.62 (m, 1H).  $^{13}\text{C}$  NMR (100 MHz,  $\text{CDCl}_3$ )  $\delta$  144.5, 140.0, 135.7, 130.2, 129.2, 128.7, 126.7, 126.0, 126.0, 117.0, 114.1, 51.4, 37.0, 29.4, 27.9, 26.2, 19.3. HRMS (ESI) calcd for  $\text{C}_{18}\text{H}_{21}\text{N}$   $[\text{M}+\text{H}]^+$ : 251.1674, found: 251.1676.

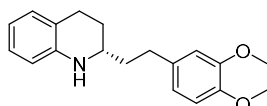

**(S)-2-(3,4-dimethoxyphenethyl)-1,2,3,4-tetrahydroquinoline (2aa):**

Light yellow oil, 90% yield, 91% *ee*;  $[\alpha]_{\text{D}}^{20} = -30.2$  ( $c = 1.32$ ,  $\text{CHCl}_3$ ); lit.<sup>2</sup>  $[\alpha]_{\text{D}}^{25} = -41.1$  [ $c = 3.17$ ,  $\text{CHCl}_3$ , 88% *ee* (S)]. The *ee* was determined by HPLC on Chiralpak OD-H column, hexane: isopropanol = 95:5; flow rate = 1 mL/min; column temperature

25 °C; UV detection at 254 nm;  $t_{R1}$  = 61.48 min (minor),  $t_{R2}$  = 73.16 min (major).  $^1\text{H}$  NMR (400 MHz,  $\text{CDCl}_3$ )  $\delta$  6.98 – 6.95(m, 2H), 6.84 – 6.73 (m, 3H), 6.61 (td,  $J$  = 7.6, 1.2 Hz, H), 6.46 (dd,  $J$  = 8.4, 1.2 Hz, 1H), 3.88 (d,  $J$  = 5.2 Hz, 6H), 3.52 – 3.20 (m, 1H), 2.95 – 2.49 (m, 4H), 2.04 – 1.97 (m, 2H), 1.90 – 1.77 (m, 1H), 1.75 – 1.63 (m, 1H).  $^{13}\text{C}$  NMR (100 MHz,  $\text{CDCl}_3$ )  $\delta$  148.9, 147.2, 144.4, 134.4, 129.2, 126.7, 121.2, 120.1, 117.0, 114.1, 111.6, 111.2, 55.9, 55.8, 51.2, 38.4, 31.8, 28.0, 26.2. HRMS (ESI) calcd for  $\text{C}_{19}\text{H}_{23}\text{NO}_2$   $[\text{M}+\text{H}]^+$ : 297.1729, found: 297.1732.

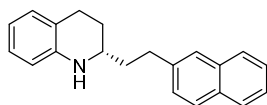

**(S)-2-(2-(naphthalen-2-yl)ethyl)-1,2,3,4-tetrahydroquinoline (2ab):**

Light yellow oil, 75% yield, 99% *ee*;  $[\alpha]_D^{20}$  = -78.3 ( $c$  = 1.21,  $\text{CHCl}_3$ ). The *ee* was determined by HPLC on Chiralpak OD-H column, hexane: isopropanol = 85:15; flow rate = 0.8 mL/min; column temperature 25 °C; UV detection at 254 nm;  $t_{R1}$  = 51.11 min (minor),  $t_{R2}$  = 62.25 min (major).  $^1\text{H}$  NMR (400 MHz,  $\text{CDCl}_3$ )  $\delta$  8.05 (dd,  $J$  = 8.4, 1.6 Hz, 1H), 7.87 (dd,  $J$  = 7.6, 1.6 Hz, 1H), 7.73 (d,  $J$  = 8.0 Hz, 1H), 7.58 – 7.46 (m, 2H), 7.45 – 7.33 (m, 2H), 7.05 – 6.94 (m, 2H), 6.62 (td,  $J$  = 7.2, 1.2 Hz, 1H), 6.48 (dd,  $J$  = 8.4, 1.2 Hz, 1H), 3.64 – 3.33 (m, 1H), 3.27 – 3.10 (m, 2H), 2.94 – 2.66 (m, 2H), 2.22 – 2.03 (m, 1H), 2.04 – 1.93 (m, 2H), 1.86 – 1.69 (m, 2H).  $^{13}\text{C}$  NMR (100 MHz,  $\text{CDCl}_3$ )  $\delta$  144.4, 137.9, 133.8, 131.6, 129.2, 128.8, 126.7, 126.7, 125.8, 125.8, 125.5, 125.5, 123.5, 121.2, 117.0, 114.1, 51.3, 37.4, 29.1, 27.8, 26.2. HRMS (ESI) calcd for  $\text{C}_{21}\text{H}_{21}\text{N}$   $[\text{M}+\text{H}]^+$ : 287.1674, found: 287.1680.

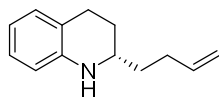

**(S)-2-(but-3-en-1-yl)-1,2,3,4-tetrahydroquinoline (2ac):**

Light yellow oil, 88% yield, 90% *ee*;  $[\alpha]_D^{20}$  = -39.2 ( $c$  = 0.64,  $\text{CHCl}_3$ ). The *ee* was determined by HPLC on Chiralpak OJ-H column, hexane: isopropanol = 90:10; flow rate = 0.8 mL/min; column temperature 25 °C; UV detection at 254 nm;  $t_{R1}$  = 12.21 min (major),  $t_{R2}$  = 13.36 min (minor).  $^1\text{H}$  NMR (600 MHz,  $\text{CDCl}_3$ )  $\delta$  7.00 (t,  $J$  = 8.4 Hz, 2H), 6.64 (t,  $J$  = 7.2 Hz, 1H), 6.51 (d,  $J$  = 7.8 Hz, 1H), 5.93 – 5.85 (m, 1H), 5.18 – 4.99 (m, 2H), 3.34 – 3.28 (m, 1H), 2.88 – 2.80 (m, 1H), 2.77 (dt,  $J$  = 16.2, 4.8 Hz, 1H), 2.22

(q,  $J = 7.2$  Hz, 2H), 2.03 – 1.97 (m, 1H), 1.73 – 1.55 (m, 3H).  $^{13}\text{C}$  NMR (150 MHz,  $\text{CDCl}_3$ )  $\delta$  144.5, 138.2, 129.2, 126.7, 121.2, 116.9, 114.9, 114.1, 51.0, 35.6, 30.0, 27.9, 26.2. HRMS (ESI) calcd for  $\text{C}_{13}\text{H}_{17}\text{N}$   $[\text{M}+\text{H}]^+$ : 187.1361, found: 187.1353.

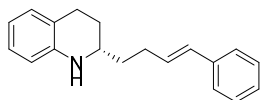

**(S,E)-2-(4-phenylbut-3-en-1-yl)-1,2,3,4-tetrahydroquinoline (2ad):**

Light yellow oil, 86% yield, 90% *ee*;  $[\alpha]^{20}_{\text{D}} = -41.6$  ( $c = 0.71$ ,  $\text{CHCl}_3$ ). The *ee* was determined by HPLC on Chiralpak OD-H column, hexane: isopropanol = 90:10; flow rate = 0.8 mL/min; column temperature 25 °C; UV detection at 254 nm;  $t_{\text{R}1} = 18.68$  min (minor),  $t_{\text{R}2} = 21.36$  min (major).  $^1\text{H}$  NMR (600 MHz,  $\text{CDCl}_3$ )  $\delta$  7.35 (d,  $J = 7.8$  Hz, 2H), 7.31 (t,  $J = 7.8$  Hz, 2H), 7.21 (t,  $J = 7.8$  Hz, 1H), 6.97 (t,  $J = 7.8$  Hz, 2H), 6.61 (t,  $J = 7.2$  Hz, 1H), 6.54 – 6.45 (m, 2H), 6.25 (dt,  $J = 16.2, 7.2$  Hz, 1H), 3.84 (s, 1H), 3.36 – 3.32 (m, 1H), 2.85 – 2.79 (m, 1H), 2.75 (dt,  $J = 16.2, 4.8$  Hz, 1H), 2.36 (q,  $J = 6.6$  Hz, 2H), 2.03 – 1.97 (m, 1H), 1.72 – 1.63 (m, 3H).  $^{13}\text{C}$  NMR (150 MHz,  $\text{CDCl}_3$ )  $\delta$  144.5, 137.5, 130.4, 130.1, 129.2, 128.5, 127.0, 126.7, 125.9, 121.3, 117.0, 114.1, 51.1, 36.1, 29.3, 27.9, 26.2. HRMS (ESI) calcd for  $\text{C}_{19}\text{H}_{21}\text{N}$   $[\text{M}+\text{H}]^+$ : 263.1674, found: 263.1680.

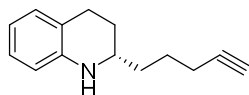

**(S)-2-(pent-4-yn-1-yl)-1,2,3,4-tetrahydroquinoline (2ae):**

Light yellow oil, 80% yield, 87% *ee*;  $[\alpha]^{20}_{\text{D}} = -29.4$  ( $c = 0.52$ ,  $\text{CHCl}_3$ ). The *ee* was determined by HPLC on Chiralpak OJ-H column, hexane: isopropanol = 90:10; flow rate = 0.8 mL/min; column temperature 25 °C; UV detection at 254 nm;  $t_{\text{R}1} = 32.89$  min (major),  $t_{\text{R}2} = 40.87$  min (minor).  $^1\text{H}$  NMR (600 MHz,  $\text{CDCl}_3$ )  $\delta$  6.98 (t,  $J = 7.8$  Hz, 2H), 6.63 (td,  $J = 7.2, 1.2$  Hz, 1H), 6.50 (dd,  $J = 7.8, 1.2$  Hz, 1H), 3.43 – 3.15 (m, 1H), 2.87 – 2.80 (m, 1H), 2.76 (dt,  $J = 16.2, 4.8$  Hz, 1H), 2.27 (dt,  $J = 6.6, 3.0$  Hz, 2H), 2.07 – 1.92 (m, 2H), 1.75 – 1.58 (m, 5H).  $^{13}\text{C}$  NMR (150 MHz,  $\text{CDCl}_3$ )  $\delta$  144.5, 129.2, 126.7, 121.2, 117.0, 114.0, 84.1, 68.7, 51.0, 35.6, 27.8, 26.2, 24.5, 18.5. HRMS (ESI) calcd for  $\text{C}_{14}\text{H}_{17}\text{N}$   $[\text{M}+\text{H}]^+$ : 199.1361, found: 199.1354.

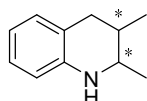

### 2,3-dimethyl-1,2,3,4-tetrahydro-quinoline (2af):

Light yellow oil, 93% yield,  $dr = 1.28:1$ , 97%  $ee$ , 89%  $ee$ ;  $[\alpha]_D^{20} = -8.6$  ( $c = 0.32$ ,  $\text{CHCl}_3$ ). The  $dr$  and  $ee$  were determined by HPLC on Chiralpak OJ-H column, hexane: isopropanol = 90:10; flow rate = 0.8 mL/min; column temperature 25 °C; UV detection at 254 nm;  $t_{R1} = 19.71$  min (minor),  $t_{R2} = 23.25$  min (major),  $t_{R3} = 25.15$  min (major),  $t_{R4} = 29.00$  min (minor).  $^1\text{H NMR}$  (600 MHz,  $\text{CDCl}_3$ )  $\delta$  7.00 – 6.91 (m, 2H), 6.63 – 6.57 (m, 1H), 6.47 (dd,  $J = 7.8, 1.2$  Hz, 1H), 3.68 (s, 1H), 3.03 – 2.99 (m, 1H), 2.73 (dd,  $J = 16.2, 4.8$  Hz, 1H), 2.57 – 2.42 (m, 1H), 1.66 - 1.60 (m, 1H), 1.20 (d,  $J = 6.0$  Hz, 3H), 1.02 (d,  $J = 6.6$  Hz, 3H).  $^{13}\text{C NMR}$  (150 MHz,  $\text{CDCl}_3$ )  $\delta$  144.5, 129.0, 126.7, 121.3, 116.8, 113.4, 53.3, 35.5, 33.5, 20.8, 18.3. HRMS (ESI) calcd for  $\text{C}_{11}\text{H}_{15}\text{N}$   $[\text{M}+\text{H}]^+$ : 161.1204, found: 161.1210.

## 5. General procedure for gram-scale synthesis of (-)-cuspareine

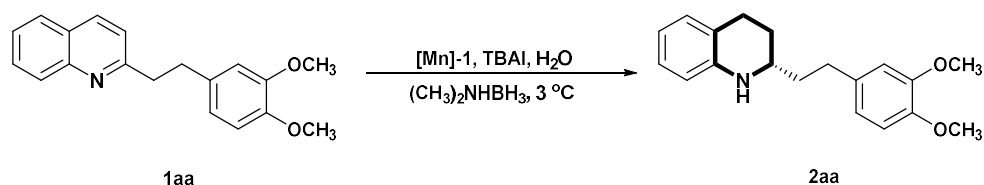

Under argon atmosphere,  $\text{Mn}(\text{CO})_5\text{Br}$  (0.1 mmol), **L1** (0.11 mmol), degassed toluene (10 mL) was added into a tube and the mixture was heated to reflux for 4 h. The mixture was cooled to room temperature and concentrated to dryness, affording the crude Mn-**L1** complex. The Mn-**L1** complex, TBAI (2 mmol), **1aa** (5 mmol) and  $\text{H}_2\text{O}$  (15 mL) were added in a 50mL Schlenk flask. The mixture was stirred for 60 min at 3 °C.  $(\text{CH}_3)_2\text{NHBH}_3$  (20 mmol) was added and the mixture was stirred at 3 °C for 50 h. The solvent was removed, and the mixture was purified by passing through a short column of silica gel to afford the corresponding product **2aa** with 1.37 g, 92% yield in 91.5%  $ee$ .

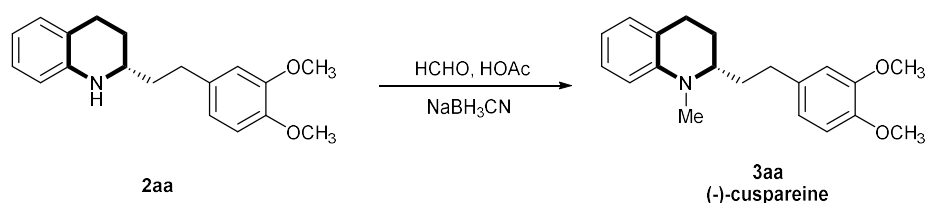

Under  $\text{N}_2$  atmosphere, a solution of **2aa** (4.6 mmol) and 1M  $\text{HCHO}$ - $\text{AcOH}$  solution (9.2 mL) was stirred at RT. The  $\text{NaBH}_3\text{CN}$  (9.2 mmol) was added and the mixture was stirred at RT for 2h. Then, the solvent was removed under vacuum and 20 mL water

and 35 mL DCM were added. The organic phase was washed with aqueous sodium hydrogencarbonate (25 mL), aqueous sodium hydrogensulfate (25 mL) and water (25 mL). The organic phase was dried over Na<sub>2</sub>SO<sub>4</sub> and evaporated under vacuum. Finally, the crude product (-)-cuspareine was purified by column chromatography (ethyl acetate: petroleum ether = 1:15 to 1:20) on silica gel with 1.38g, 96% yield, 89% *ee*.

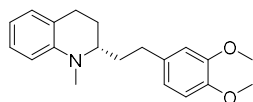

### (S)-2-(3,4-dimethoxyphenethyl)-1-methyl-1,2,3,4-tetrahydroquinoline (3aa):

Light yellow oil, 96% yield, 89% *ee*; [ $\alpha$ ]<sub>D</sub><sup>20</sup> = -62.6 (*c* = 1.51, CHCl<sub>3</sub>). The *ee* was determined by HPLC on Chiralpak OJ-H column, hexane: isopropanol = 90:10; flow rate = 1 mL/min; column temperature 25 °C; UV detection at 210 nm; *t*<sub>R1</sub> = 21.42 min (minor), *t*<sub>R2</sub> = 45.66 min (major). <sup>1</sup>H NMR (600 MHz, CDCl<sub>3</sub>) δ 7.17 – 7.08 (m, 1H), 7.02 (dd, *J* = 7.2, 1.8 Hz, 1H), 6.83 (d, *J* = 7.8 Hz, 1H), 6.78 – 6.71 (m, 2H), 6.63 (td, *J* = 7.2, 1.2 Hz, 1H), 6.57 (d, *J* = 8.4 Hz, 1H), 3.90 (d, *J* = 10.2 Hz, 6H), 3.32 (dd, *J* = 9.0, 4.2 Hz, 1H), 2.95 (s, 3H), 2.94 – 2.85 (m, 1H), 2.78 – 2.65 (m, 2H), 2.60 – 2.53 (m, 1H), 2.04 – 1.89 (m, 3H), 1.81 – 1.73 (m, *J* = 13.9, 1H). <sup>13</sup>C NMR (150 MHz, CDCl<sub>3</sub>) δ 148.8, 147.1, 145.2, 134.6, 128.6, 127.0, 121.6, 120.0, 115.3, 111.5, 111.2, 110.5, 58.3, 55.8, 55.8, 38.0, 33.0, 31.8, 24.3, 23.5. HRMS (ESI) calcd for C<sub>20</sub>H<sub>25</sub>NO<sub>2</sub> [M+H]<sup>+</sup>: 311.1815, found: 311.1810.

## 6. Isotopic labelling experiments

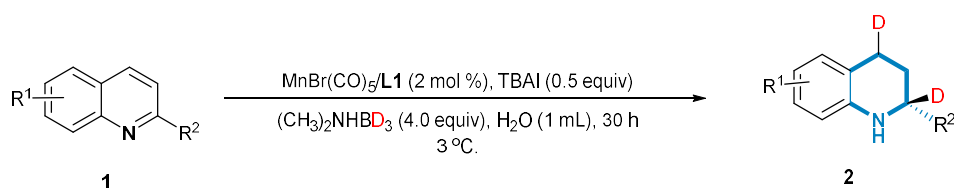

To gain further mechanistic insights, the ATH of 1a using (CH<sub>3</sub>)<sub>2</sub>NHBD<sub>3</sub> instead of (CH<sub>3</sub>)<sub>2</sub>NHBD<sub>3</sub> as the hydrogen source was examined.

Under argon atmosphere, Mn(CO)<sub>5</sub>Br (0.02 mmol), L1 (0.022 mmol), degassed toluene (2 mL) was added into tube and the mixture was heated to reflux for 3 h. The mixture was cooled to room temperature and concentrated to dryness, affording the crude Mn-L1 complex. The Mn-L1 complex, TBAI (0.1 mmol), 1 (0.2 mmol) and H<sub>2</sub>O (1.0 mL) were added in a 10 mL Schlenk flask. The mixture was stirred for 10 min at

3 °C. (CH<sub>3</sub>)<sub>2</sub>NHBD<sub>3</sub> was added and the mixture was stirred at 3 °C for 30 h. The solvent was removed, and the mixture was purified by passing through a short column of silica gel to afford the corresponding product. The product was dissolved in CDCl<sub>3</sub> and analyzed through <sup>2</sup>H NMR spectroscopy.

The result indicated that the the hydrogen atoms added at N and C2 positions were from the (CH<sub>3</sub>)<sub>2</sub>NH motif in ammonia borane, and the hydrogen atoms at C1 and C3 positions were from the BH<sub>3</sub> motif in ammonia borane.

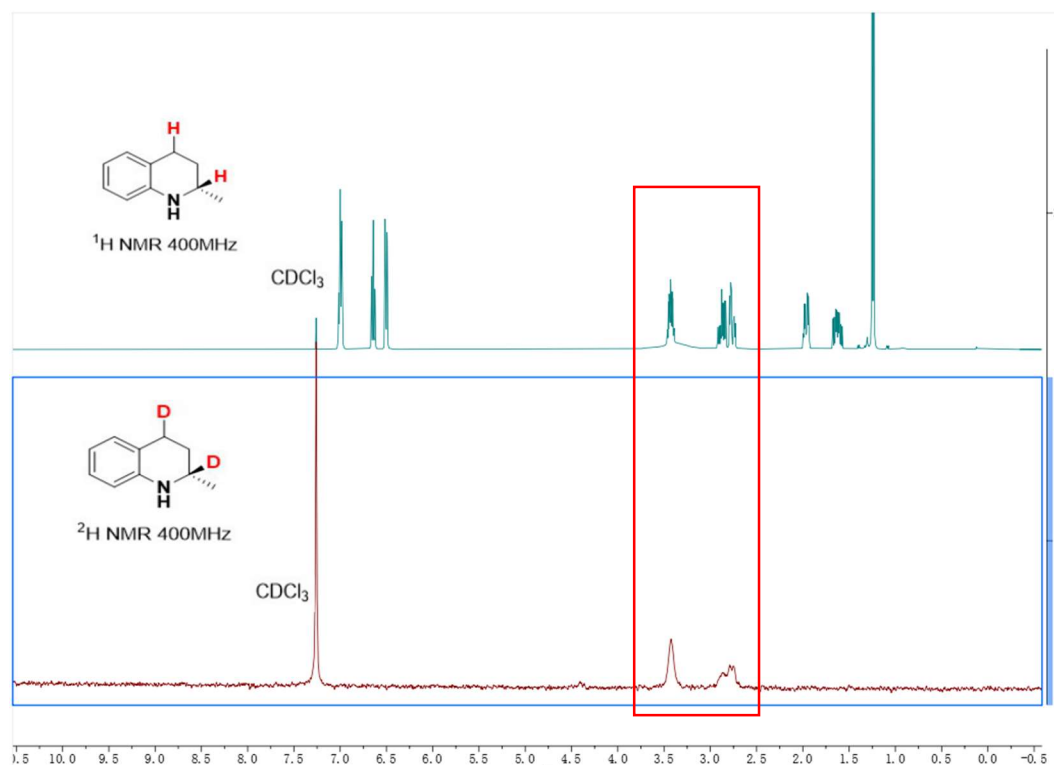

## 7. References

1. L. Wang, J. Lin, Q. Sun, C. Xia and W. Sun, Amino Acid Derived Chiral Aminobenzimidazole Manganese Catalysts for Asymmetric Transfer Hydrogenation of Ketones, *ACS Catal.*, 2021, **11**, 8033-8041.
2. C. Liu, M. Wang, S. Liu, Y. Wang, Y. Peng, Y. Lan and Q. Liu, Manganese-Catalyzed Asymmetric Hydrogenation of Quinolines Enabled by  $\pi$ - $\pi$  Interaction\*\*, *Angew. Chem. Int. Ed.*, 2021, **60**, 5108-5113.
3. M. Rueping and R.M. Koenigs, Brønsted acid differentiated metal catalysis by kinetic discrimination, *Chem. Commun.*, 2011, **47**, 304-306.



4. L. Wang, J. Lin, C. Xia and W. Sun, Iridium-Catalyzed Asymmetric Transfer Hydrogenation of Quinolines in Biphasic System or Water, *J. Org. Chem.*, 2021, **86**, 16641-16651.
5. W.-B. Wang, S.-M. Lu, P.-Y. Yang, X.-W. Han and Y.-G. Zhou, Highly Enantioselective Iridium-Catalyzed Hydrogenation of Heteroaromatic Compounds, Quinolines, *J. Am. Chem. Soc.*, 2003, **125**, 10536-10537.

## 8. Copies of NMR spectra

### (S)-3-methyl-1-(1-methyl-1H-benzo[d]imidazol-2-yl)butan-1-amine (L1)

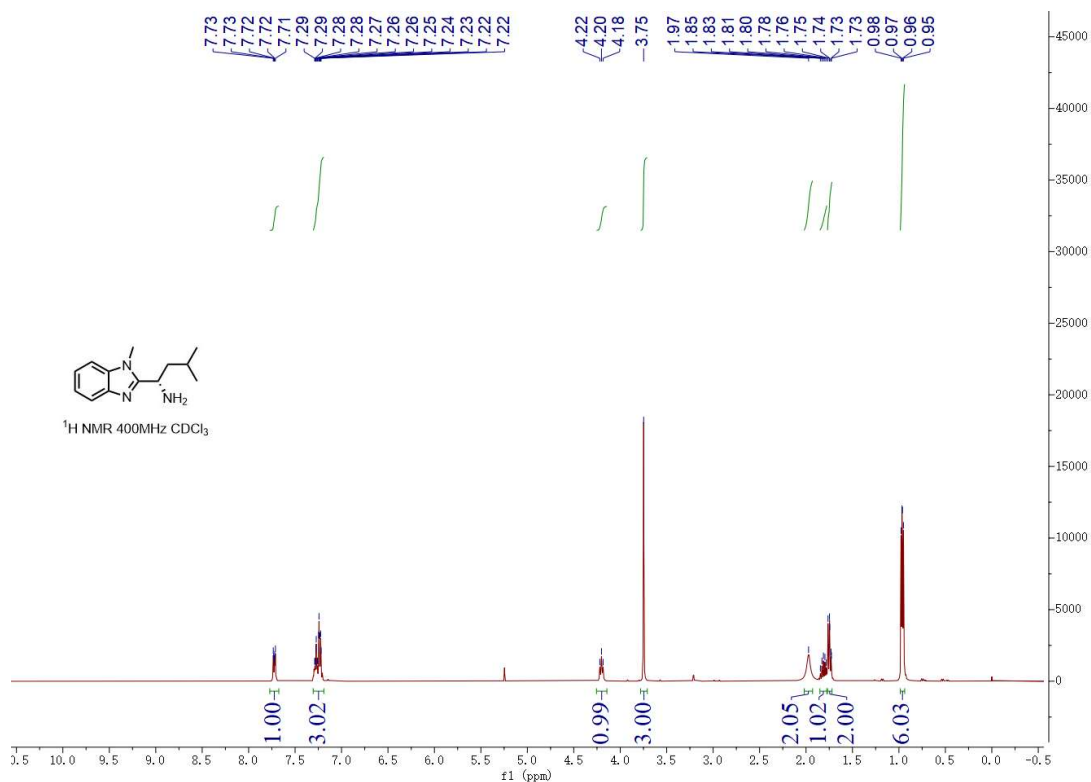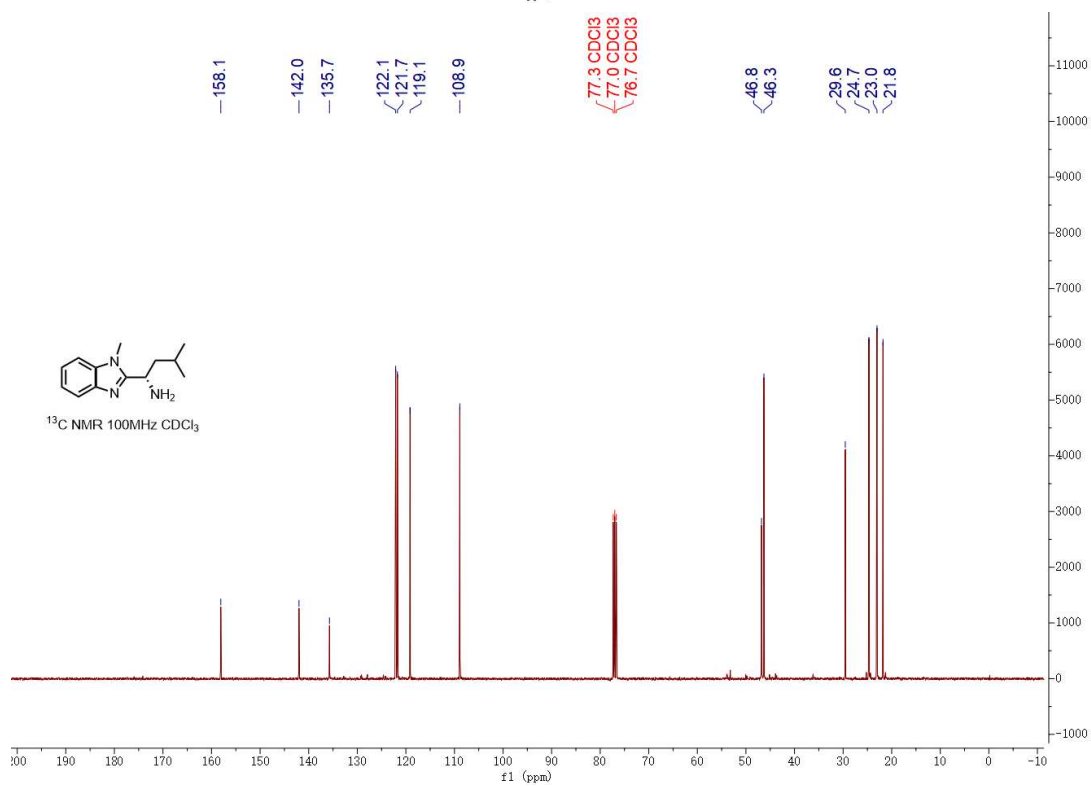

# (1S,2R)-2-methyl-1-(1-methyl-1H-benzo[d]imidazol-2-yl)butan-1-amine (L6)

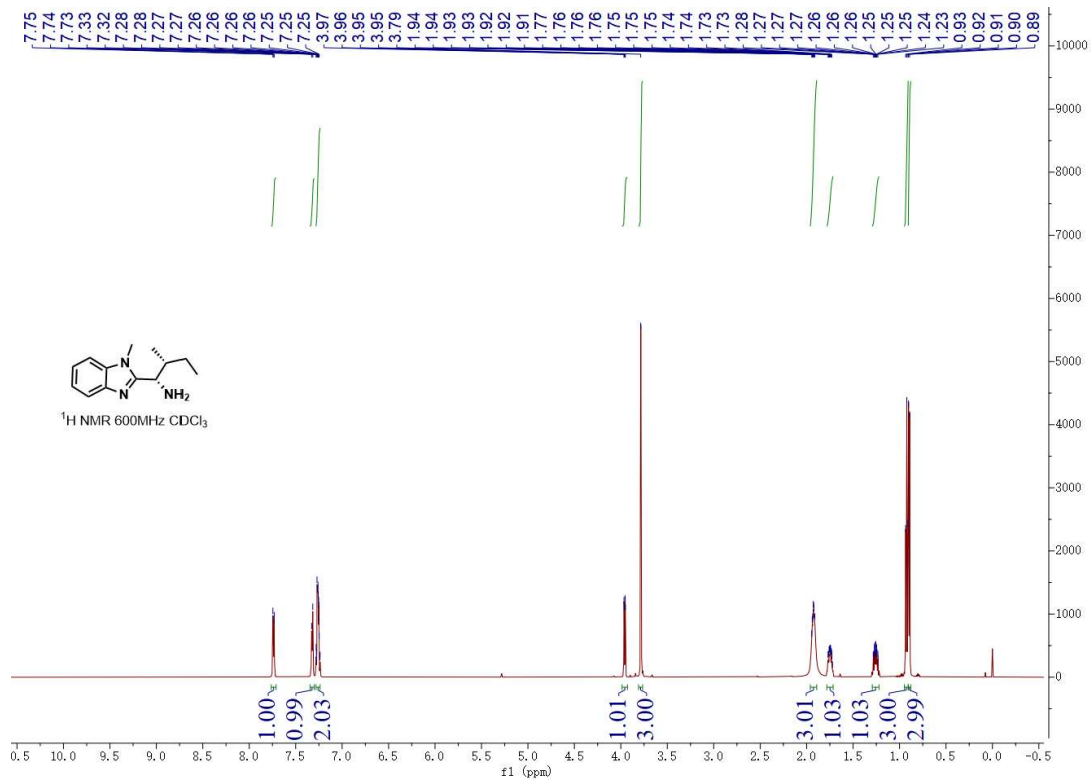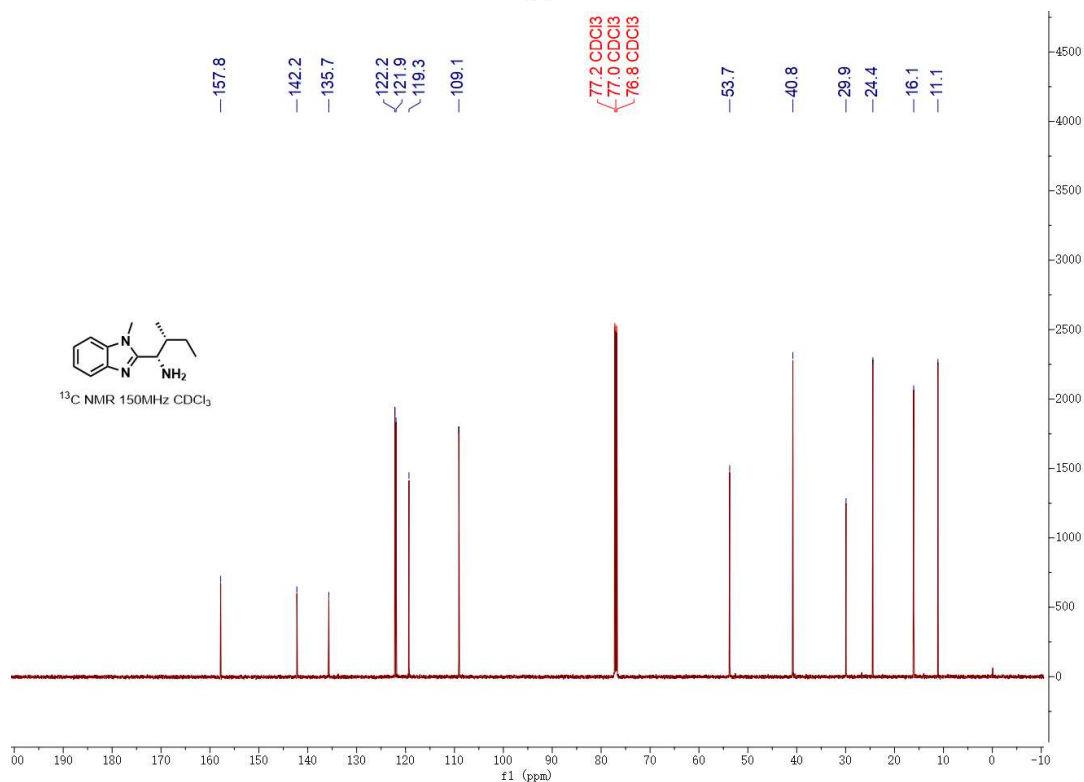

# N,N-dibutyl-2-methylquinoline-6-carboxamide (1k)

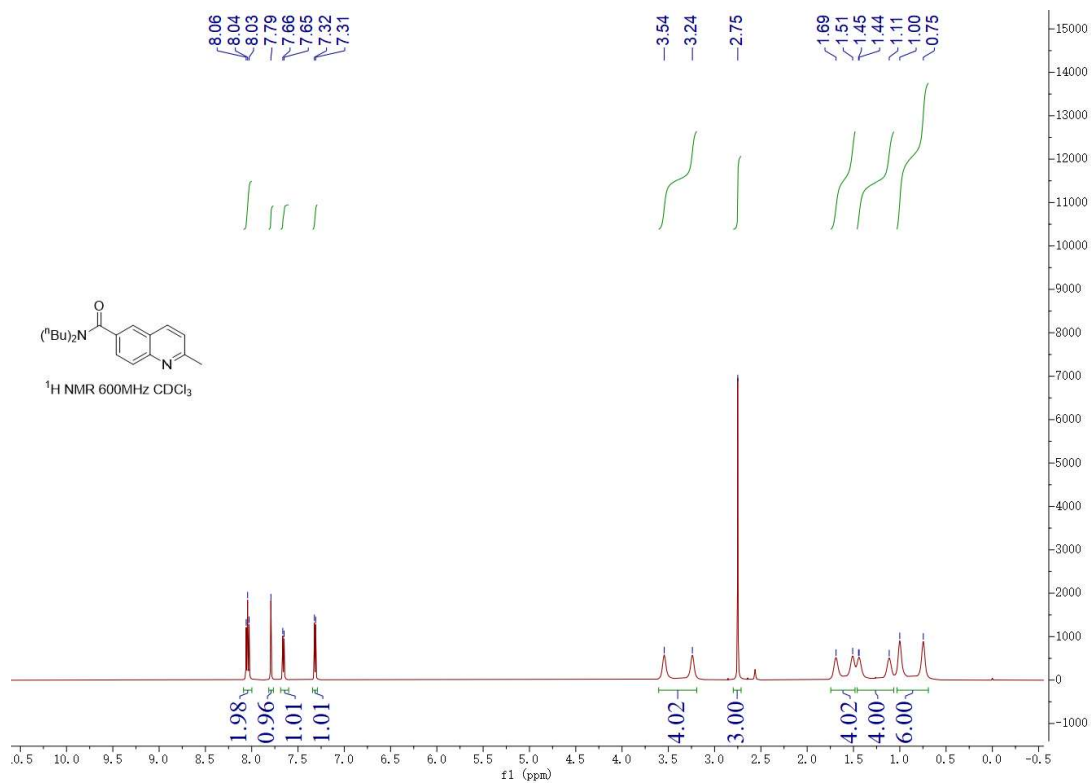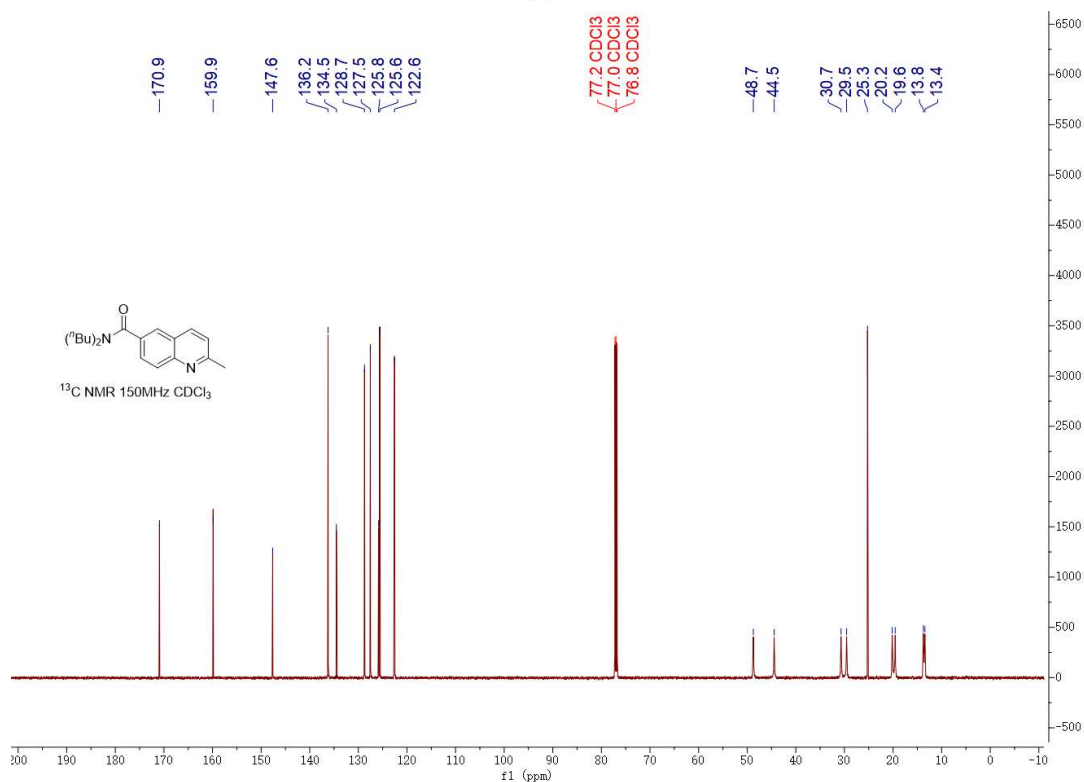

# (2-methylquinolin-6-yl)(morpholino)methanone (1)

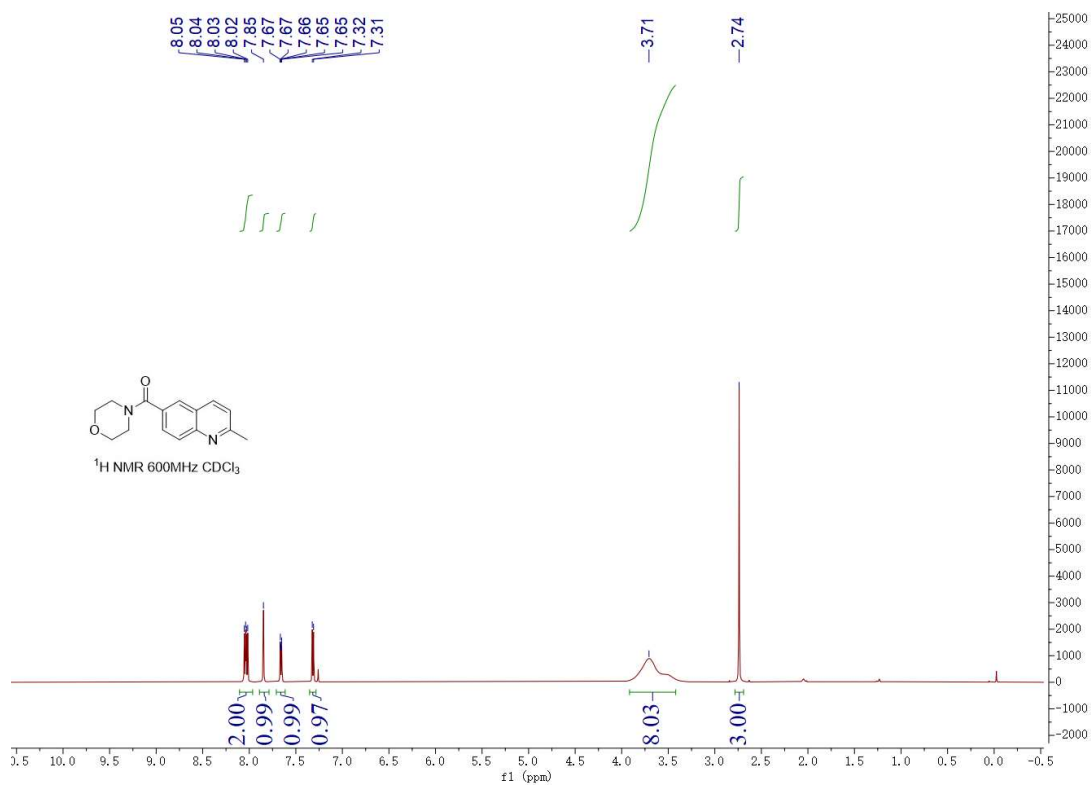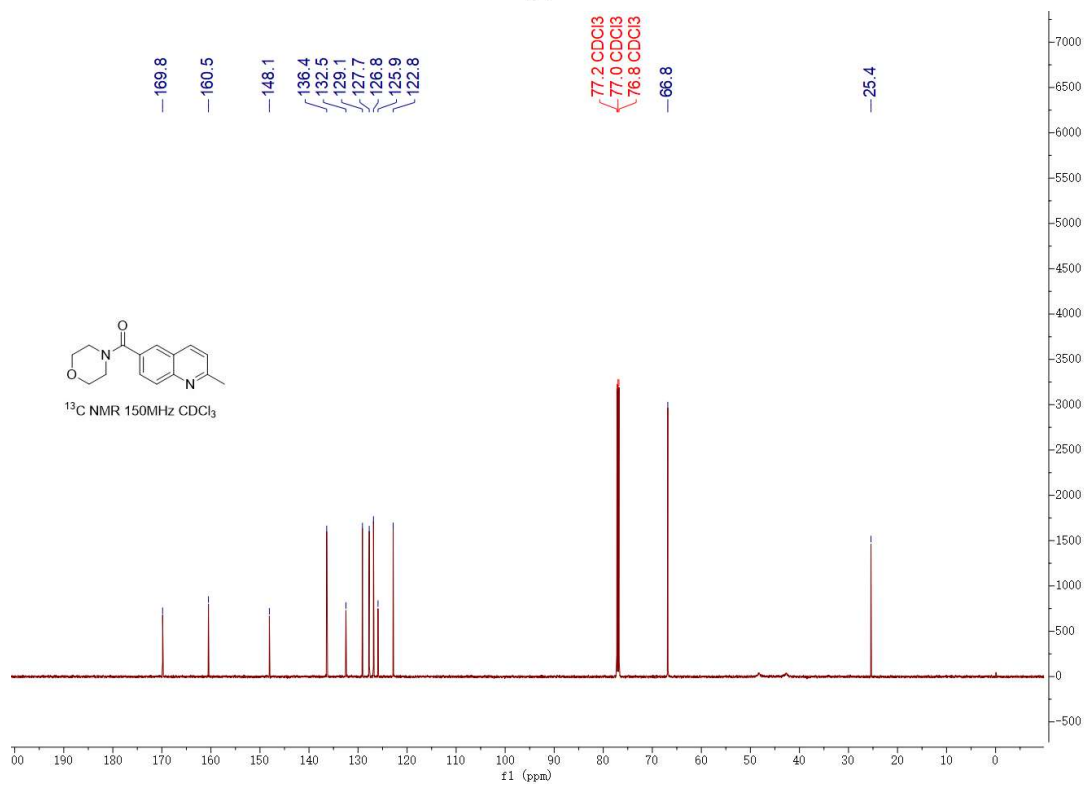

**(2-methylquinolin-6-yl)(pyrrolidin-1-yl)methanone (1m):**

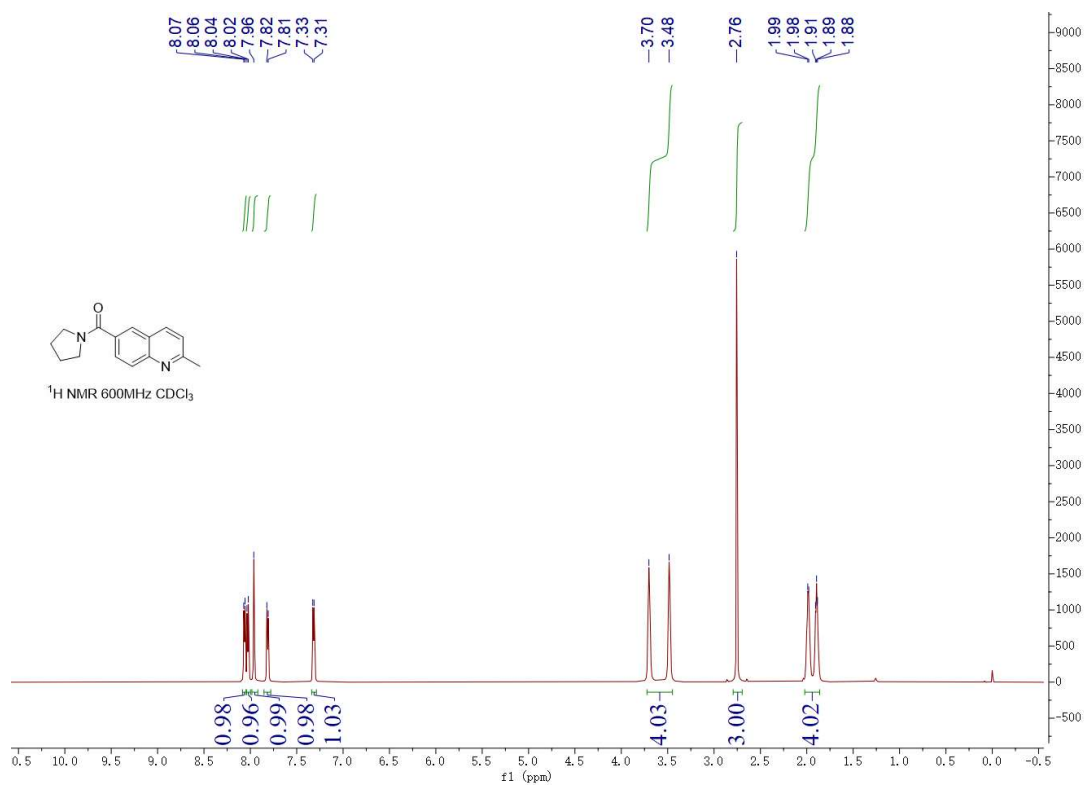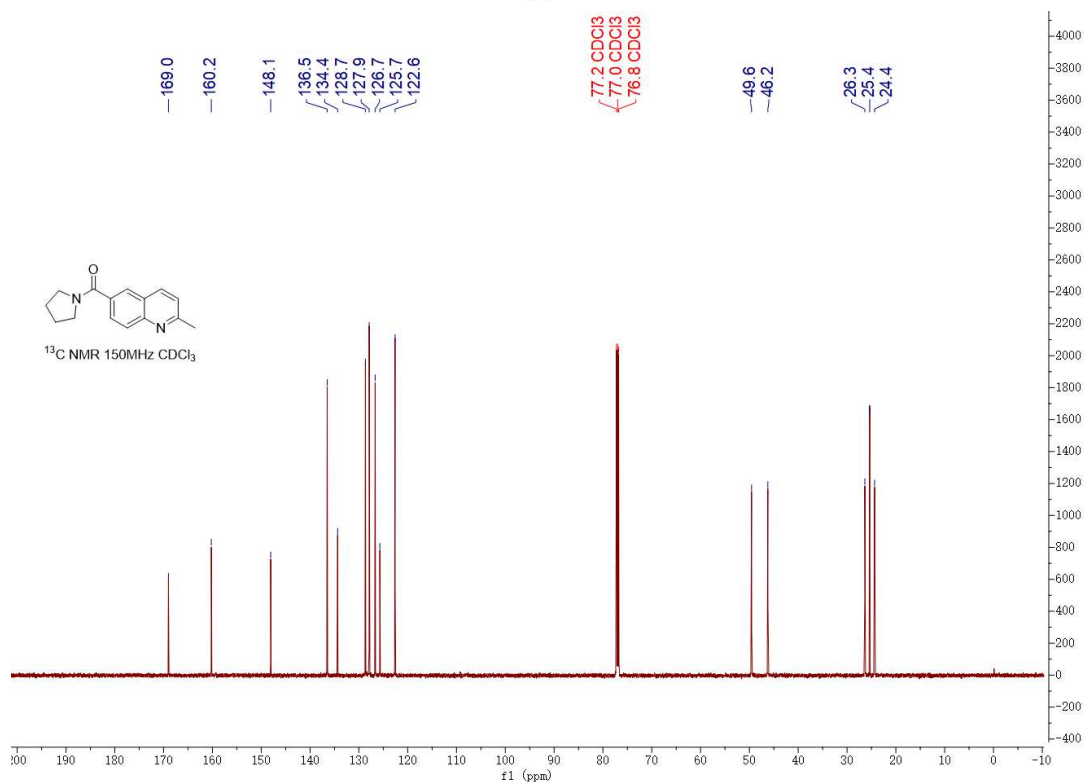

**(S)-2-methyl-1,2,3,4-tetrahydroquinoline (2a):**

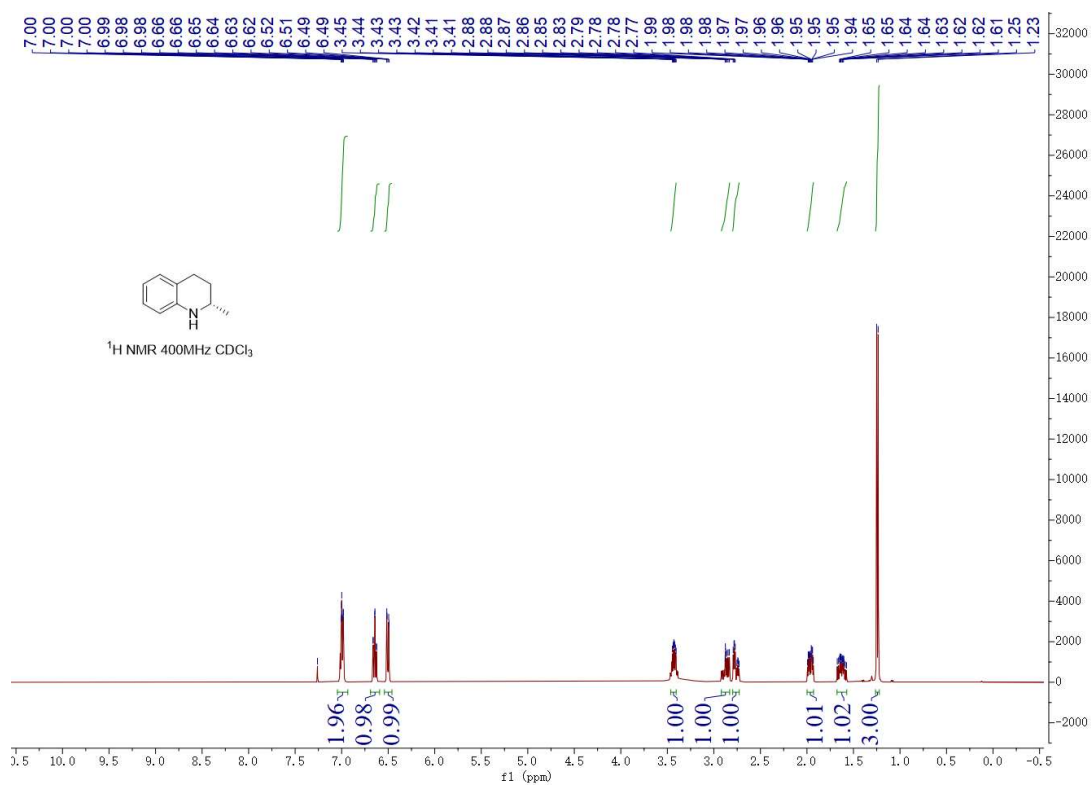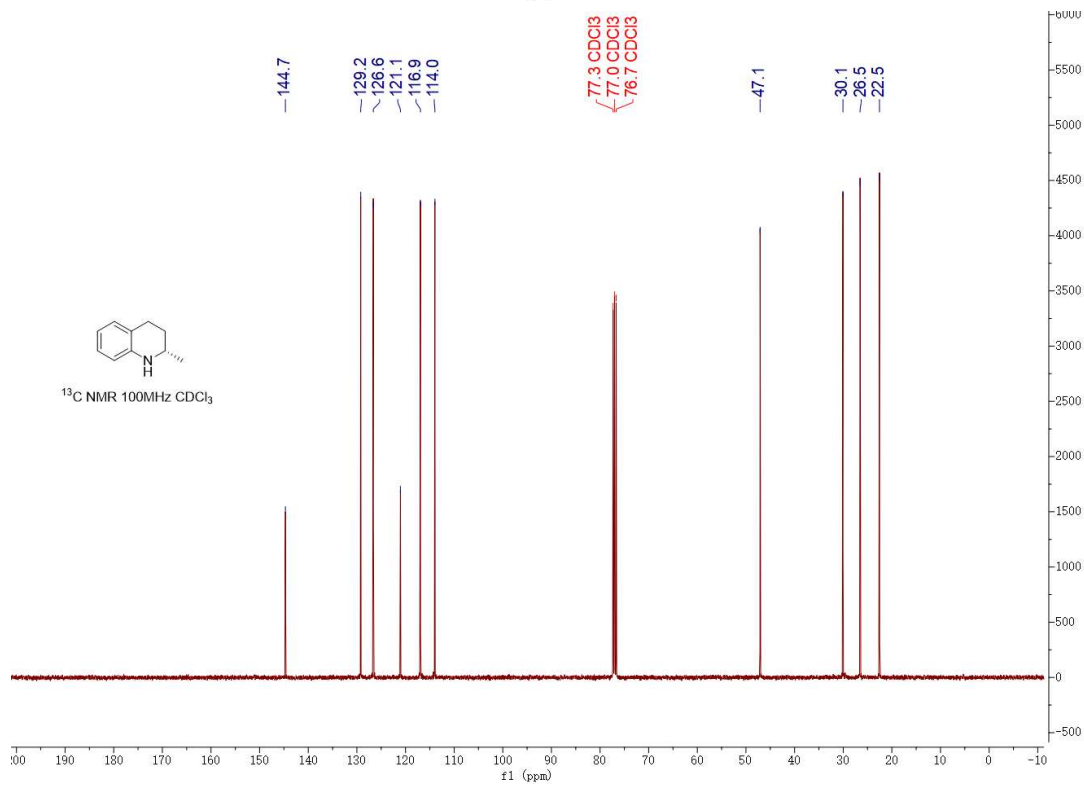

**(S)-6-fluoro-2-methyl-1,2,3,4-tetrahydroquinoline (2b):**

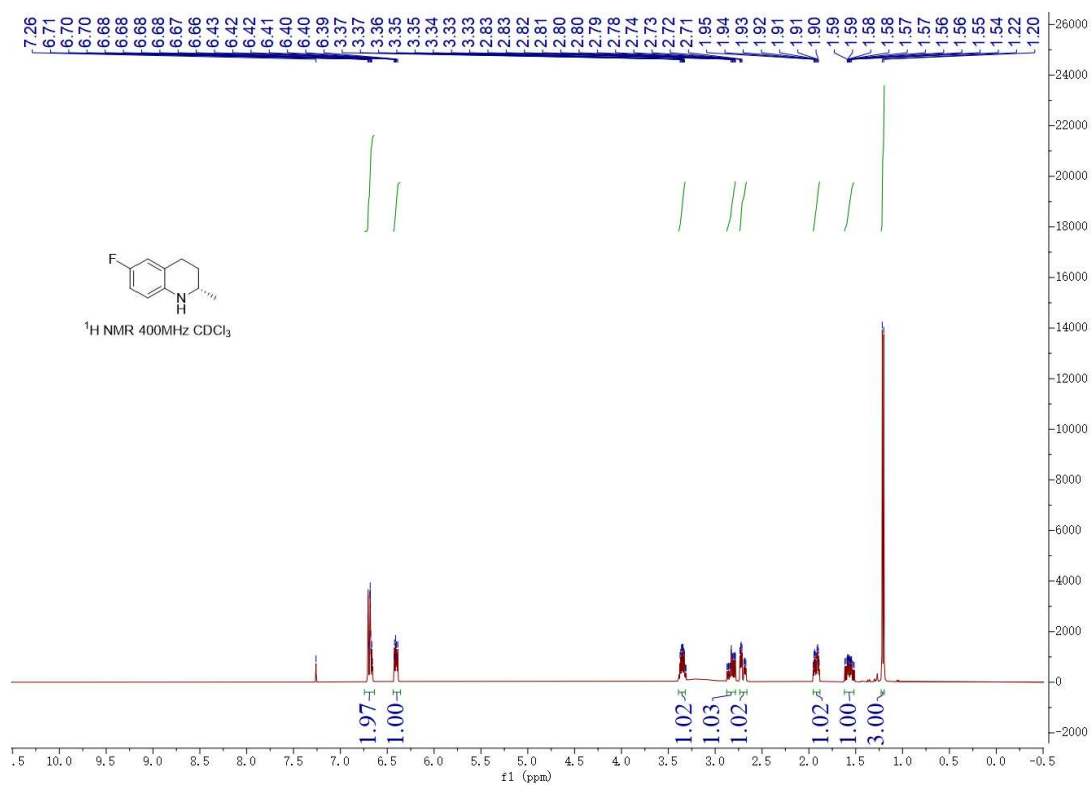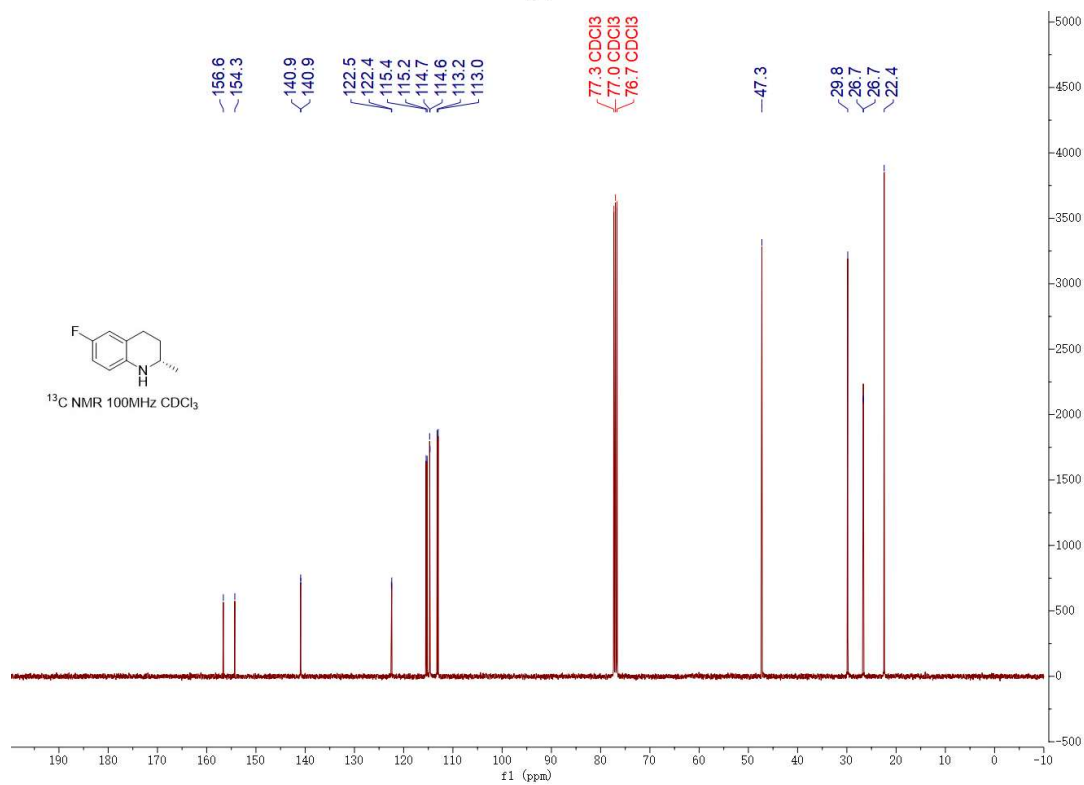



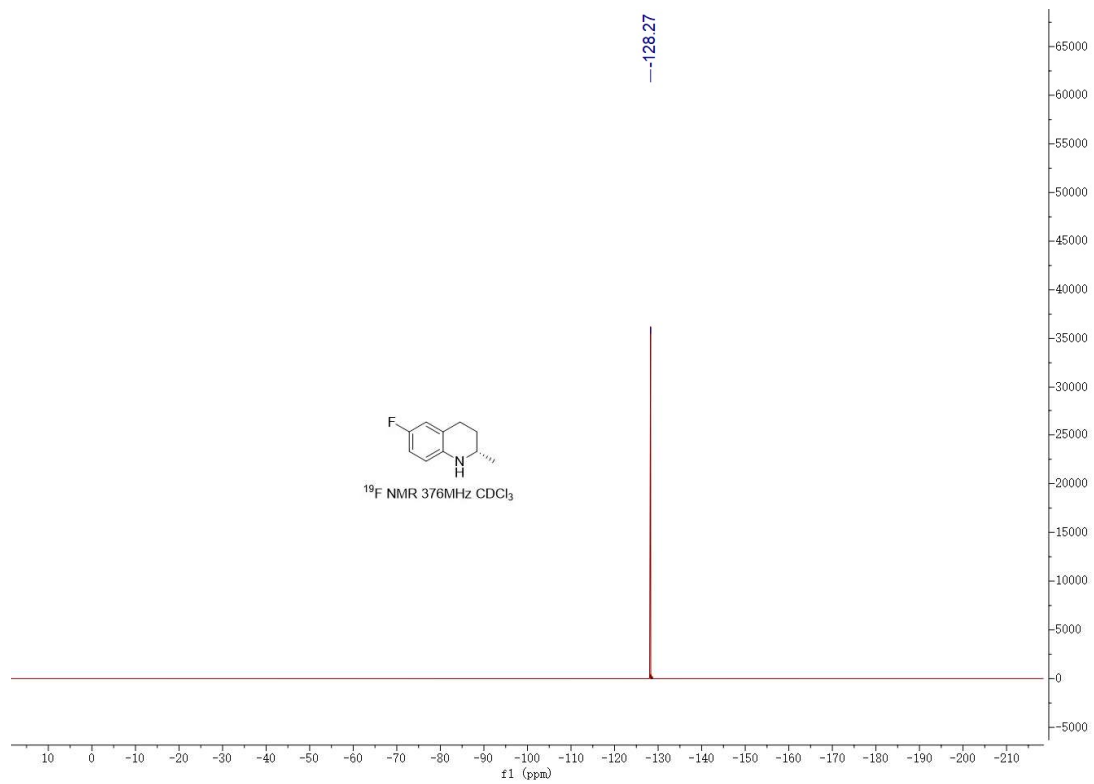

**(S)-6-chloro-2-methyl-1,2,3,4-tetrahydroquinoline (2c):**

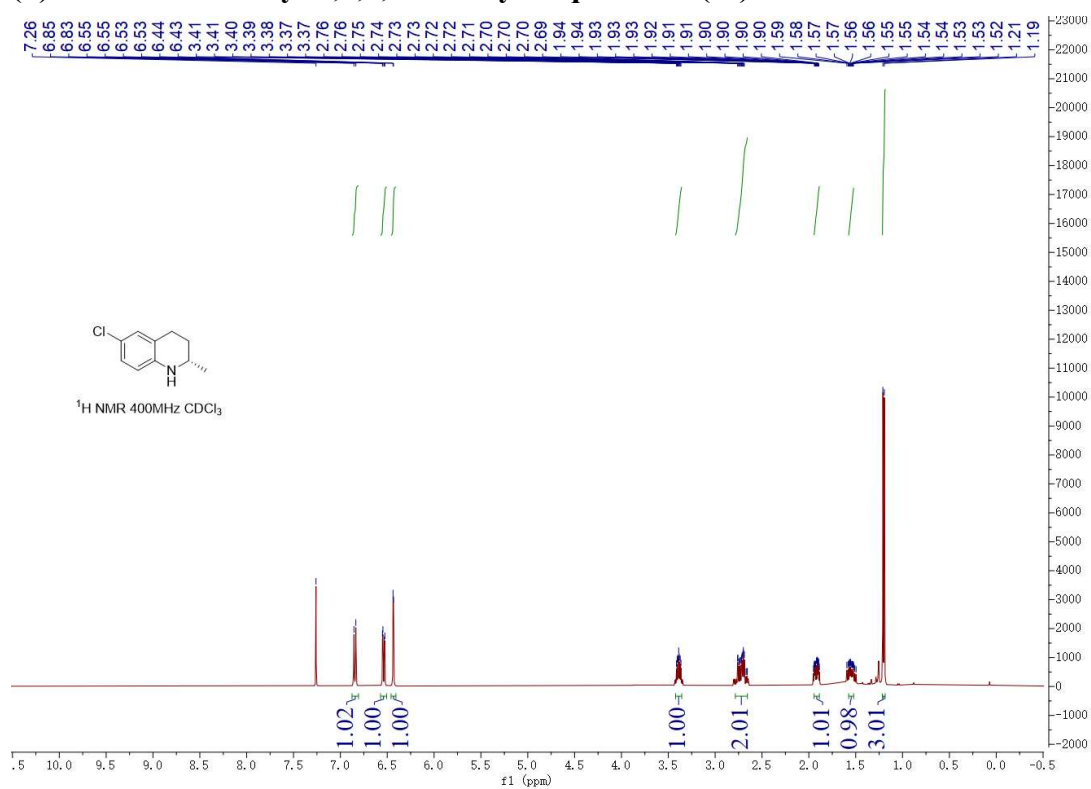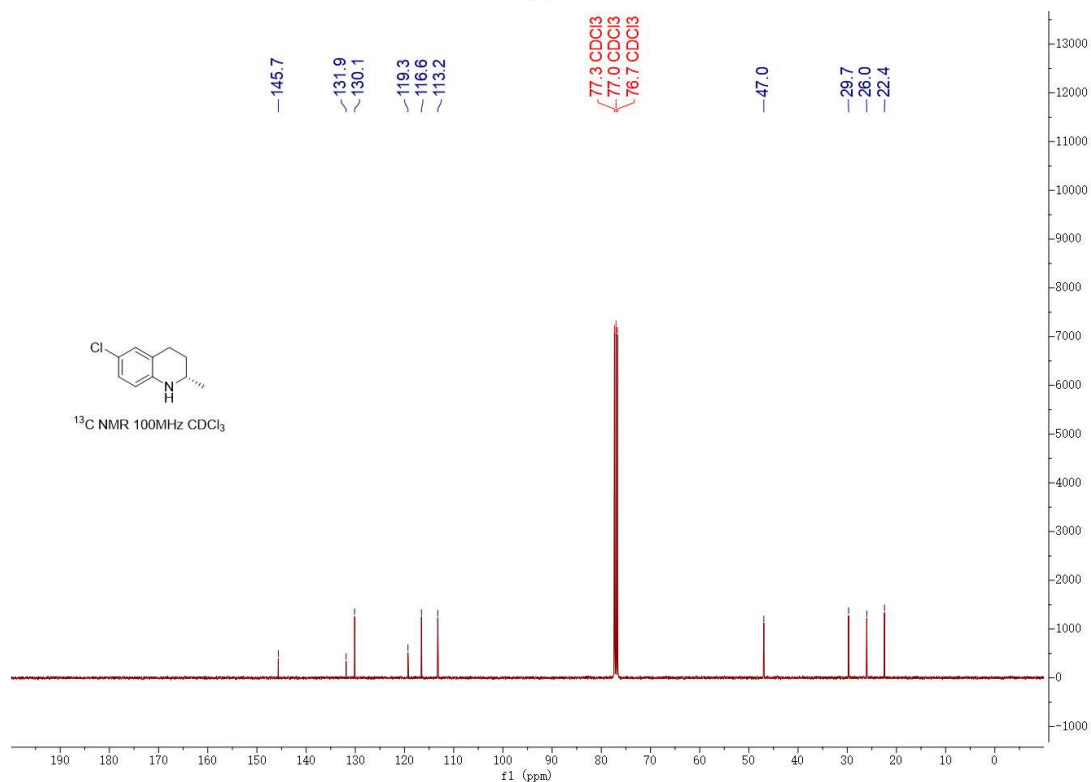

**(S)-6-bromo-2-methyl-1,2,3,4-tetrahydroquinoline (2d):**

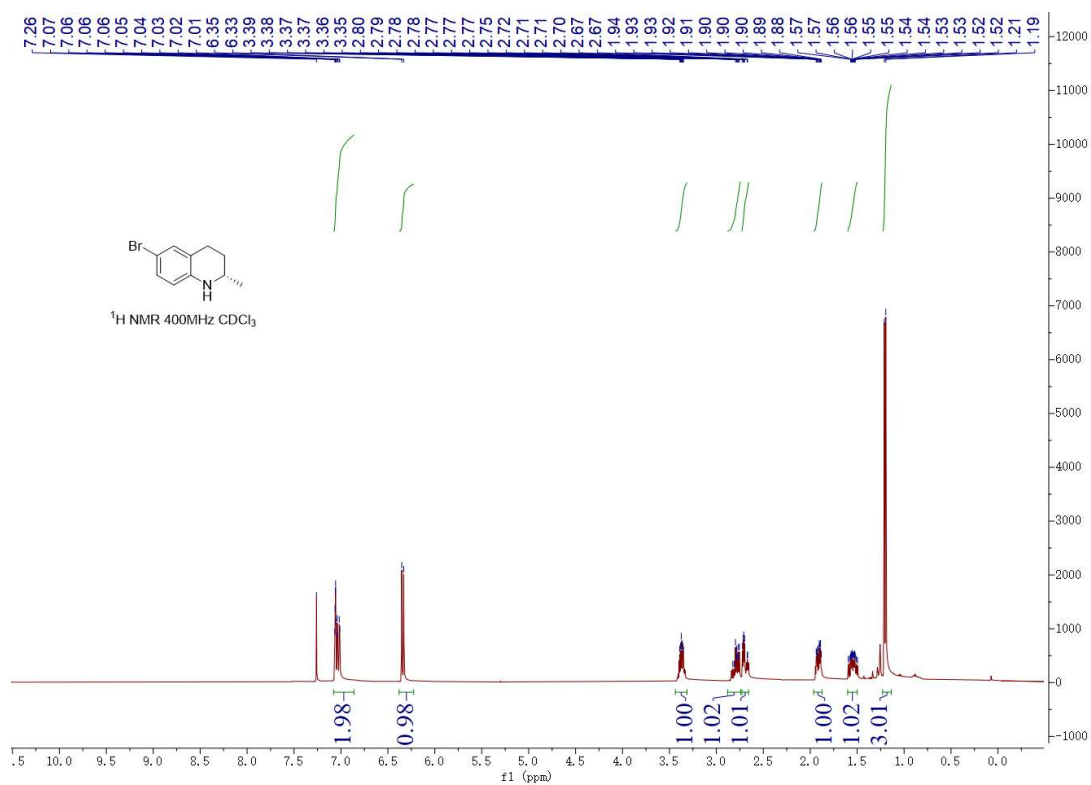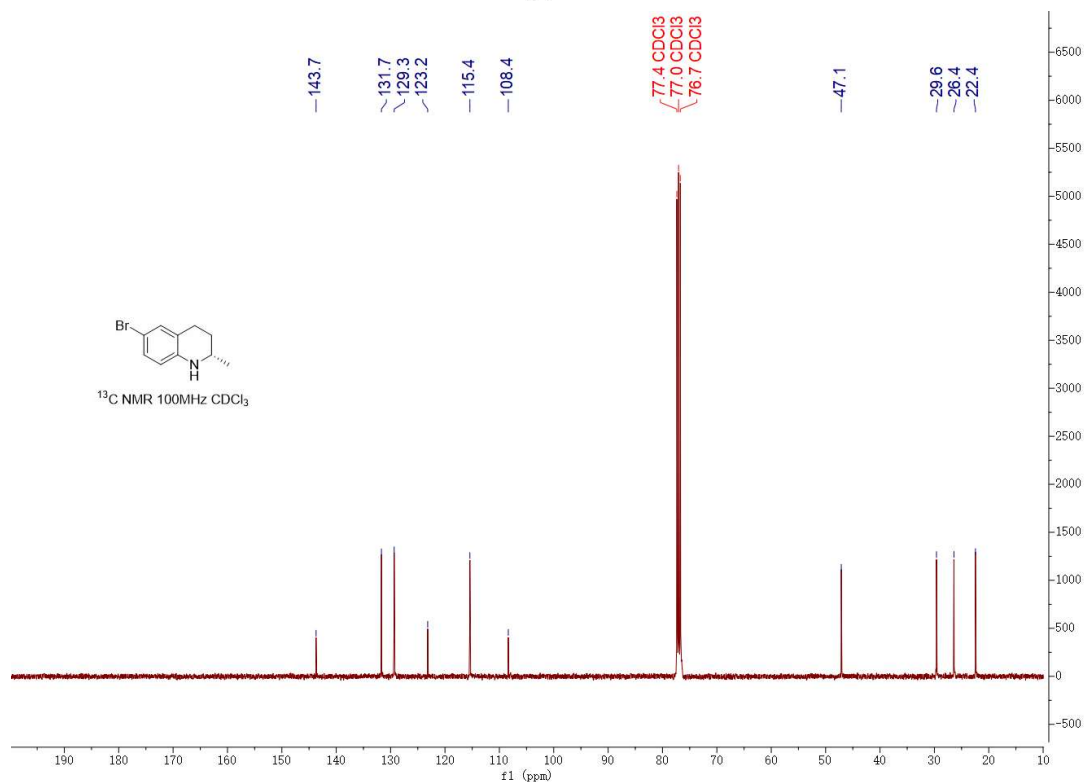

**(S)-6-iodo-2-methyl-1,2,3,4-tetrahydroquinoline (2e):**

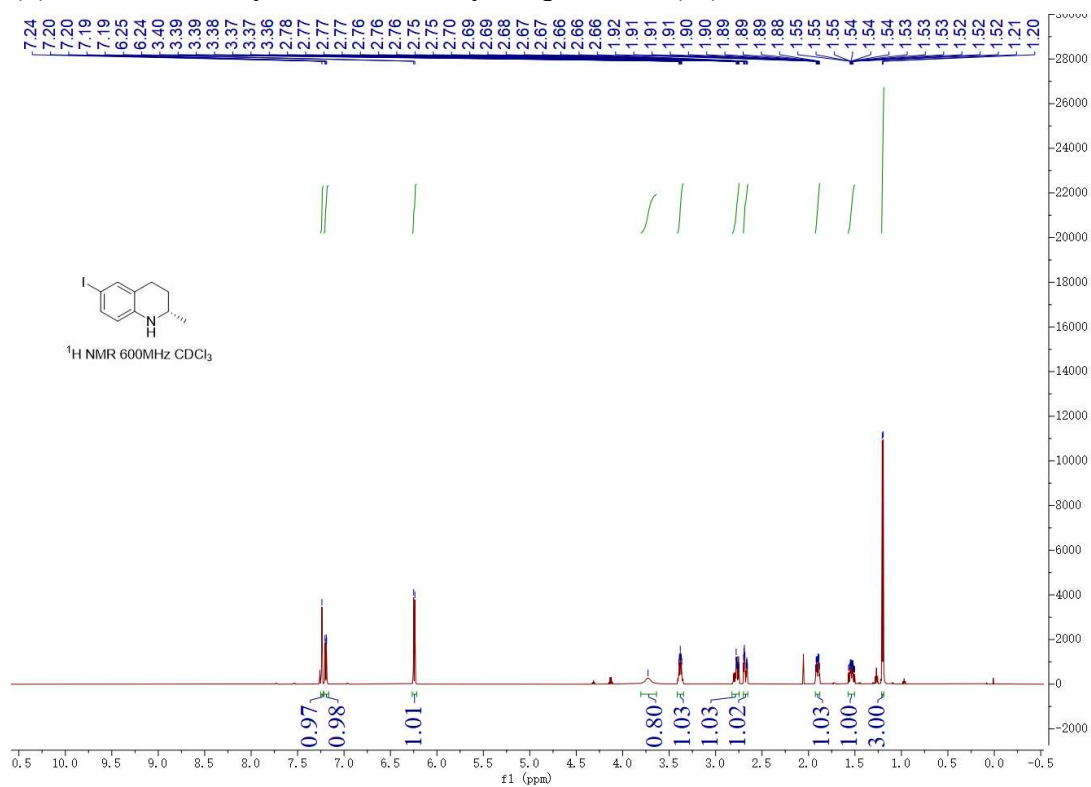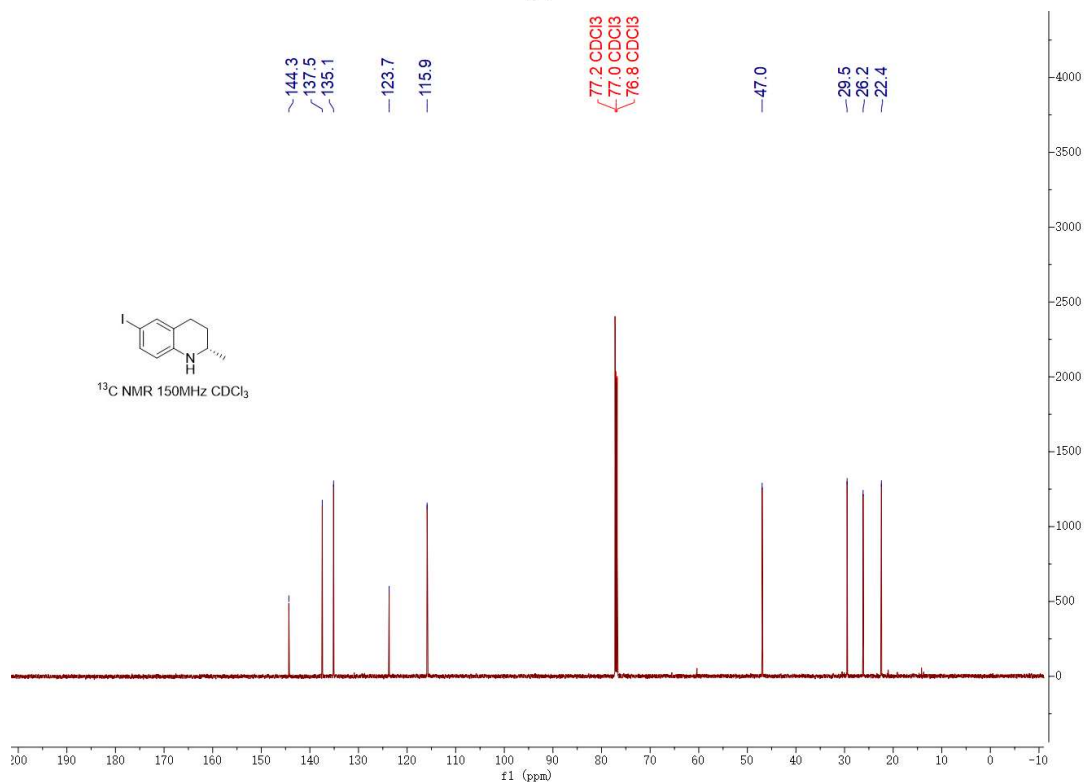

**(S)-7-chloro-2-methyl-1,2,3,4-tetrahydroquinoline (2f):**

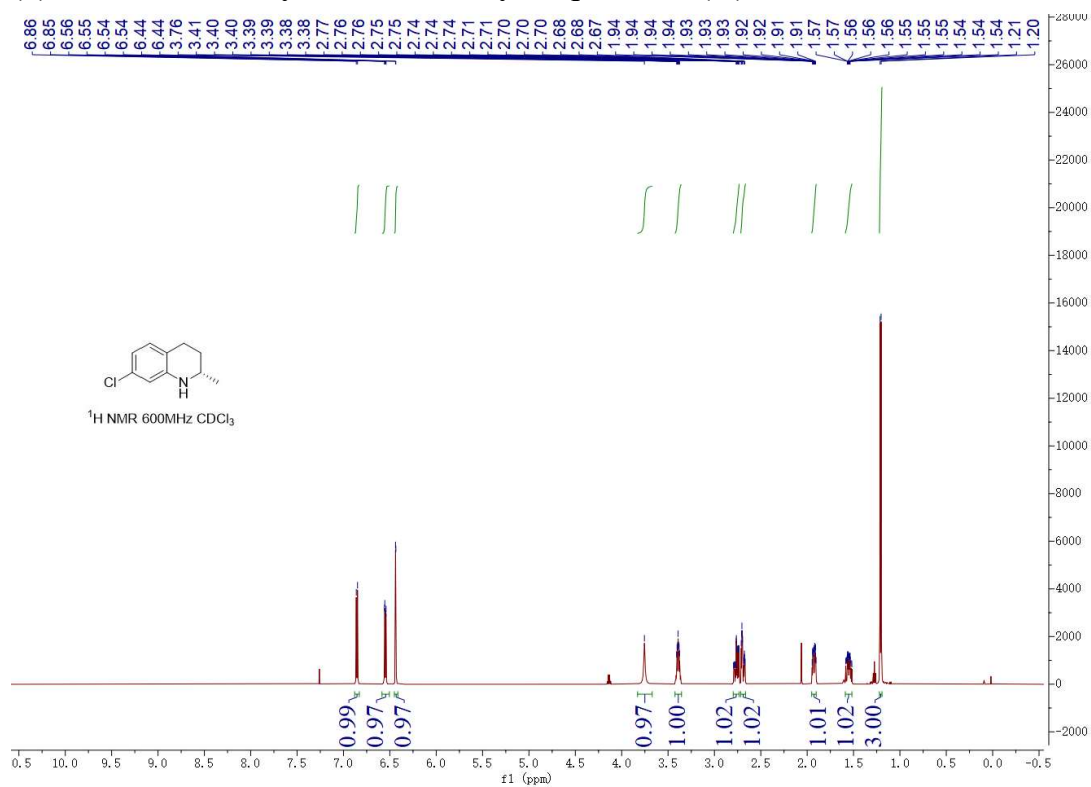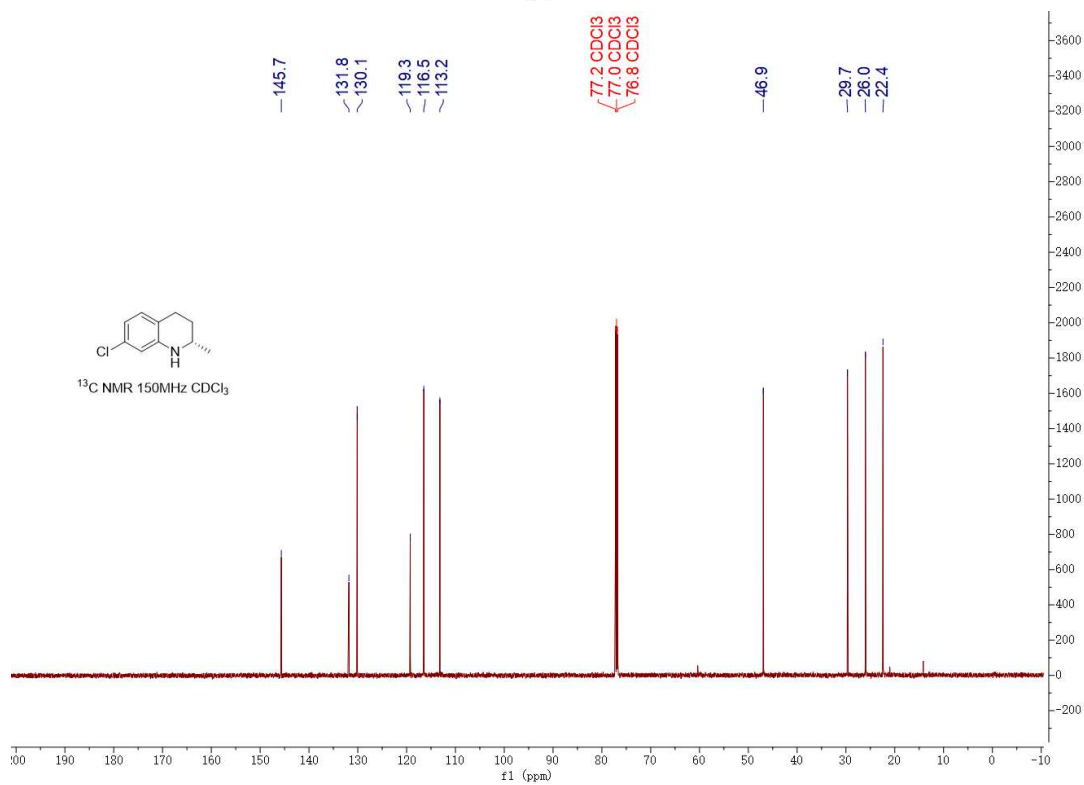

**(S)-6-methoxy-2-methyl-1,2,3,4-tetrahydroquinoline (2g):**

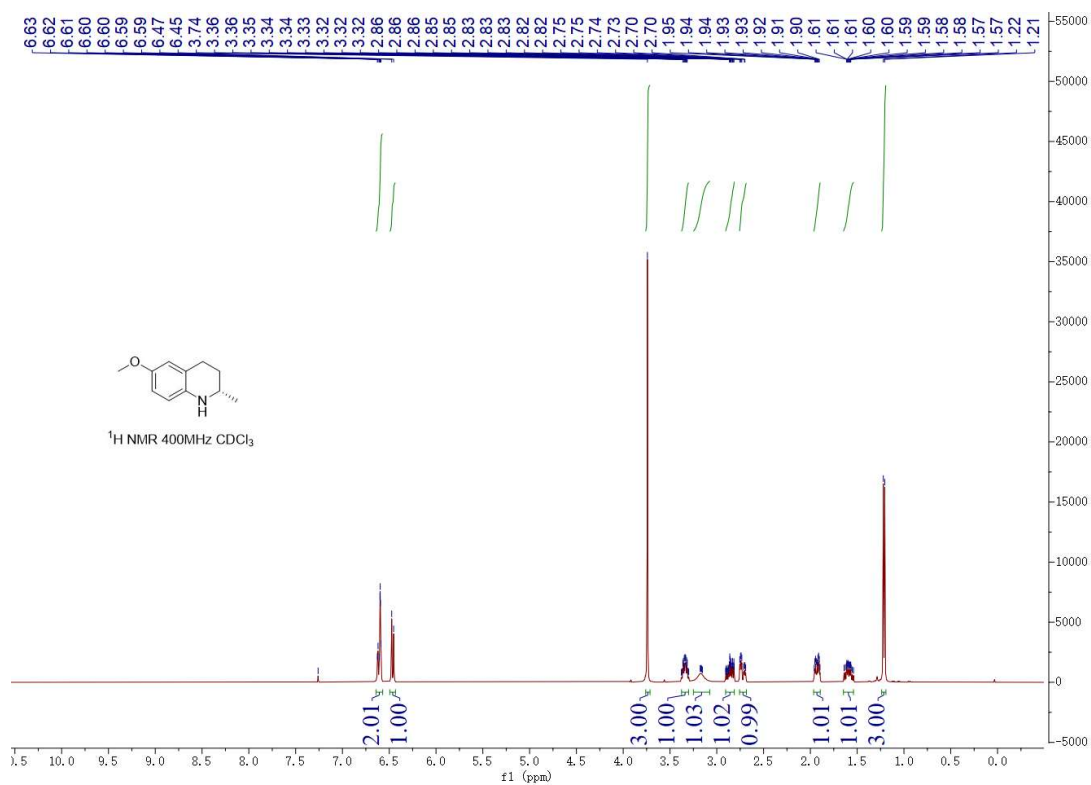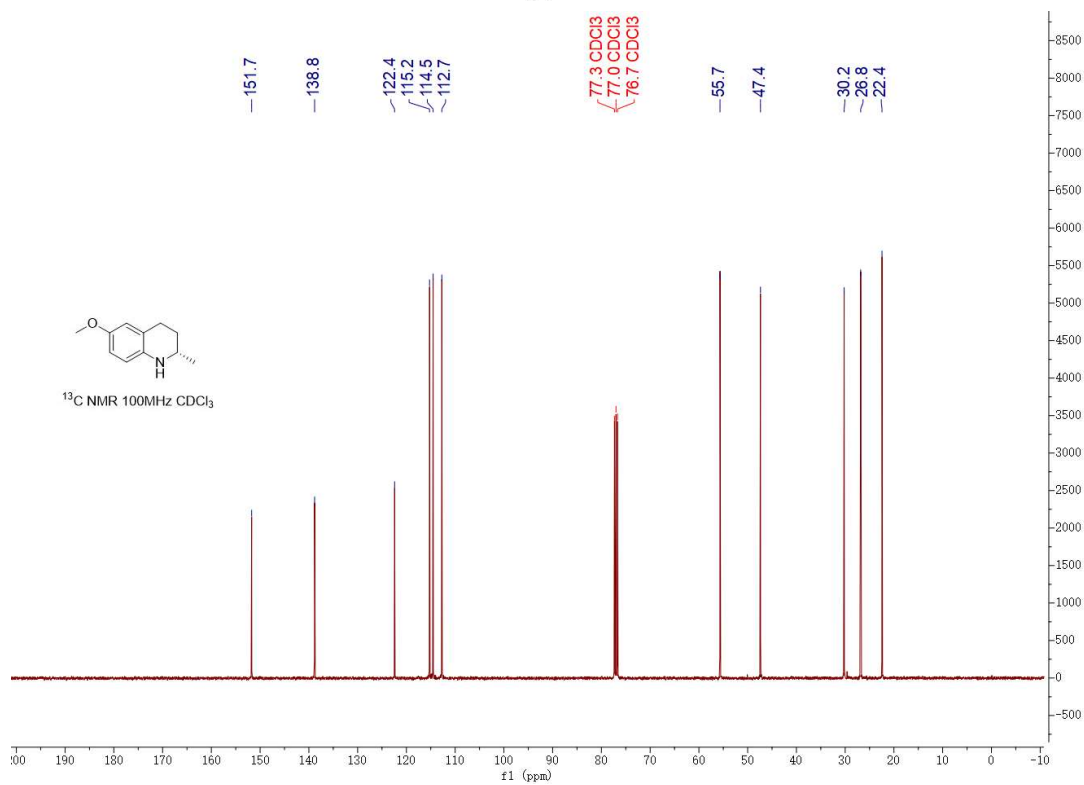

**(S)-2-methyl-6-phenyl-1,2,3,4-tetrahydroquinoline (2h):**

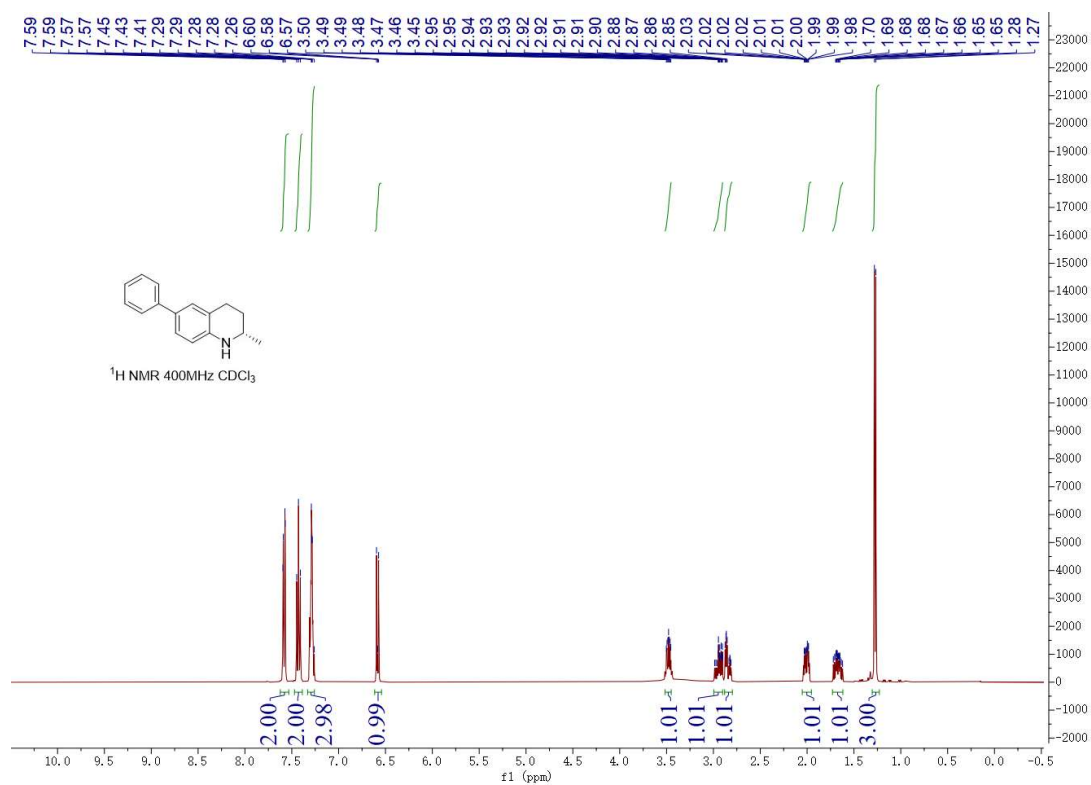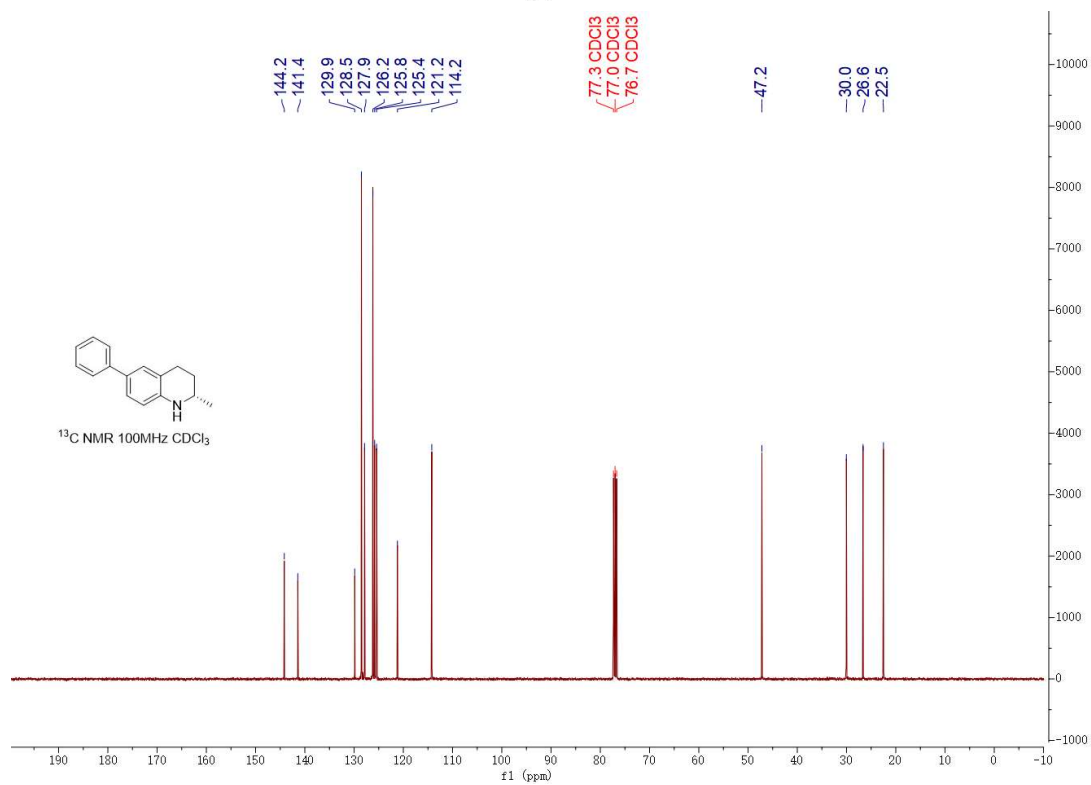

**(S)-2-methyl-6-(pyridin-4-yl)-1,2,3,4-tetrahydroquinoline (2i):**

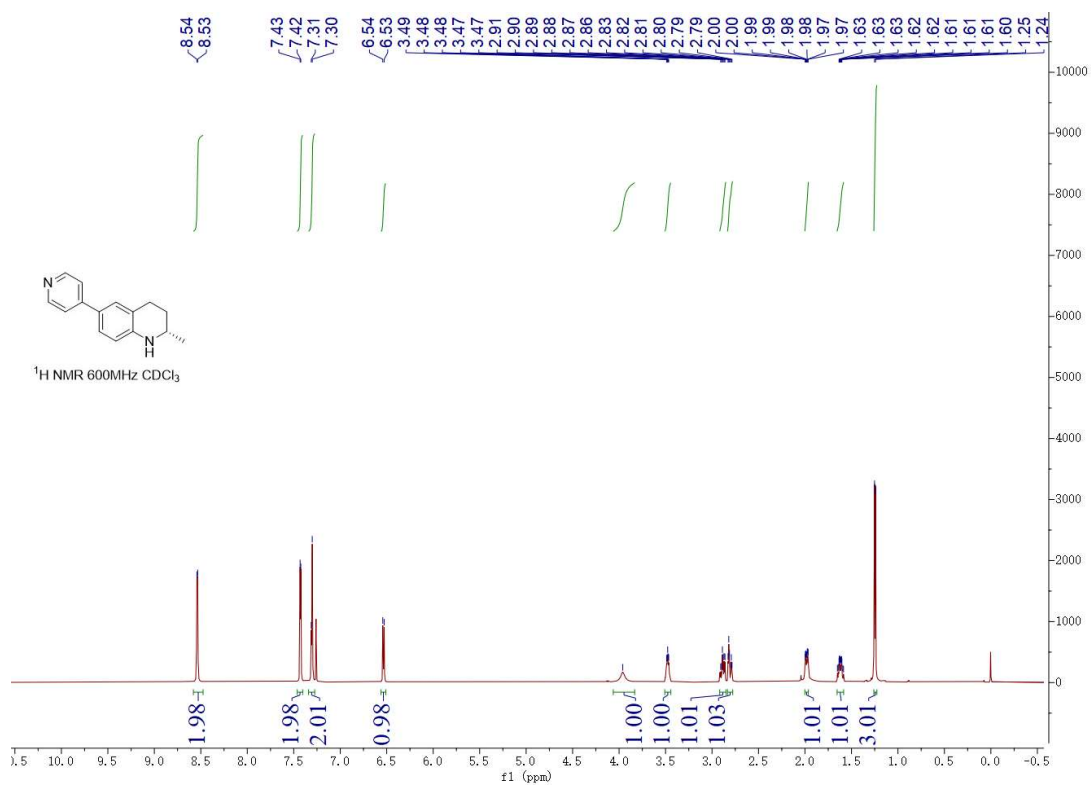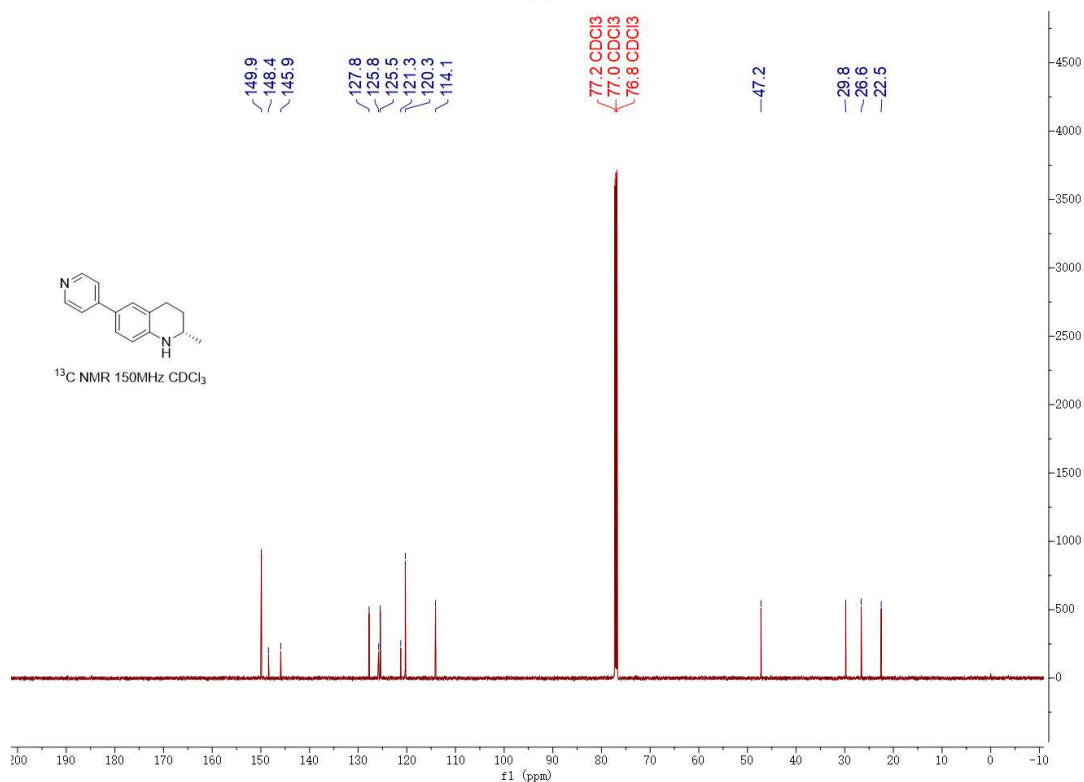



**(S)-2-methyl-6-(thiophen-2-yl)-1,2,3,4-tetrahydroquinoline (2j):**

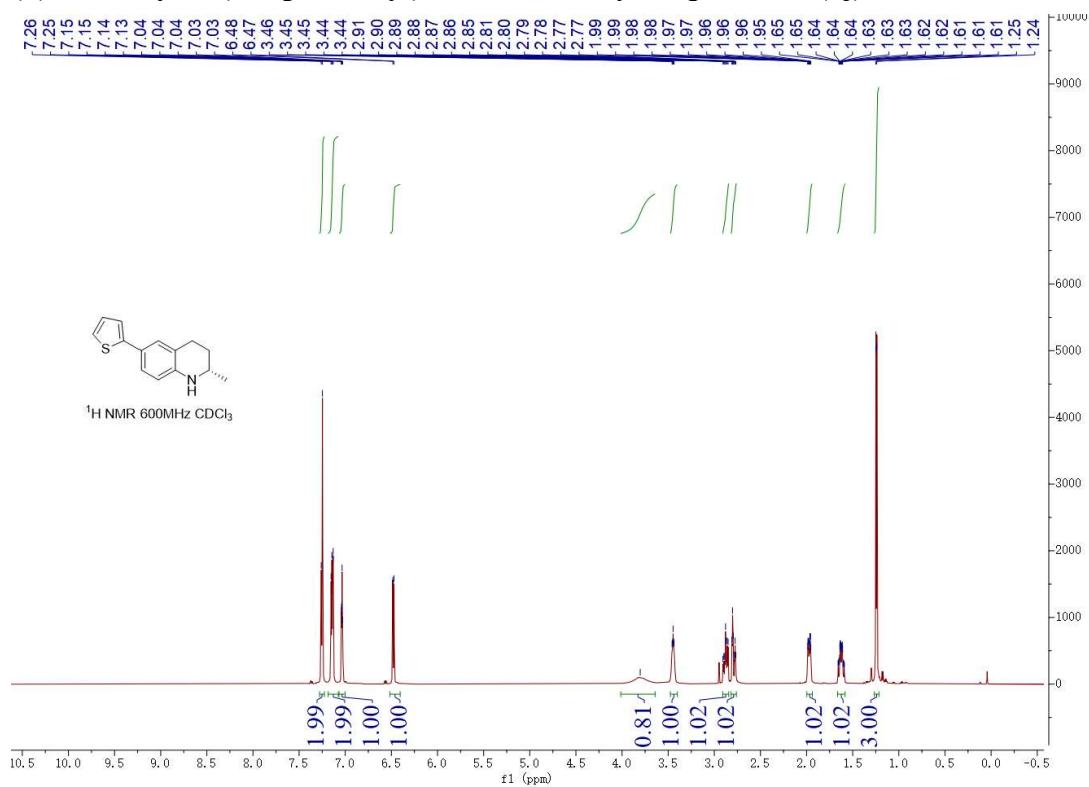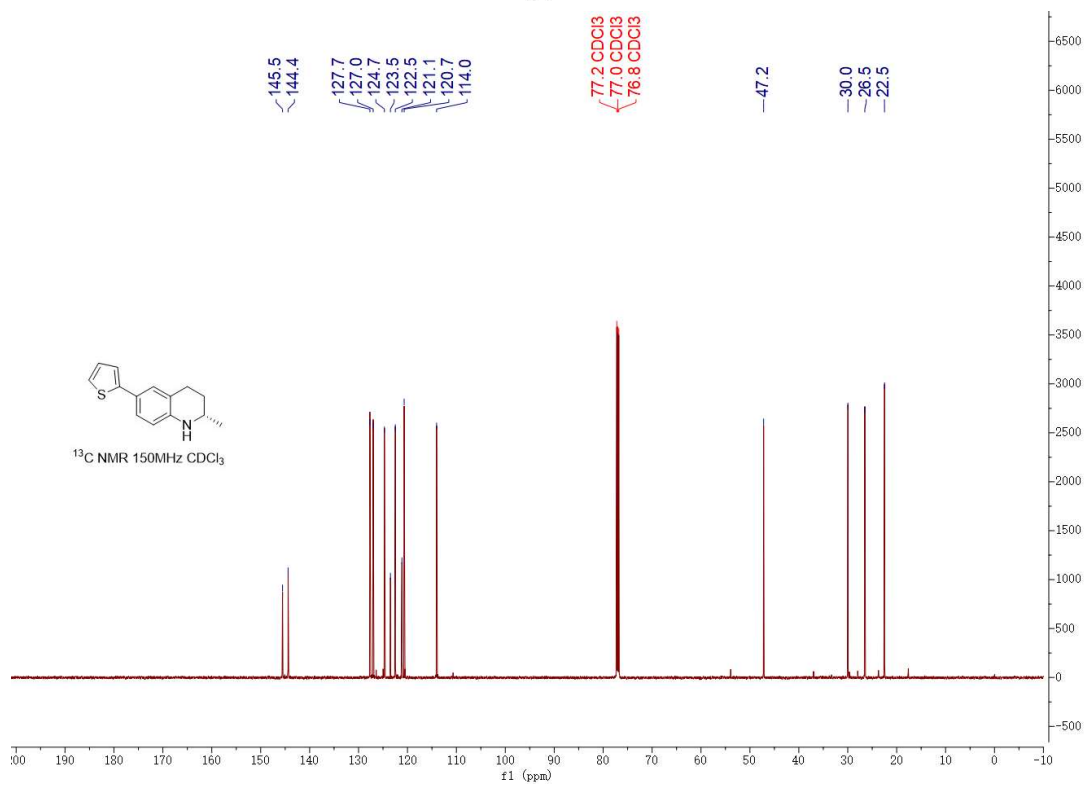

**(S)-N,N-dibutyl-2-methyl-1,2,3,4-tetrahydroquinoline-6-carboxamide (2k):**

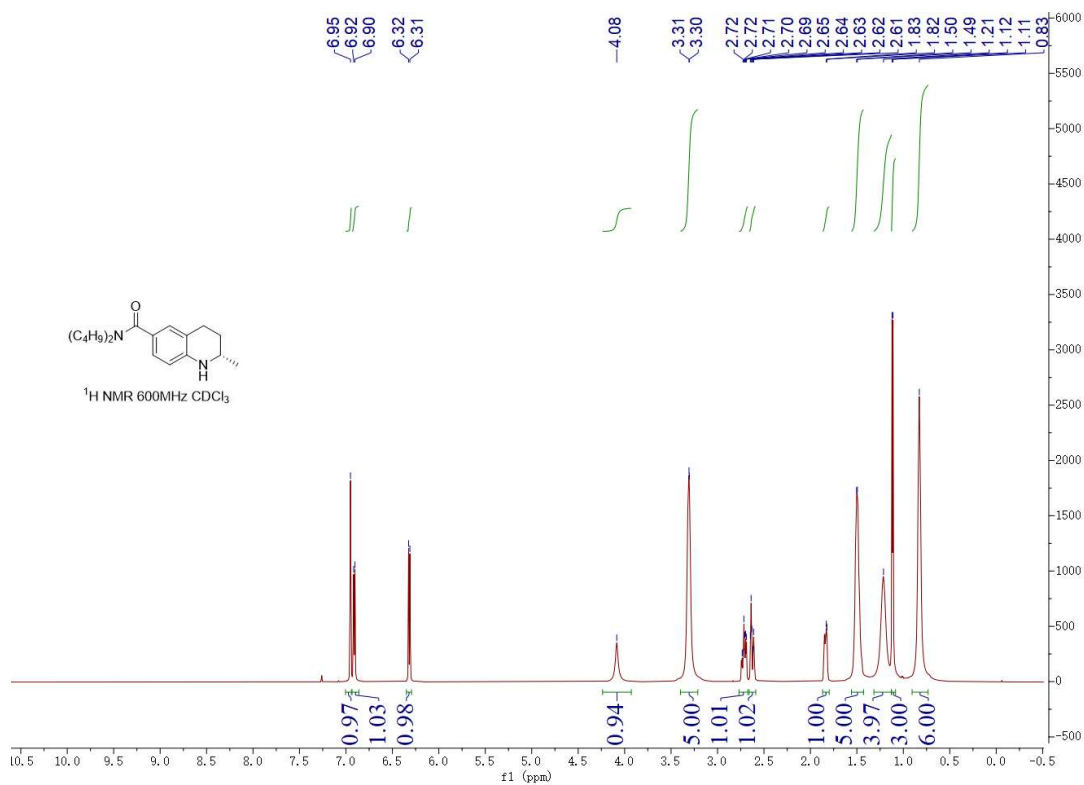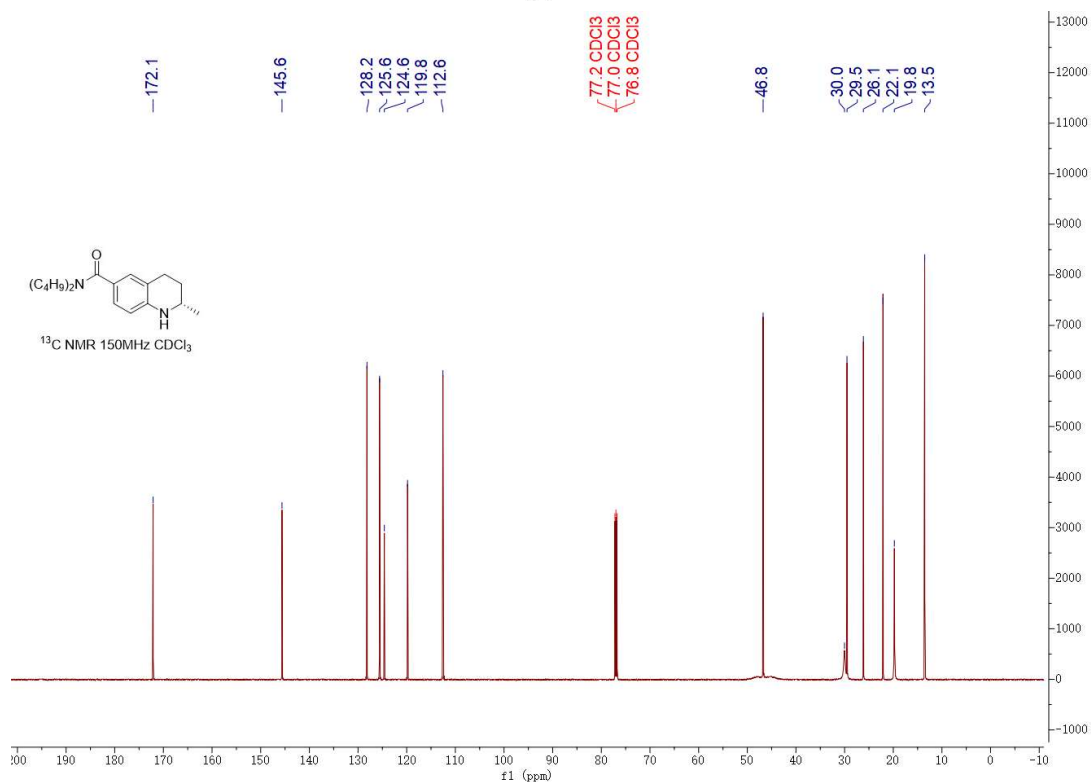

**(S)-(2-methyl-1,2,3,4-tetrahydroquinolin-6-yl)(morpholino)methanone (2l):**

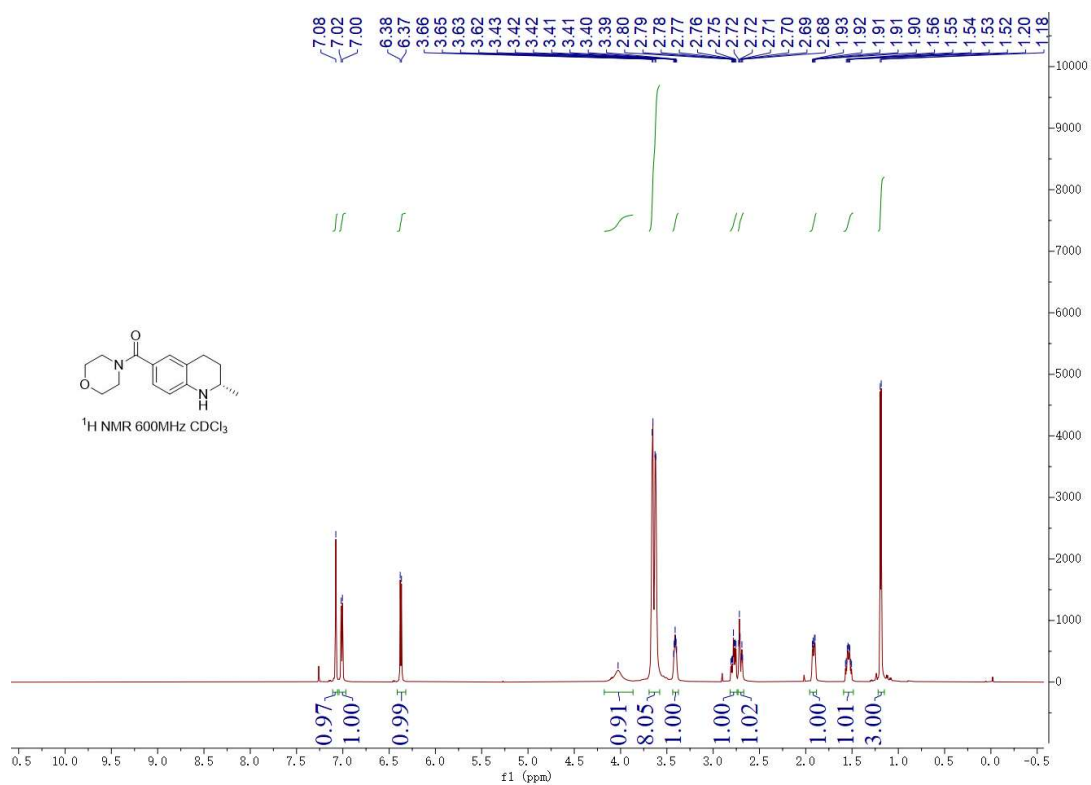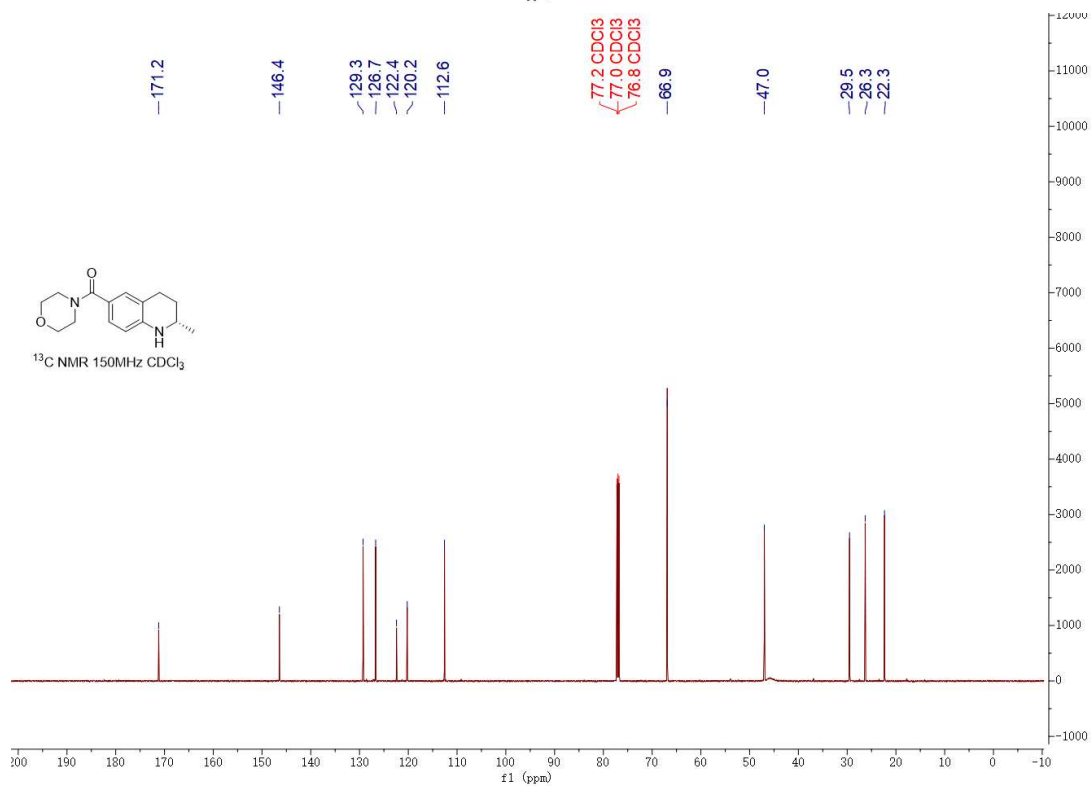

**(S)-(2-methyl-1,2,3,4-tetrahydroquinolin-6-yl)(pyrrolidin-1-yl)methanone (2m):**

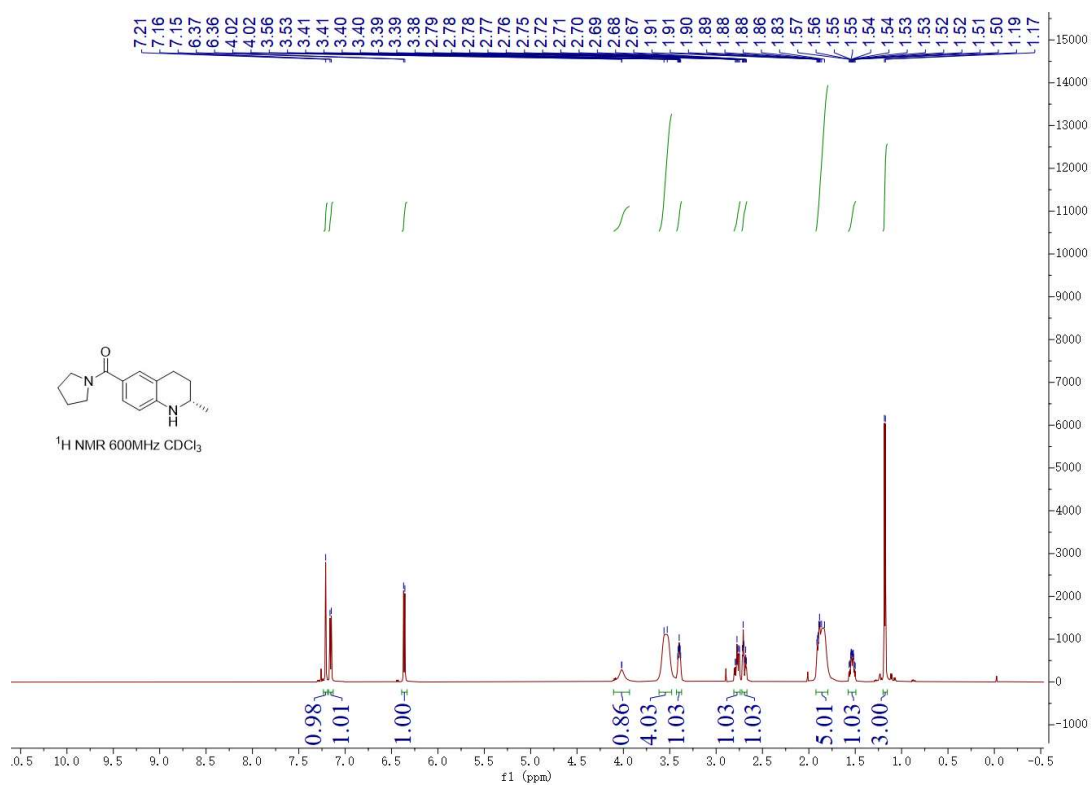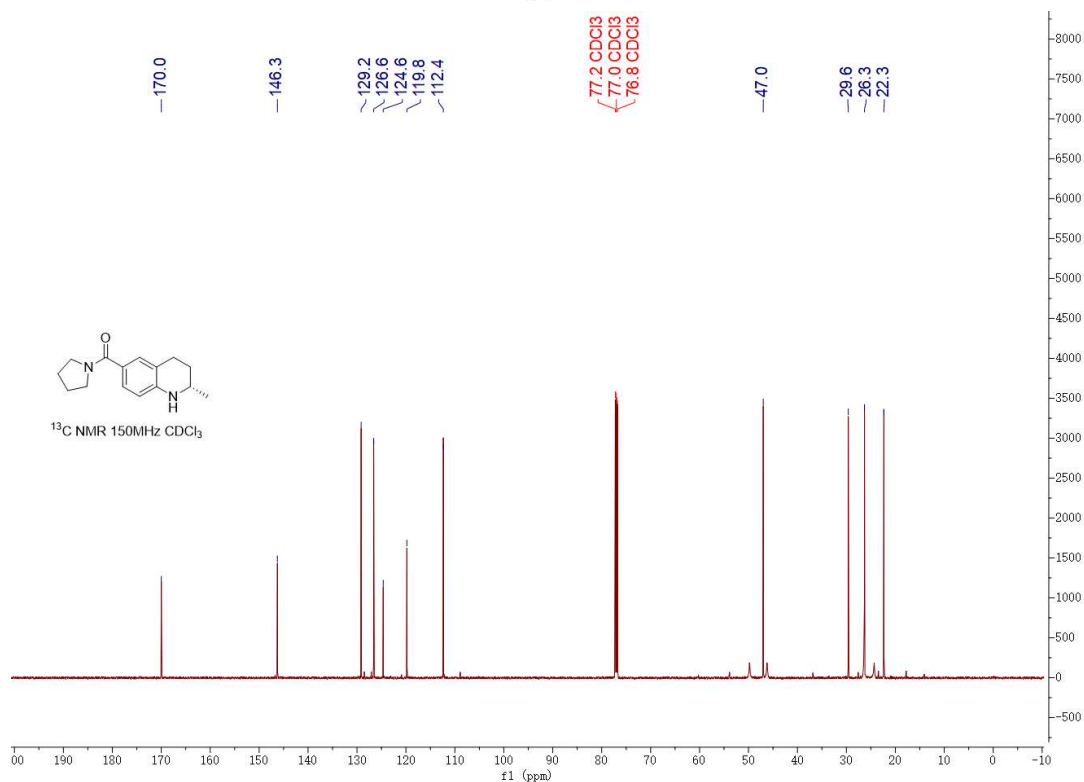

### (S)-2-ethyl-1,2,3,4-tetrahydroquinoline (2n):

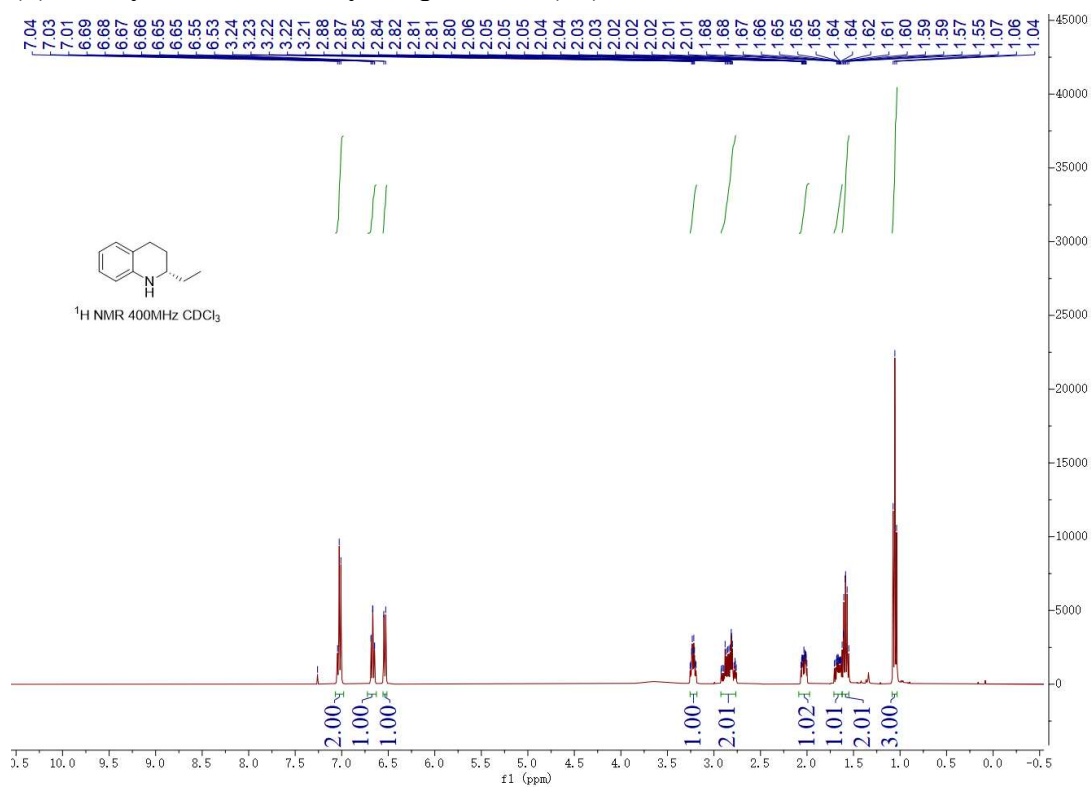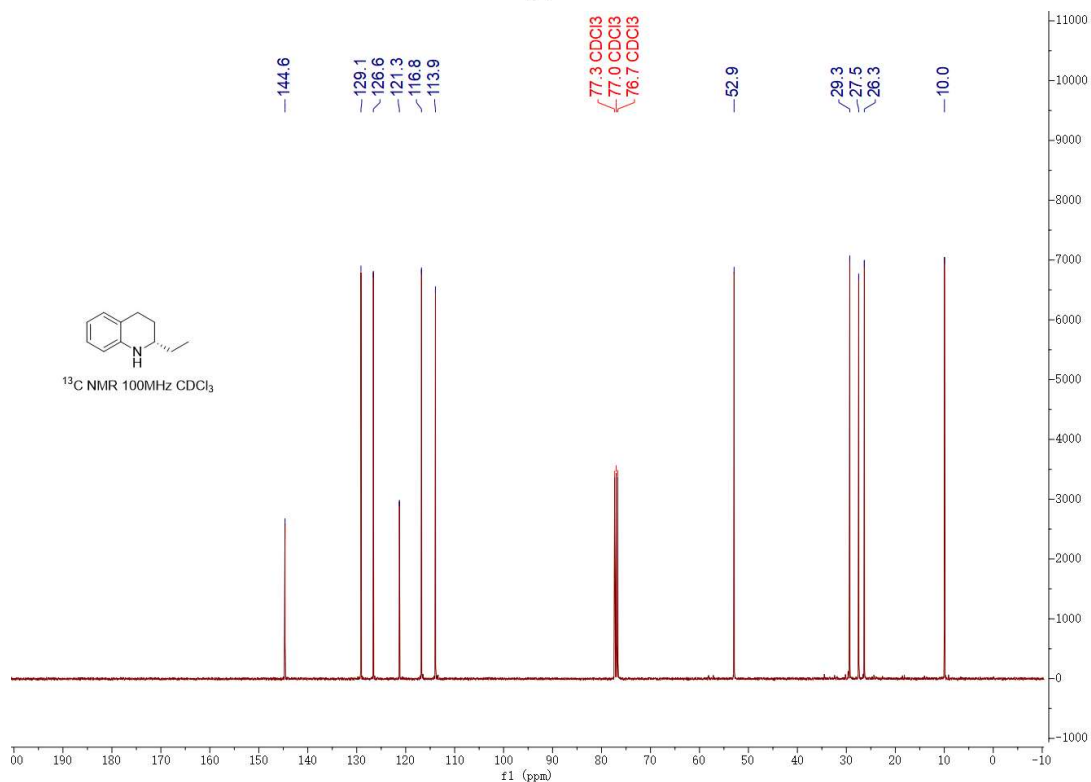

**(S)-2-propyl-1,2,3,4-tetrahydroquinoline (2o):**

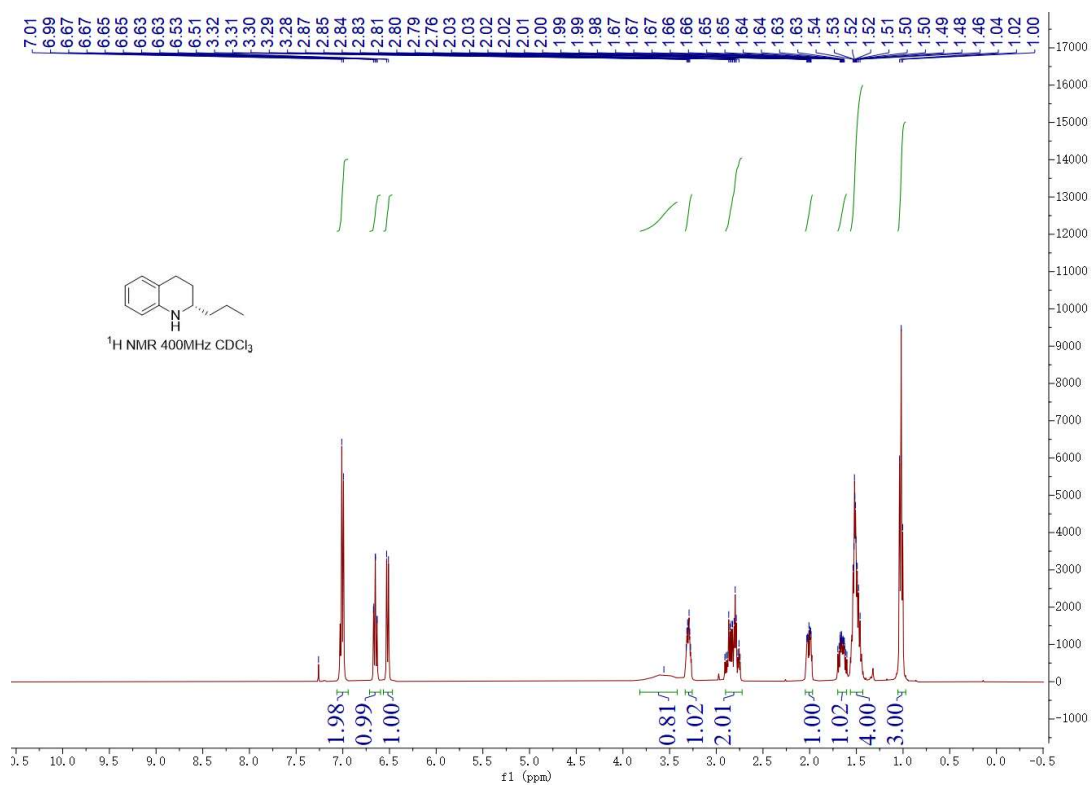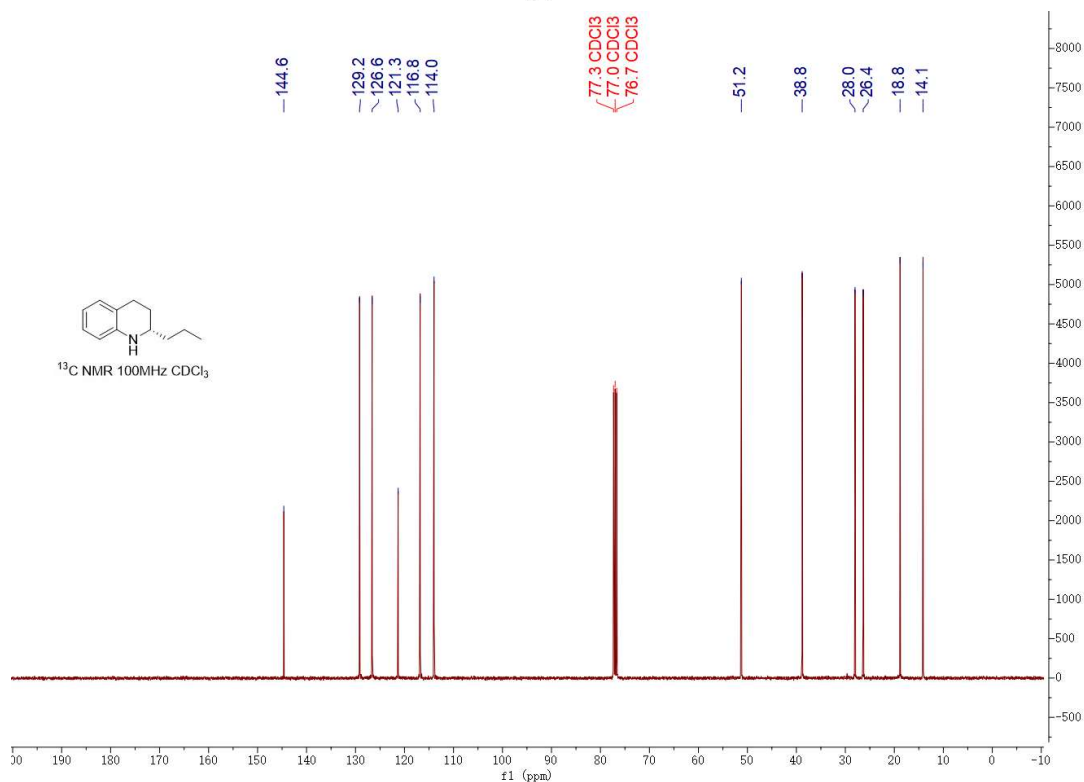

**(S)-2-butyl-1,2,3,4-tetrahydroquinoline (2p):**

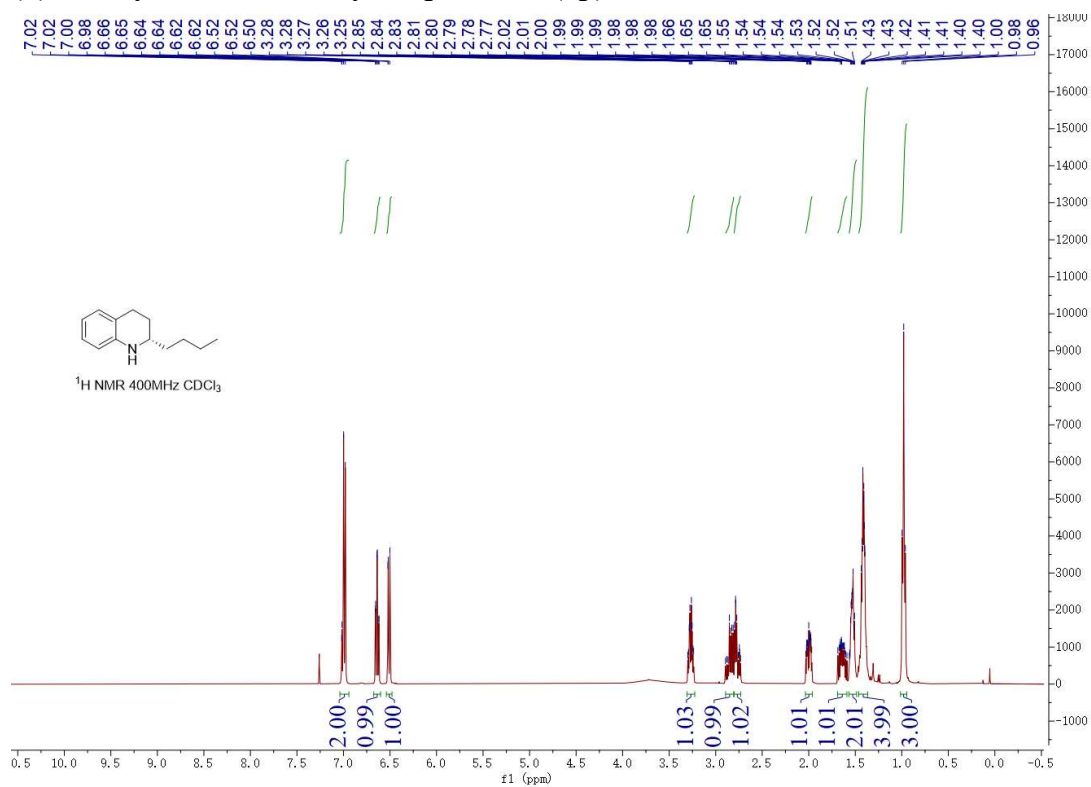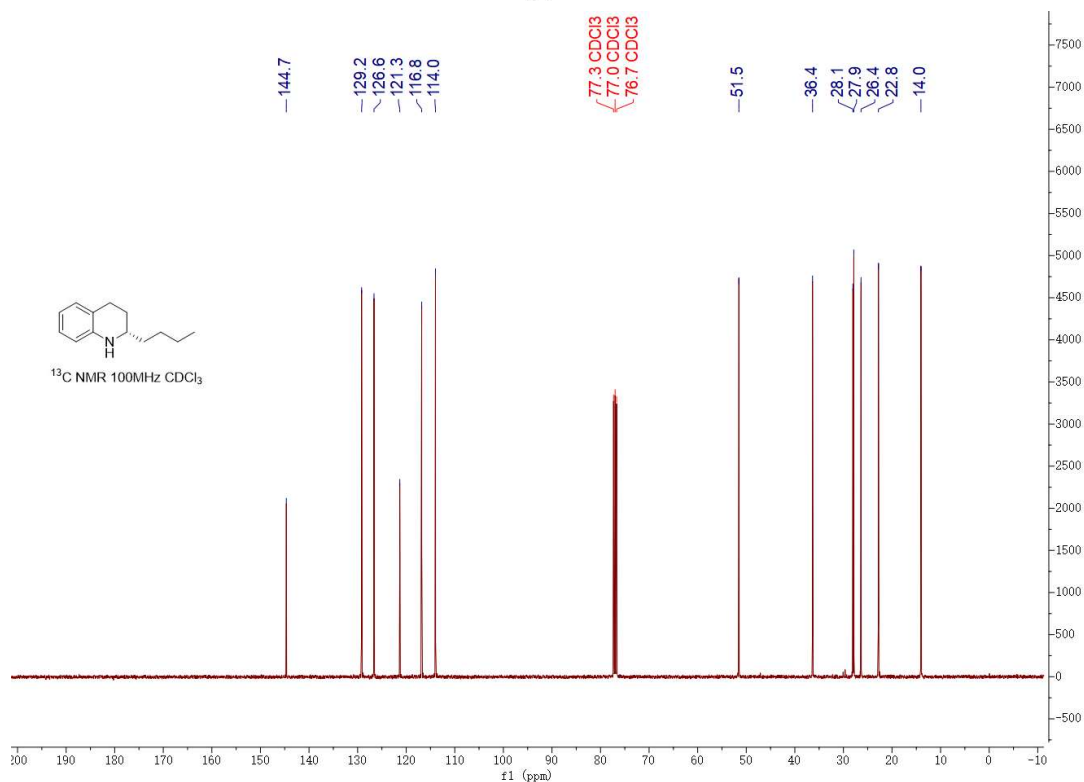

**(S)-2-pentyl-1,2,3,4-tetrahydroquinoline (2q):**

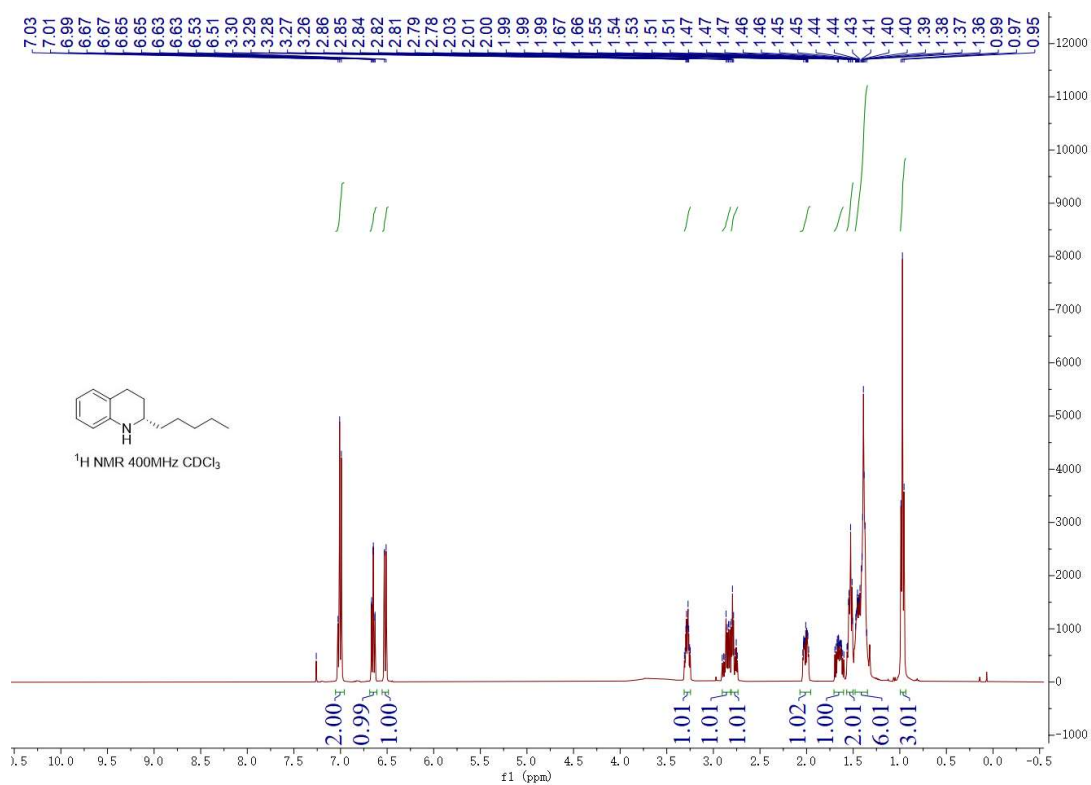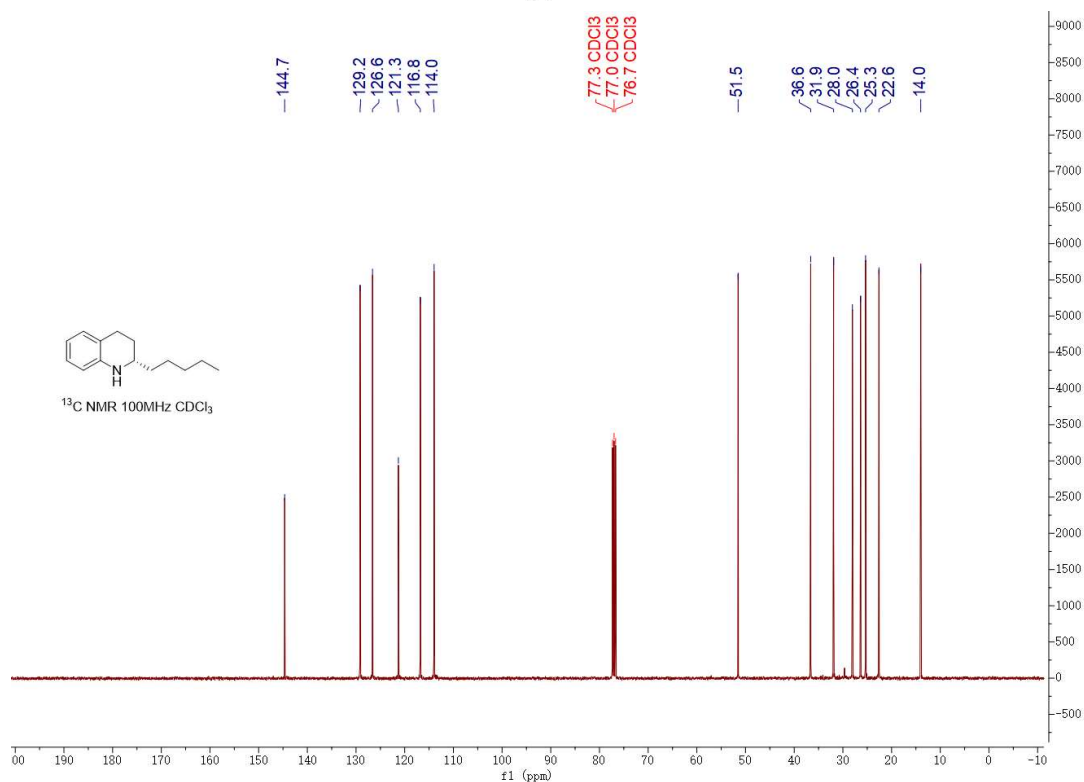



**(R)-2-isobutyl-1,2,3,4-tetrahydroquinoline (2r):**

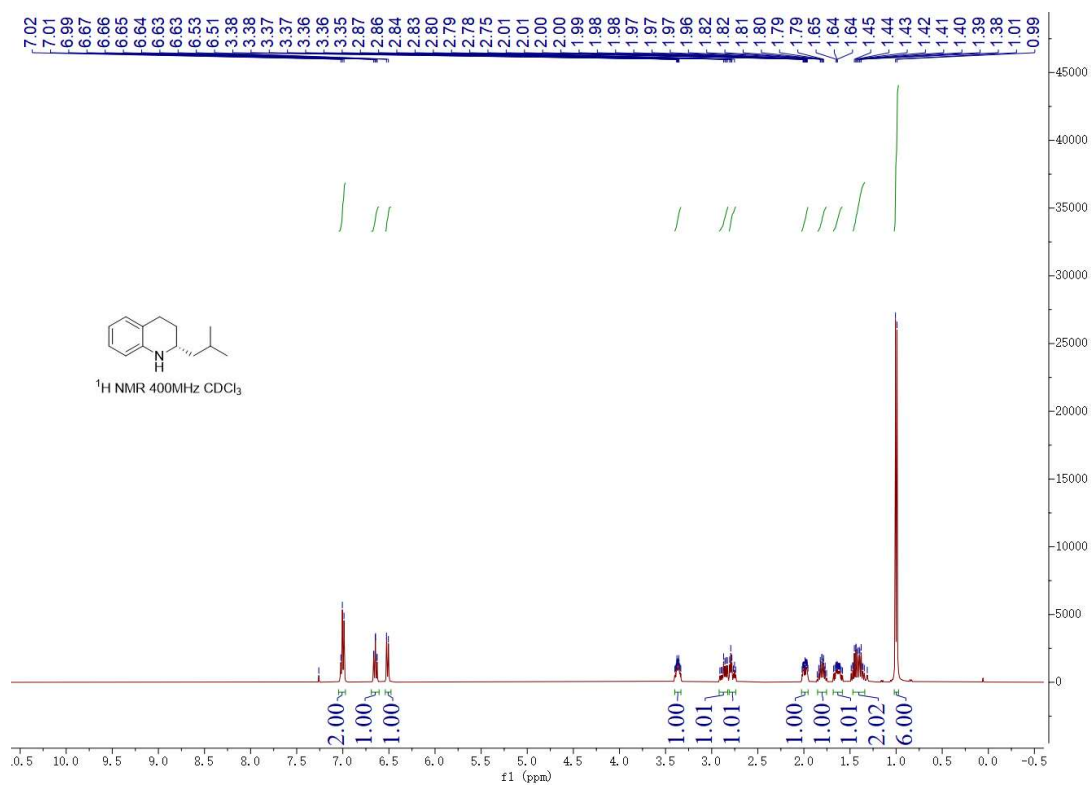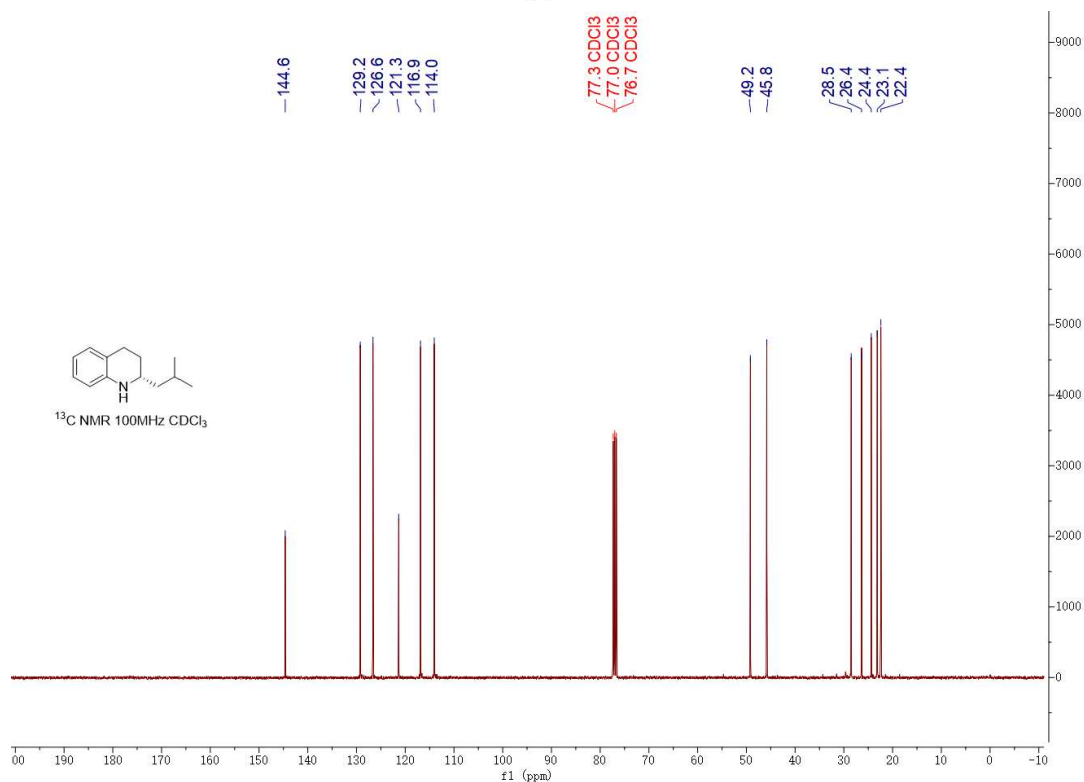

**(R)-2-(cyclohexylmethyl)-1,2,3,4-tetrahydroquinoline (2s):**

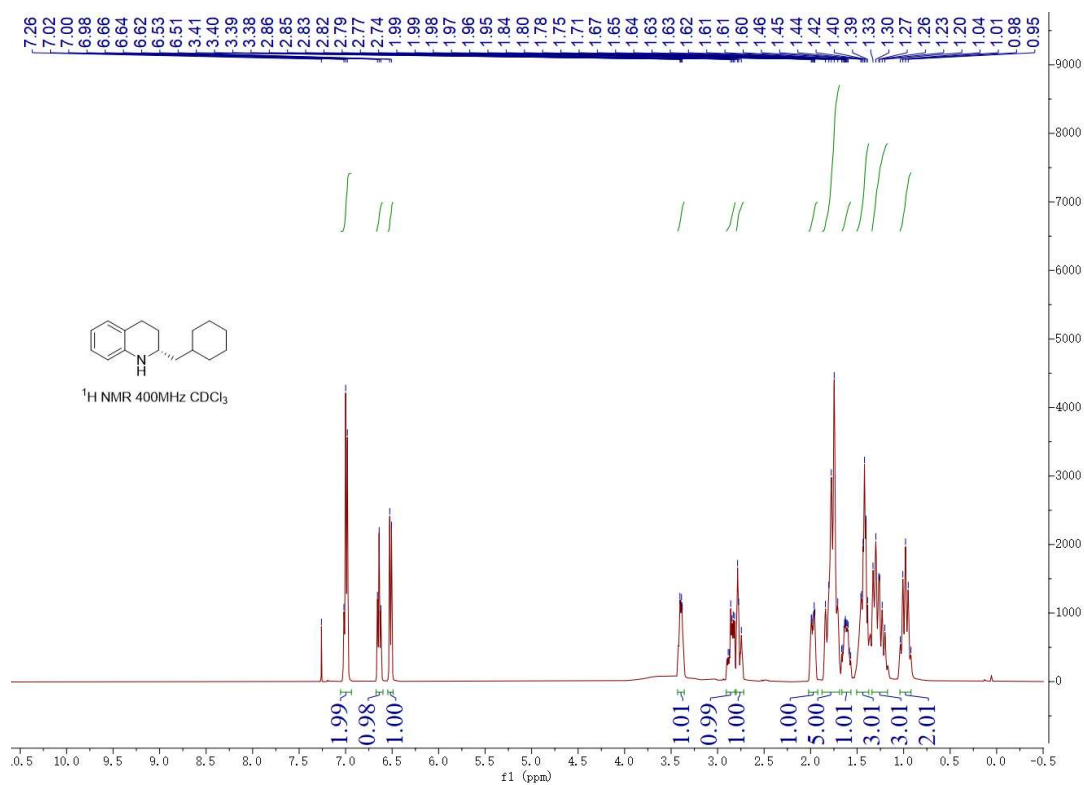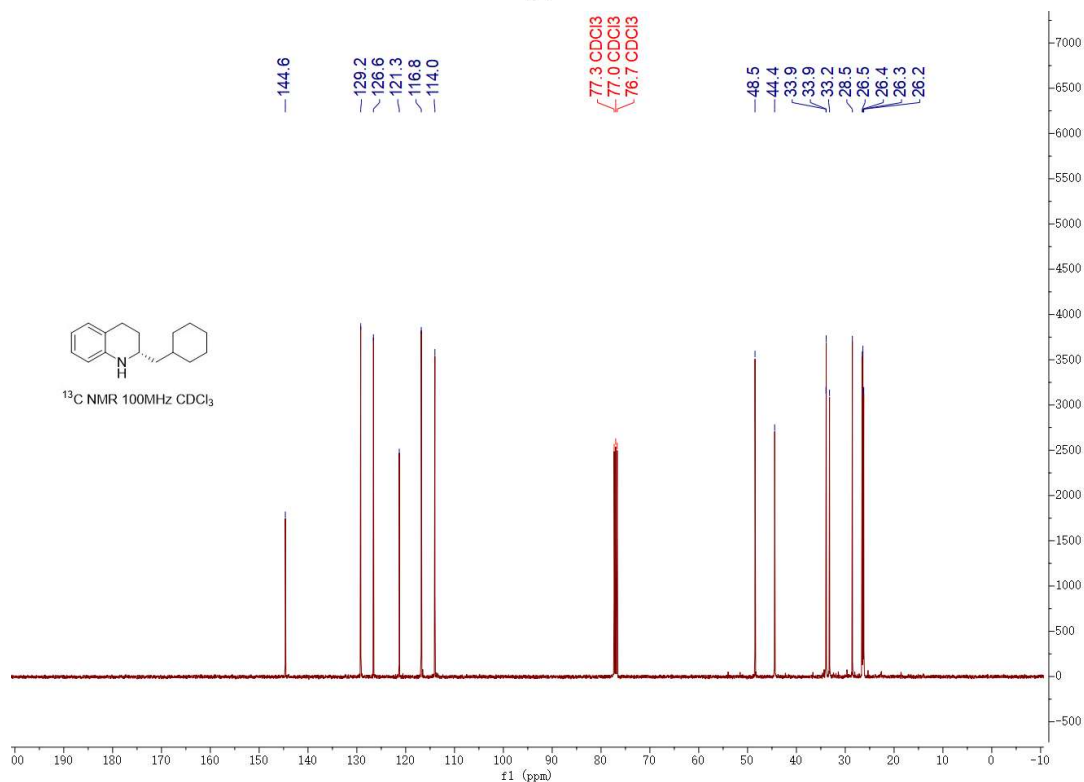

**(S)-2-(2-cyclohexylethyl)-1,2,3,4-tetrahydroquinoline (2t):**

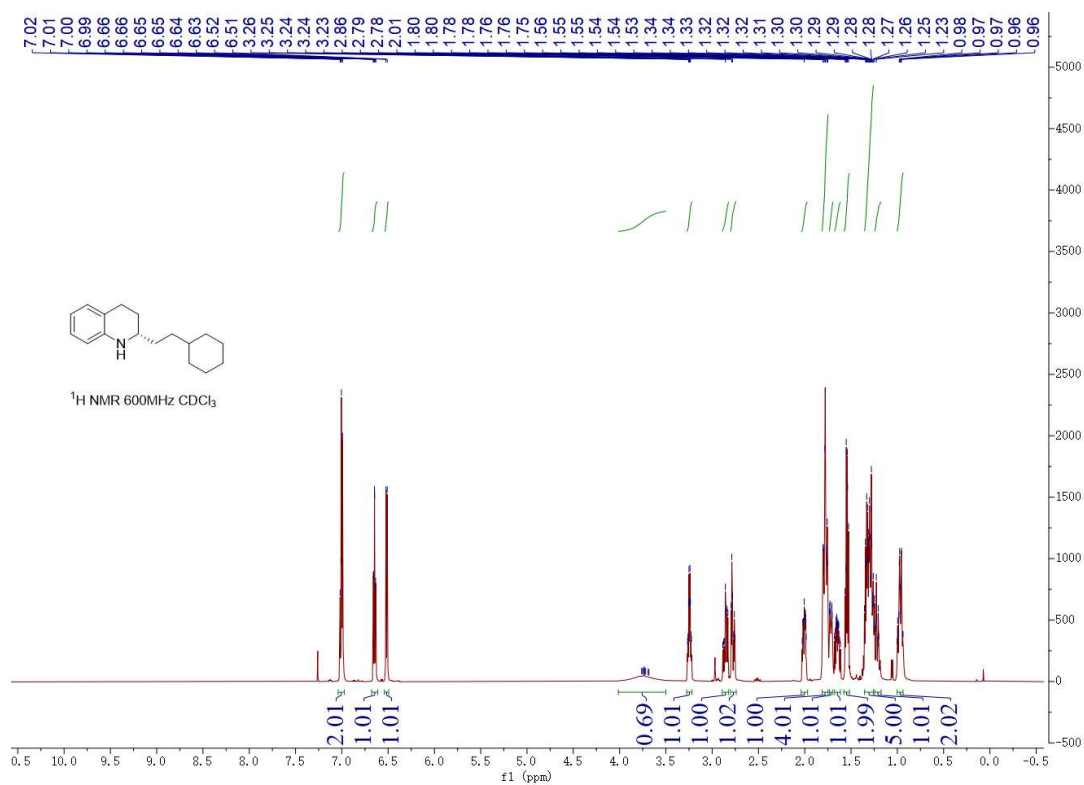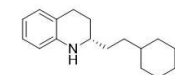

<sup>1</sup>H NMR 600MHz CDCl<sub>3</sub>

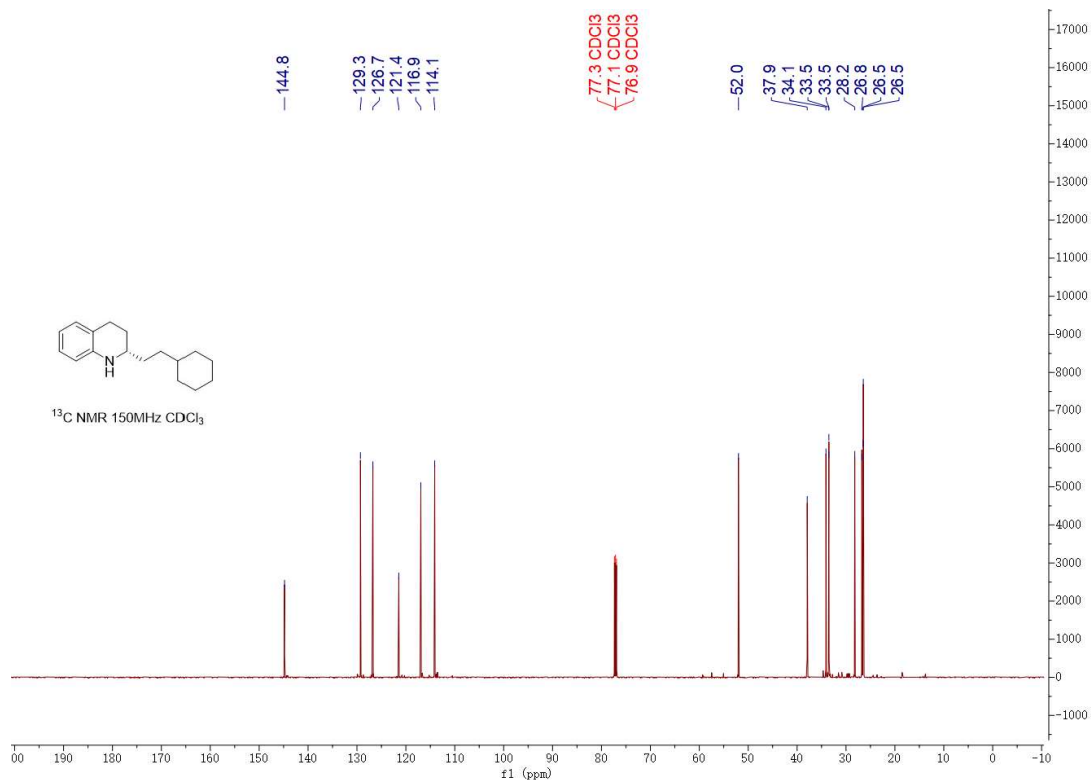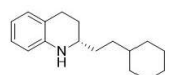

<sup>13</sup>C NMR 150MHz CDCl<sub>3</sub>

**(S)-2-(4-methoxyphenethyl)-1,2,3,4-tetrahydroquinoline (2u):**

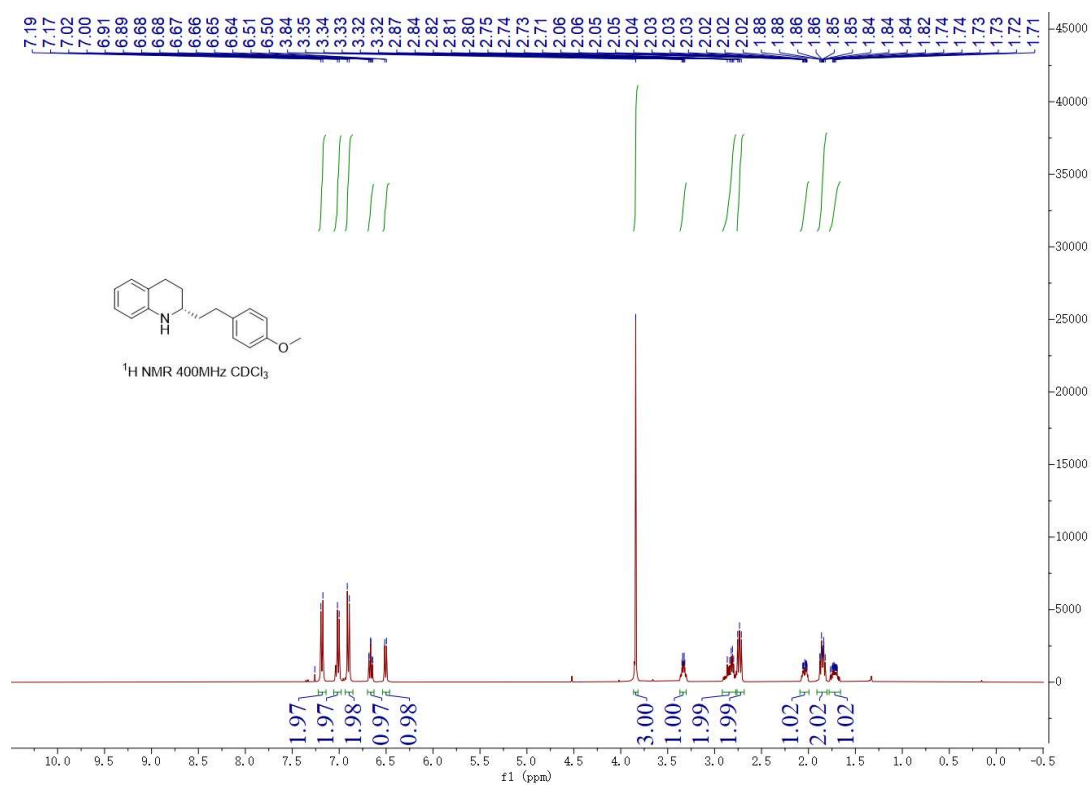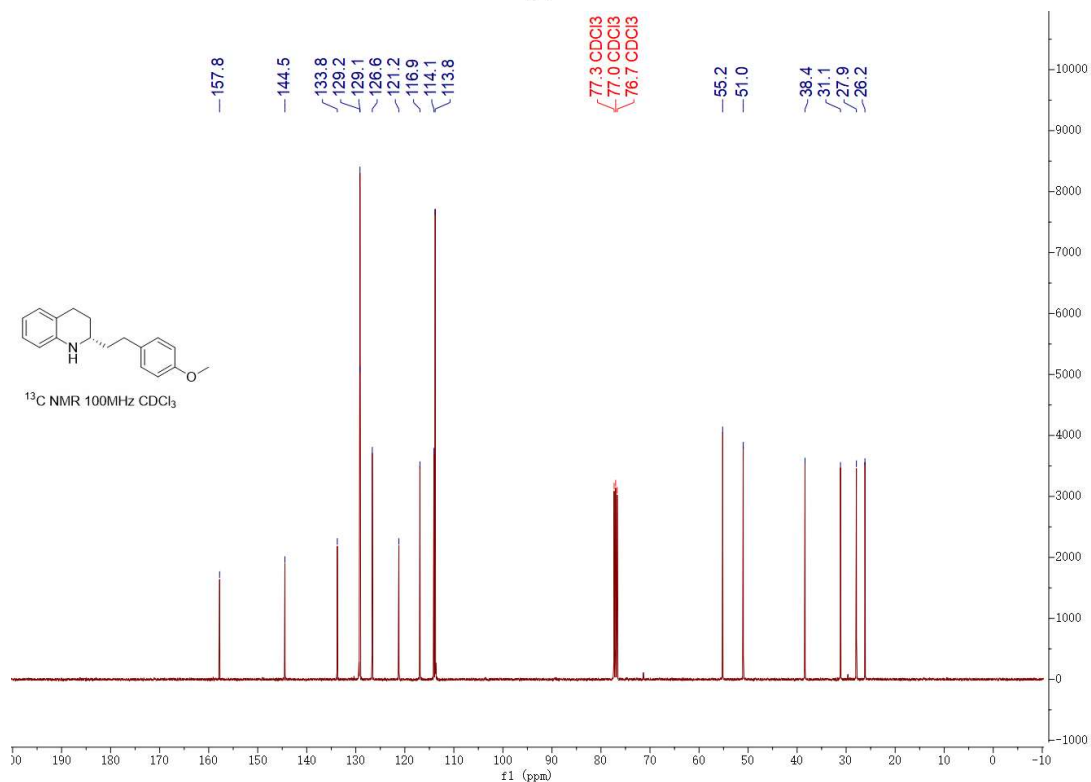

**(S)-2-phenethyl-1,2,3,4-tetrahydroquinoline (2v):**

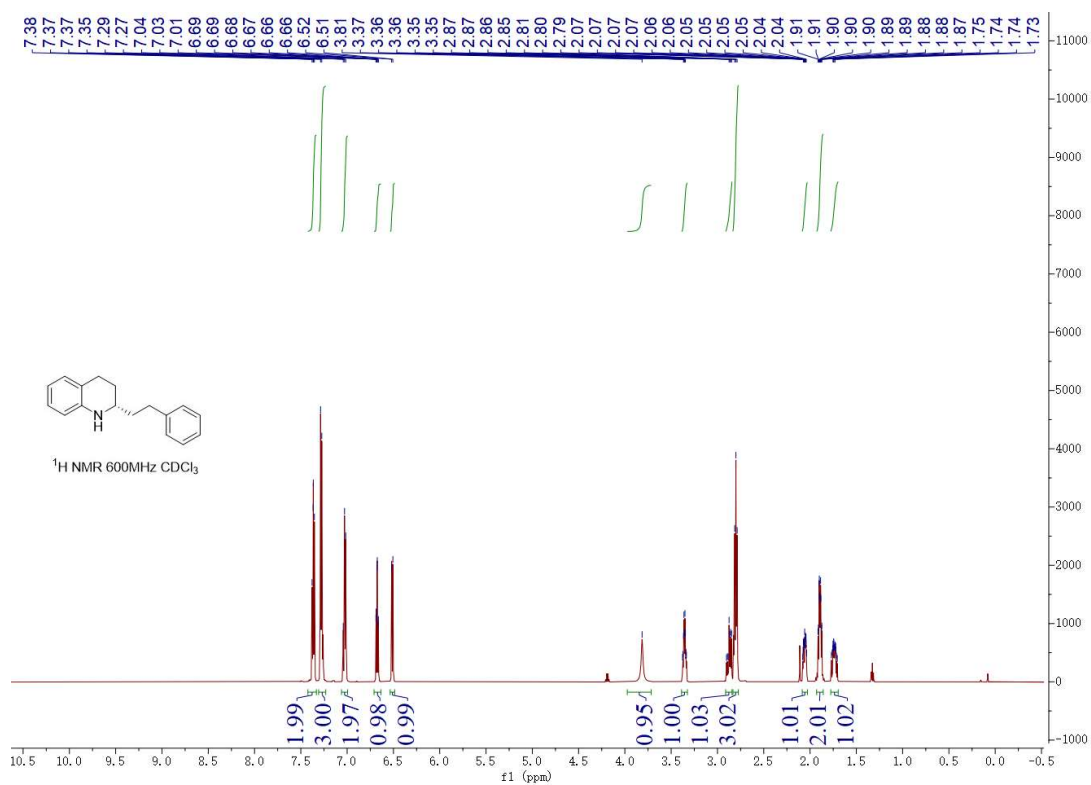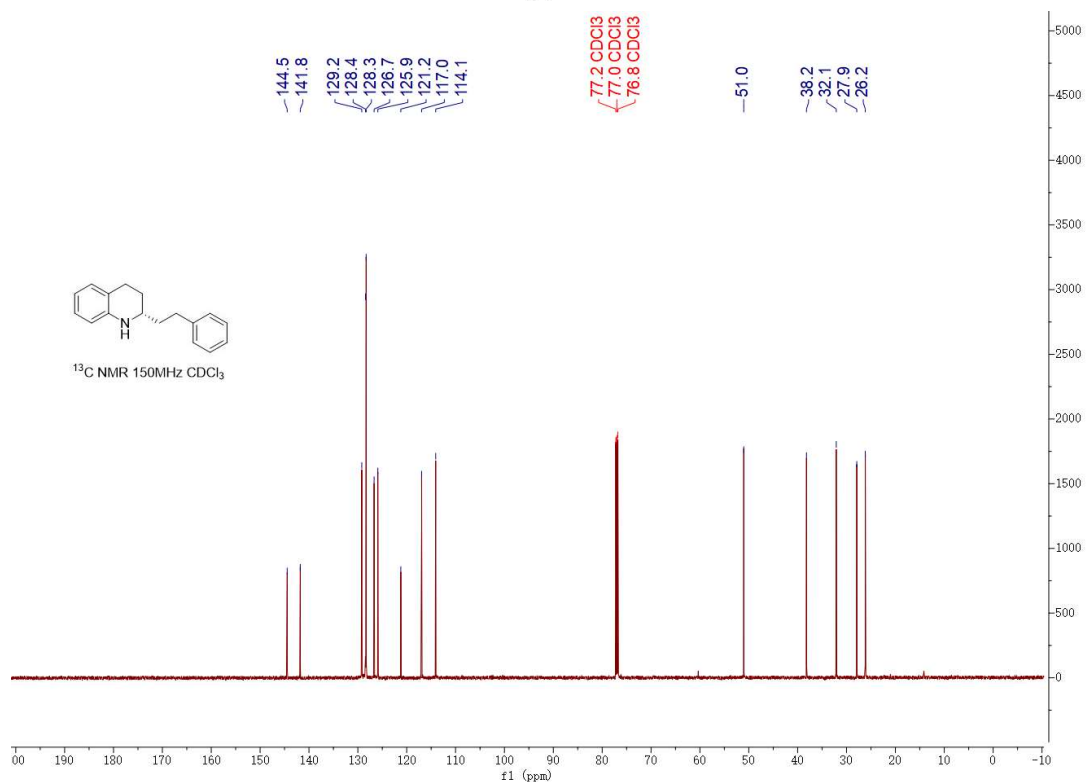

**(S)-2-(4-methylphenethyl)-1,2,3,4-tetrahydroquinoline (2w):**

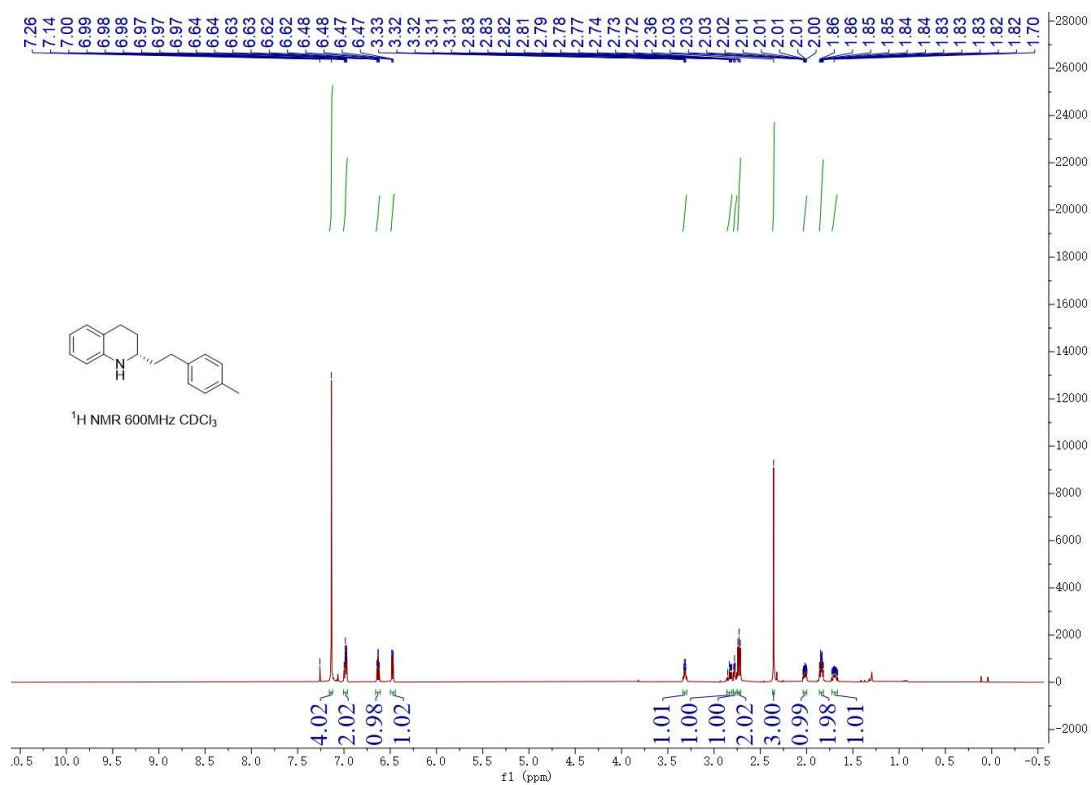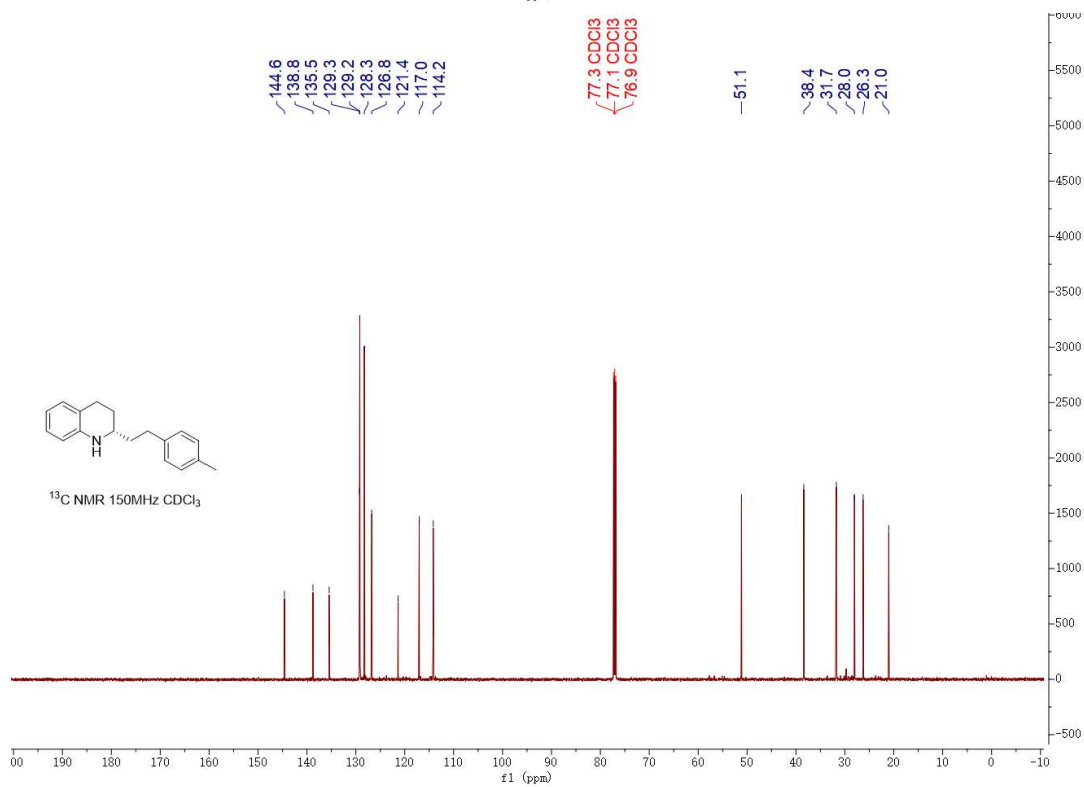

**(S)-2-(3-fluorophenethyl)-1,2,3,4-tetrahydroquinoline (2x):**

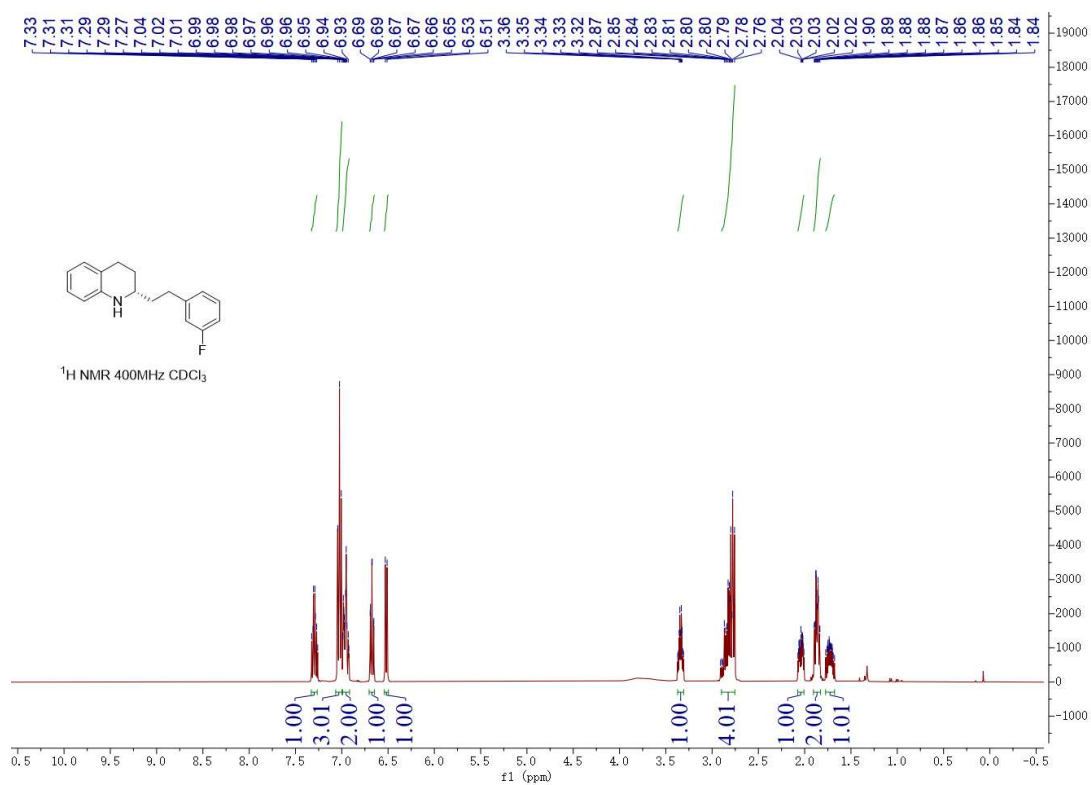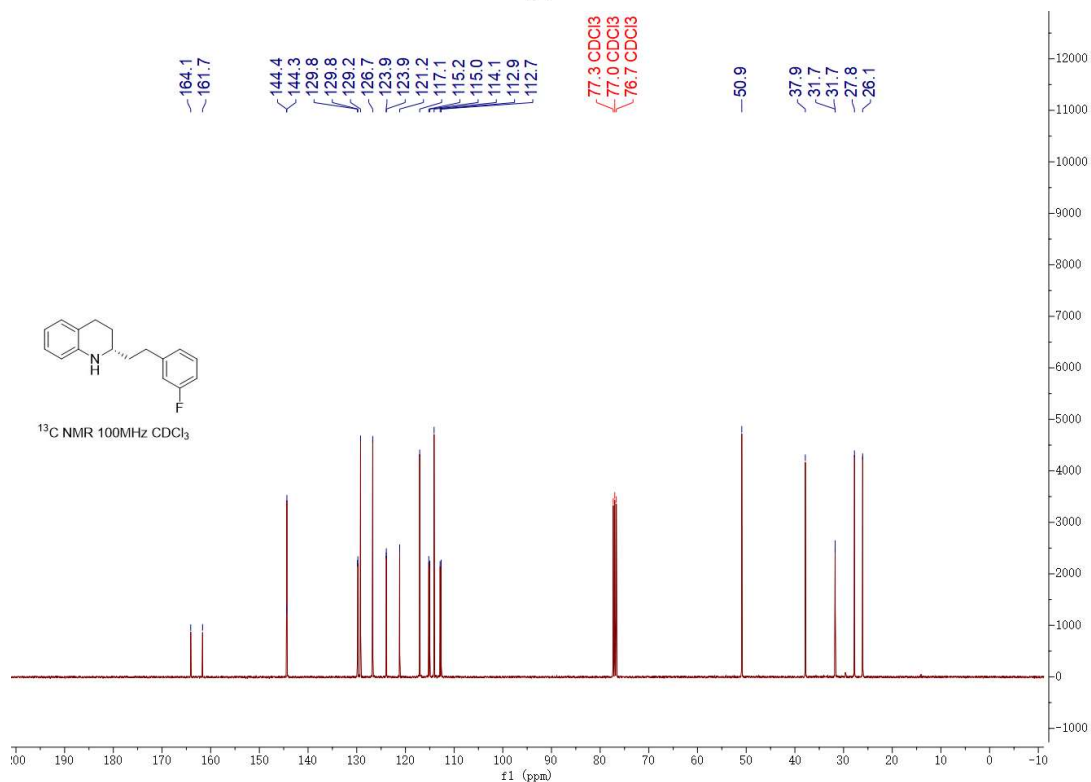

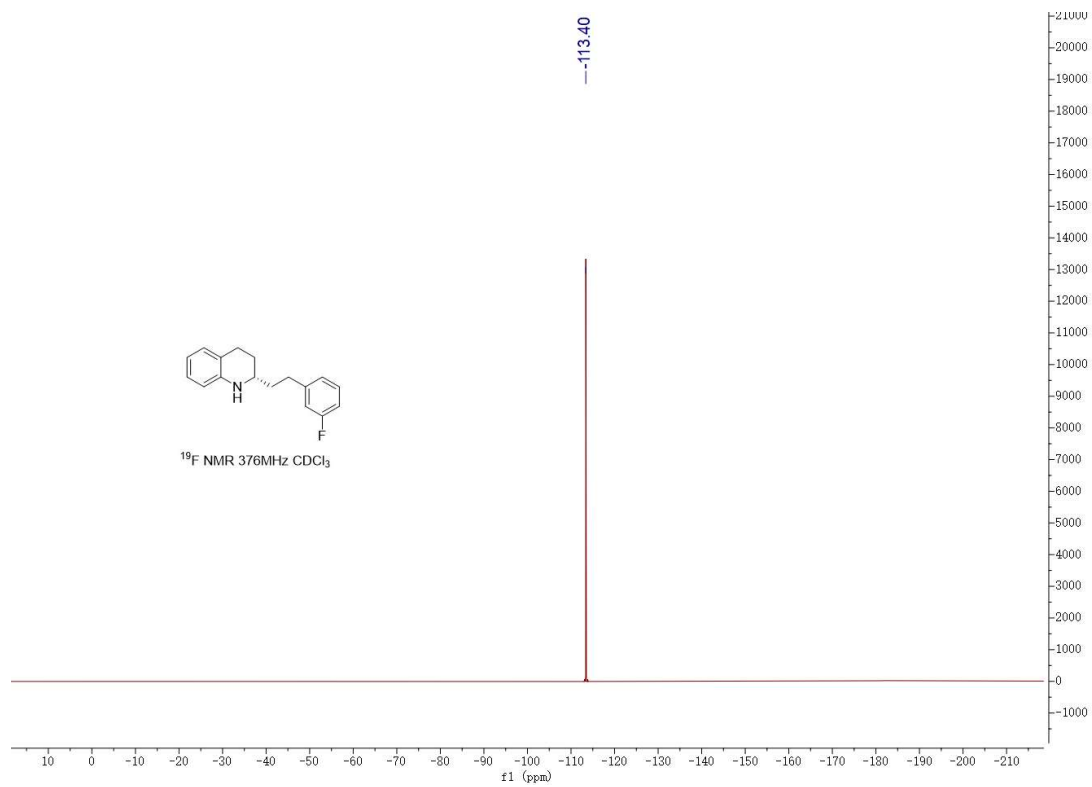



**(S)-2-(3-chlorophenethyl)-1,2,3,4-tetrahydroquinoline (2y):**

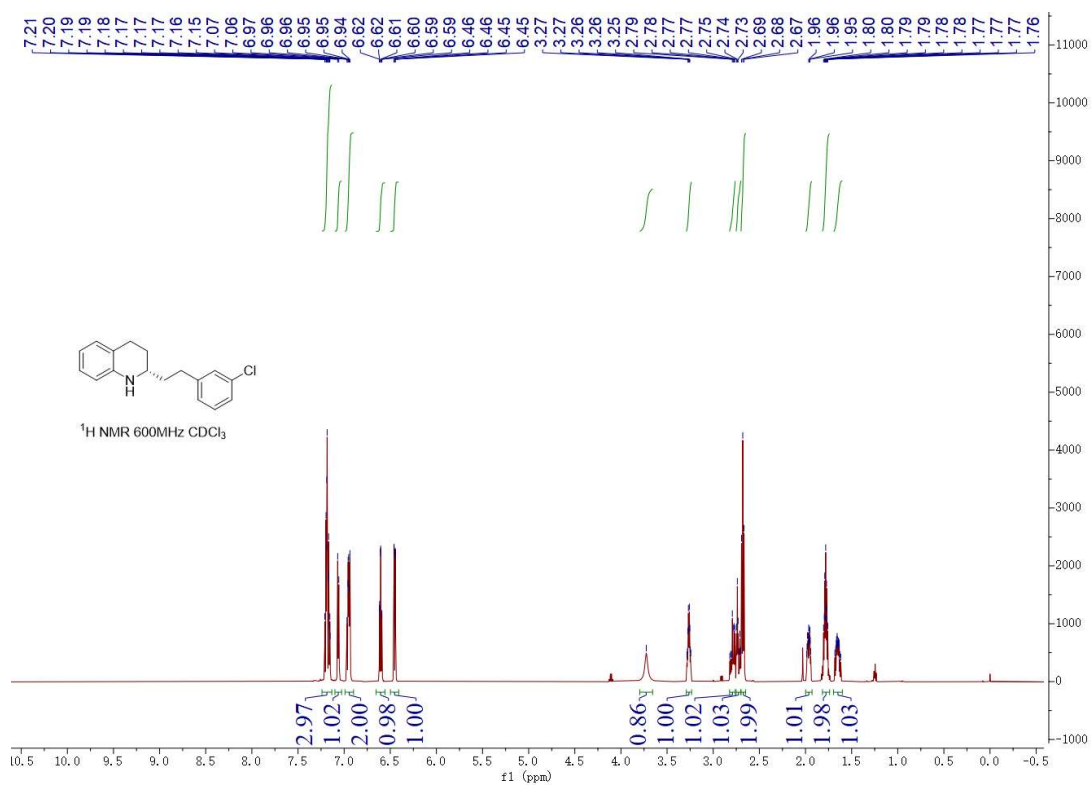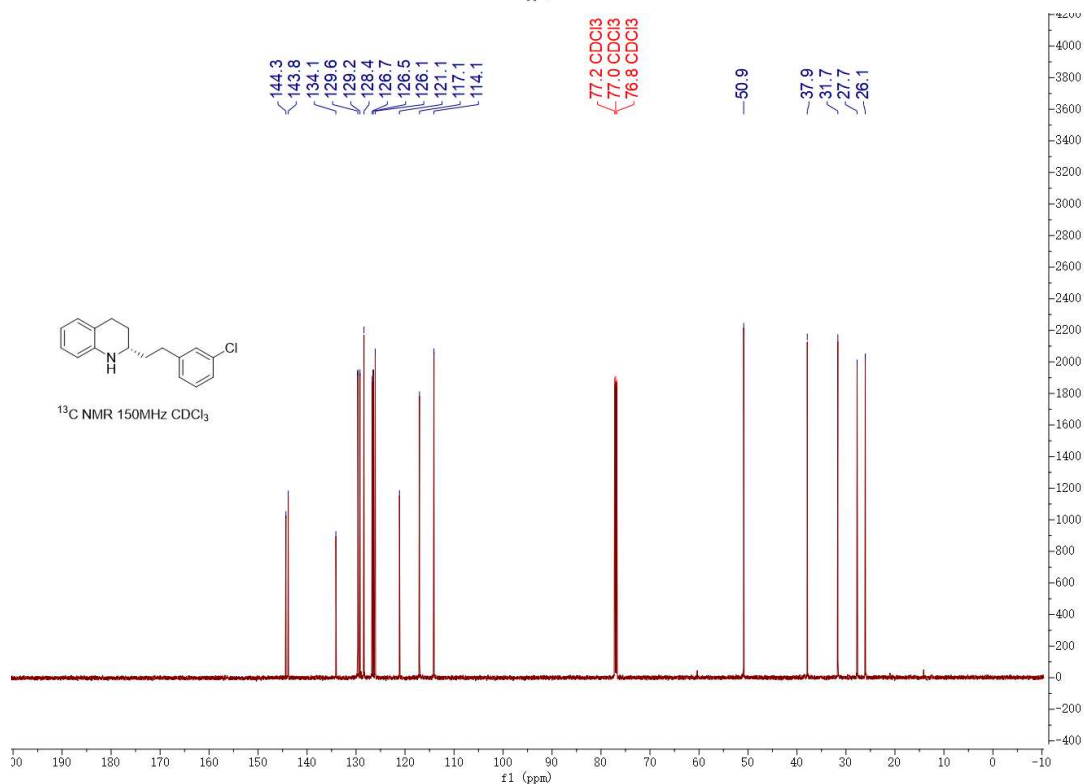

**(S)-2-(2-methylphenethyl)-1,2,3,4-tetrahydroquinoline (2z):**

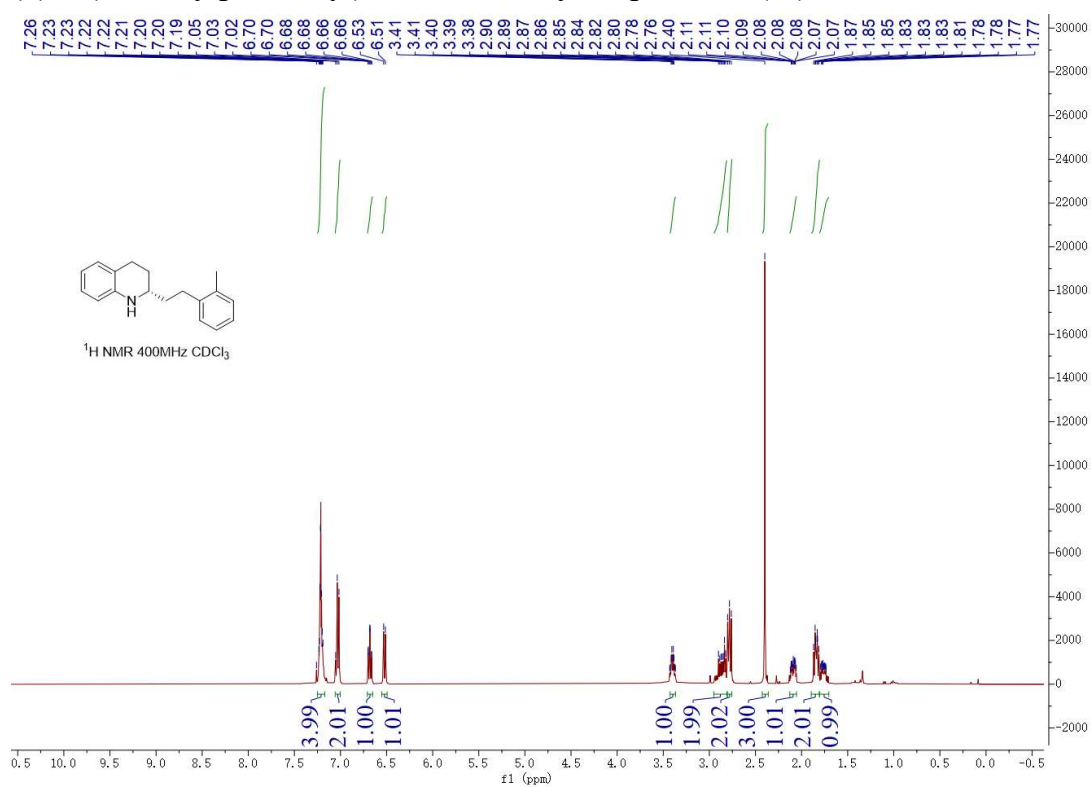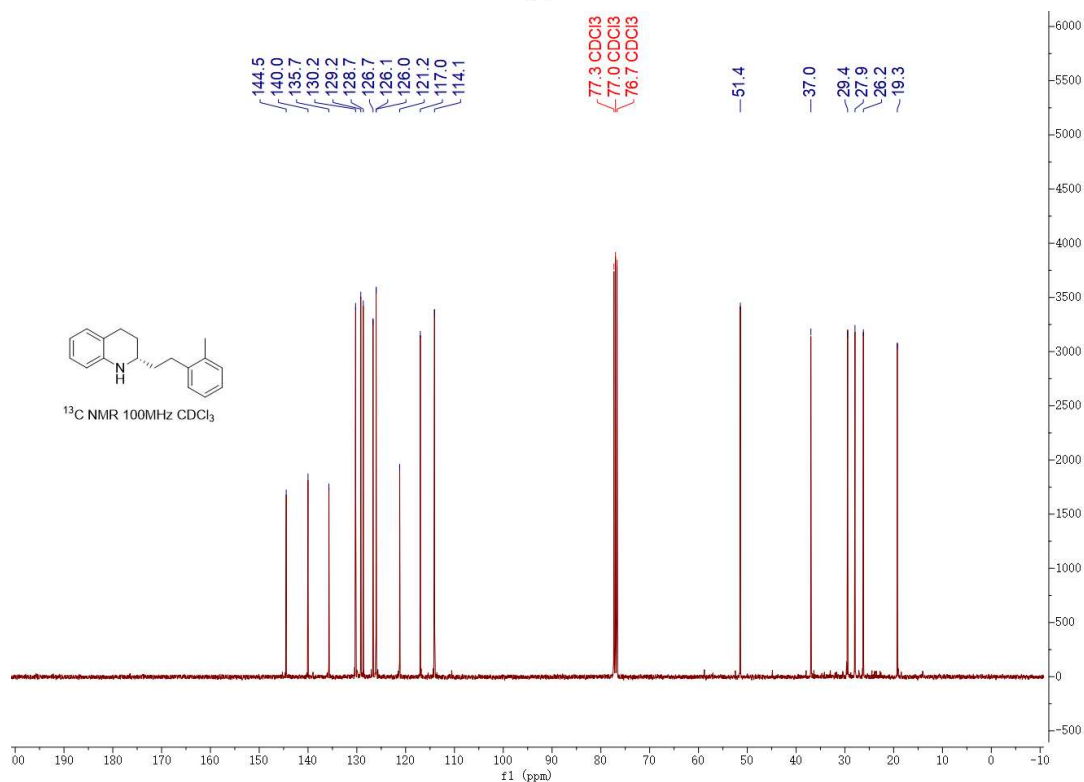

**(S)-2-(3,4-dimethoxyphenethyl)-1,2,3,4-tetrahydroquinoline (2aa):**

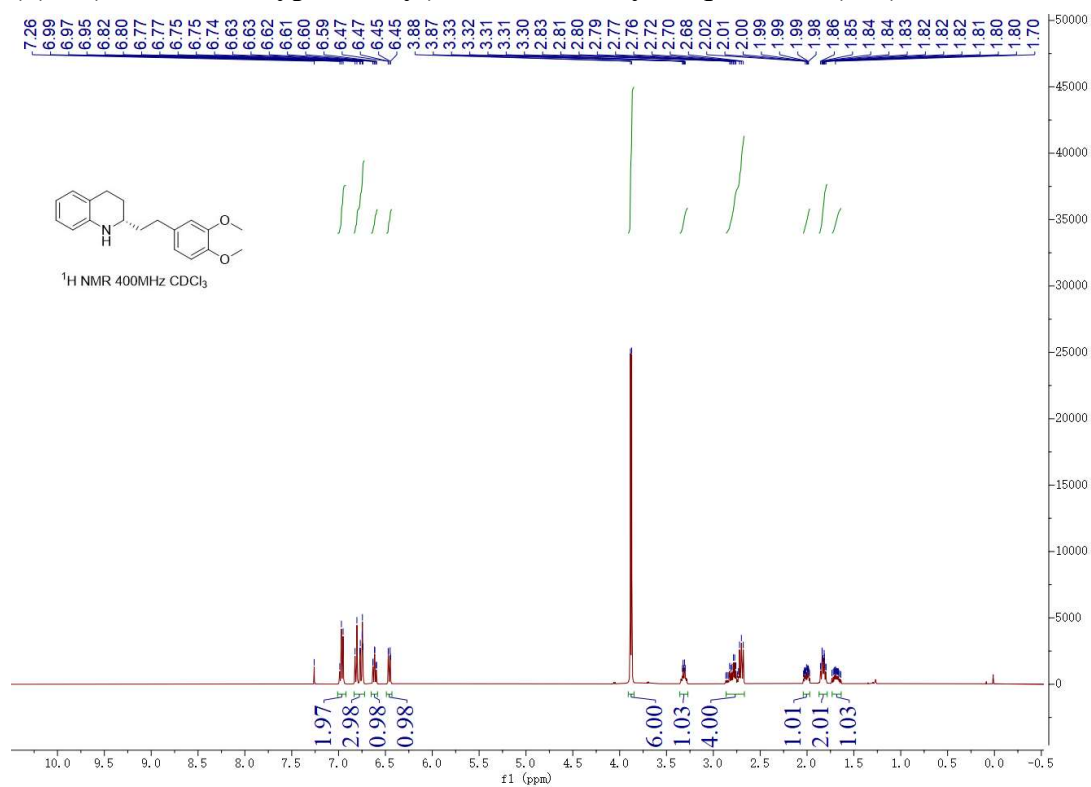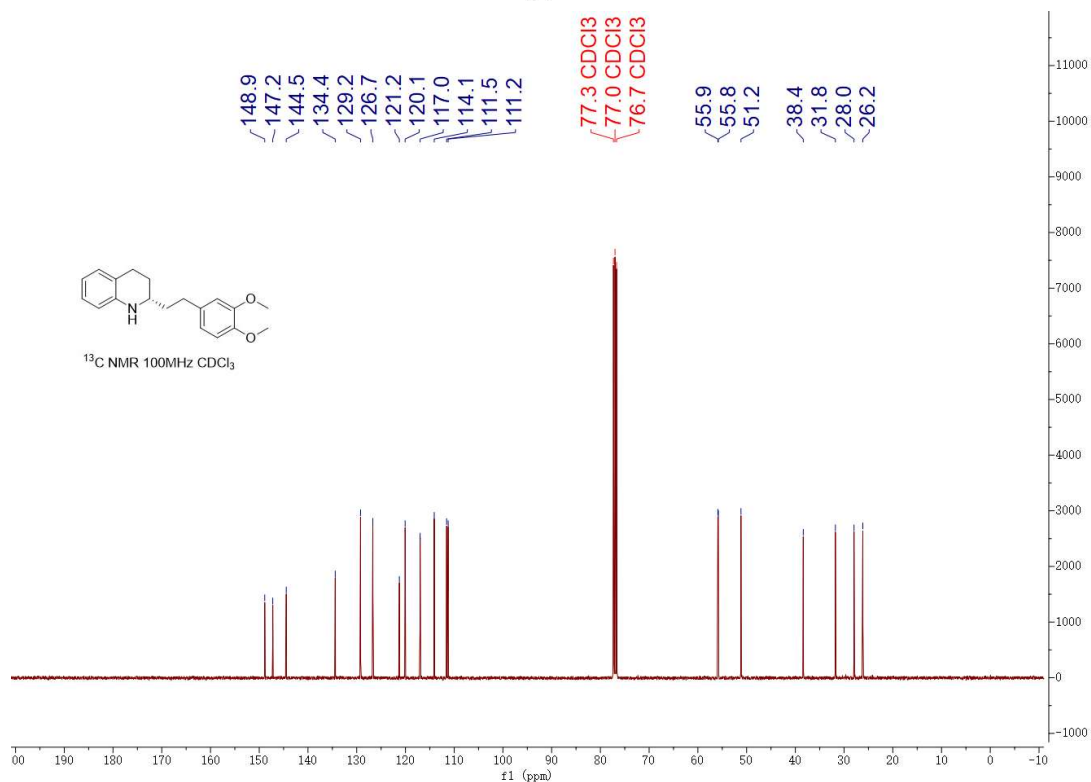

**(S)-2-(2-(naphthalen-2-yl)ethyl)-1,2,3,4-tetrahydroquinoline (2ab):**

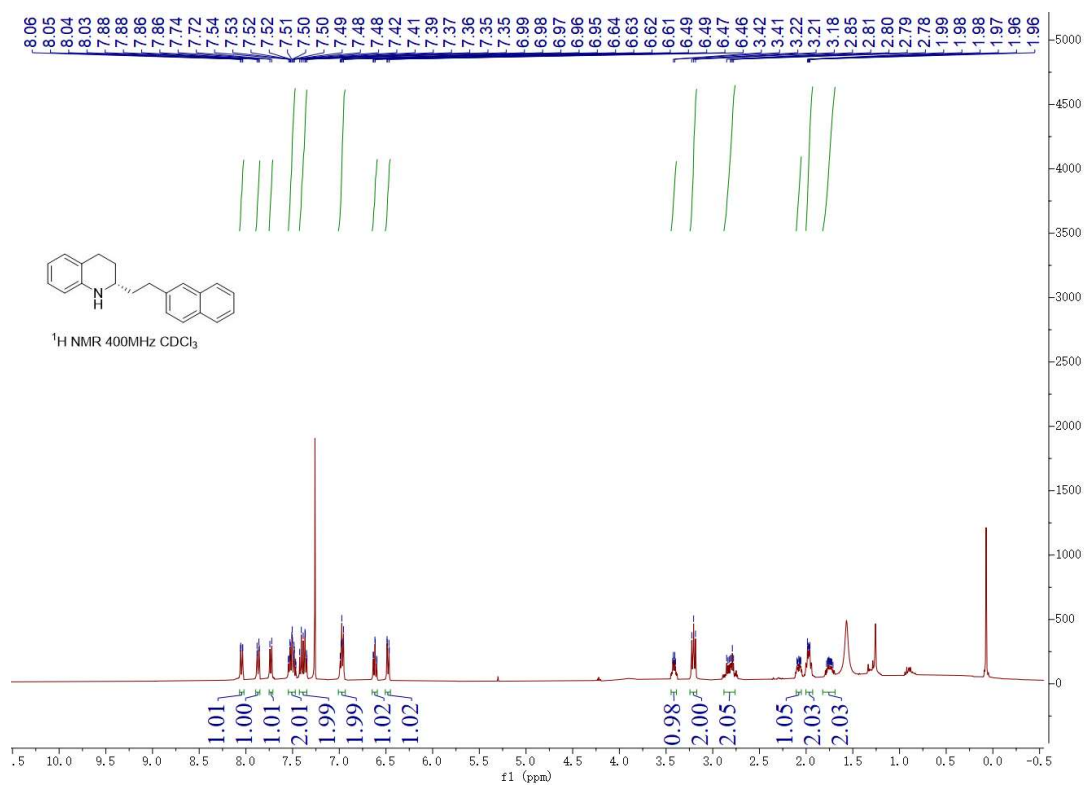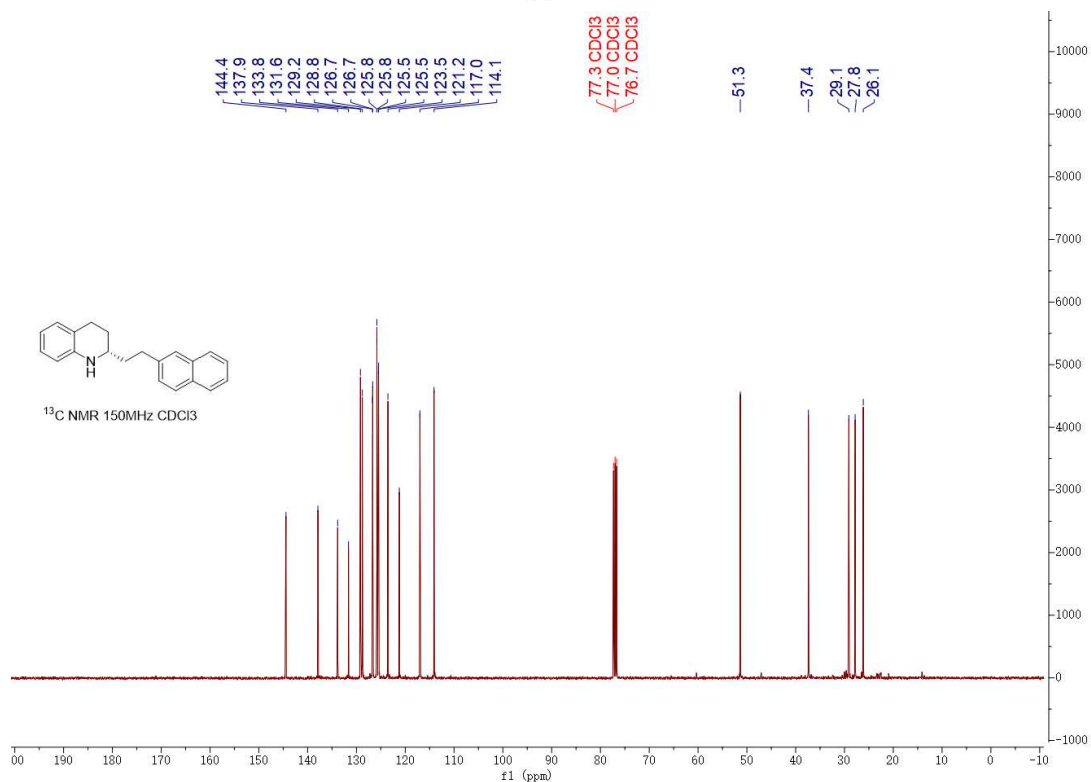

**(S)-2-(but-3-en-1-yl)-1,2,3,4-tetrahydroquinoline (2ac):**

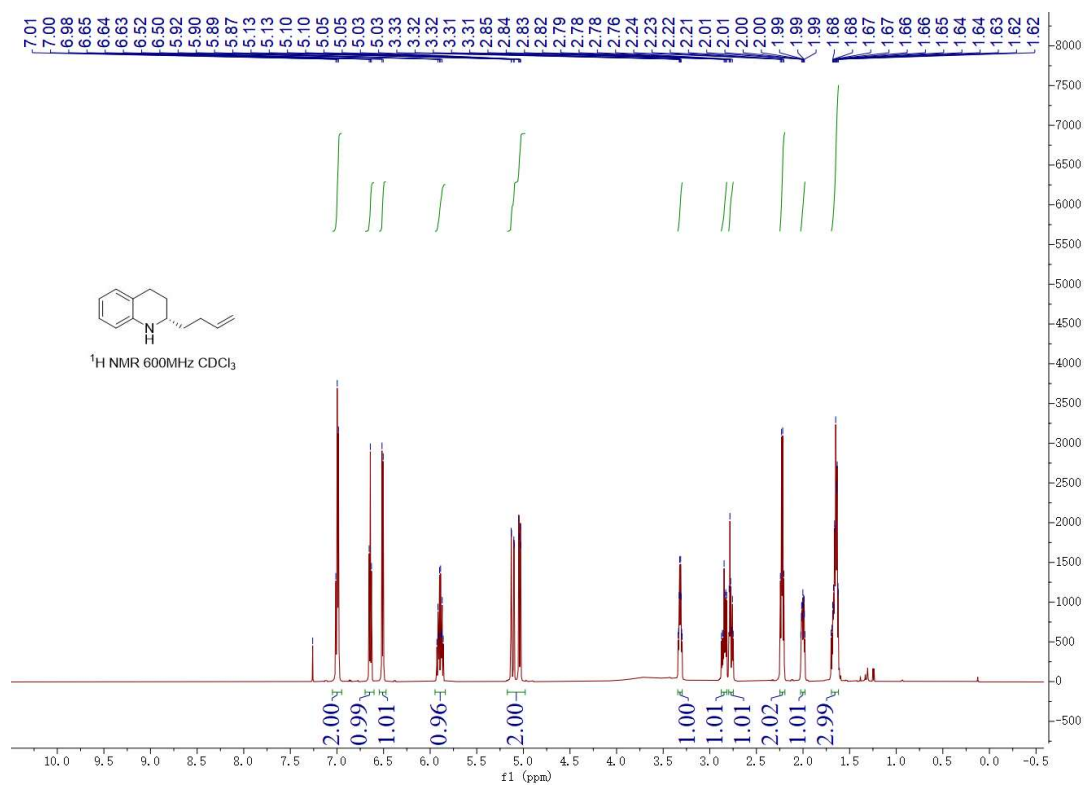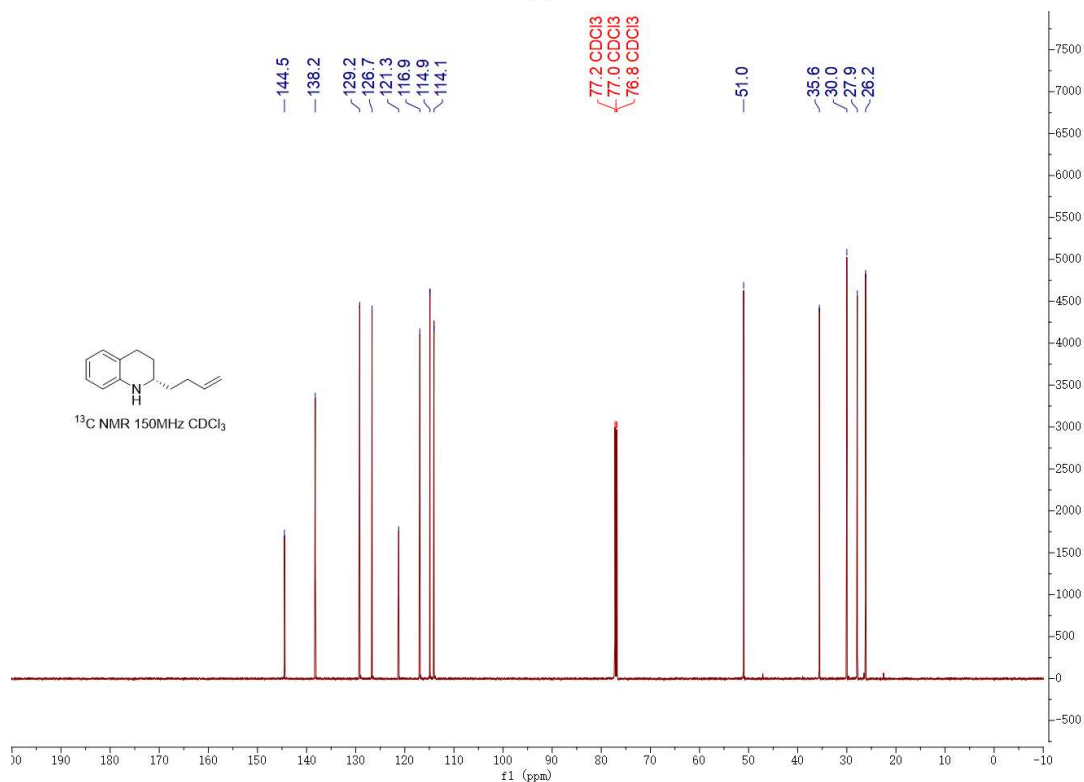

**(S,E)-2-(4-phenylbut-3-en-1-yl)-1,2,3,4-tetrahydroquinoline (2ad):**

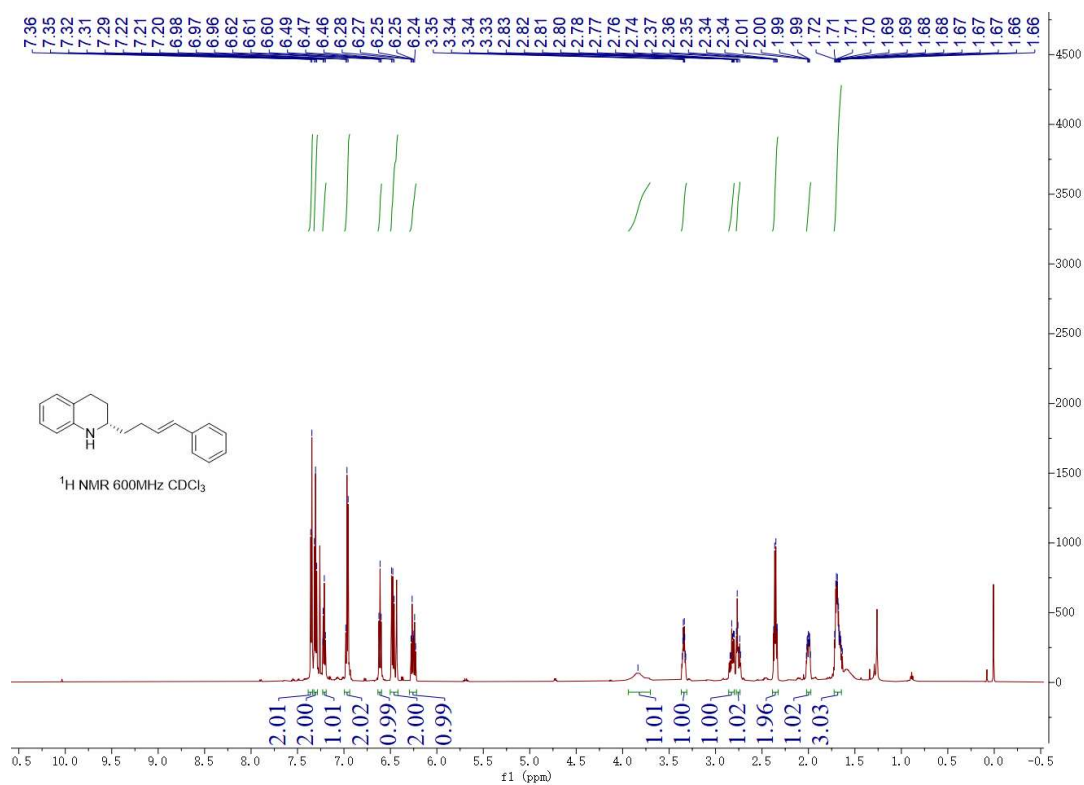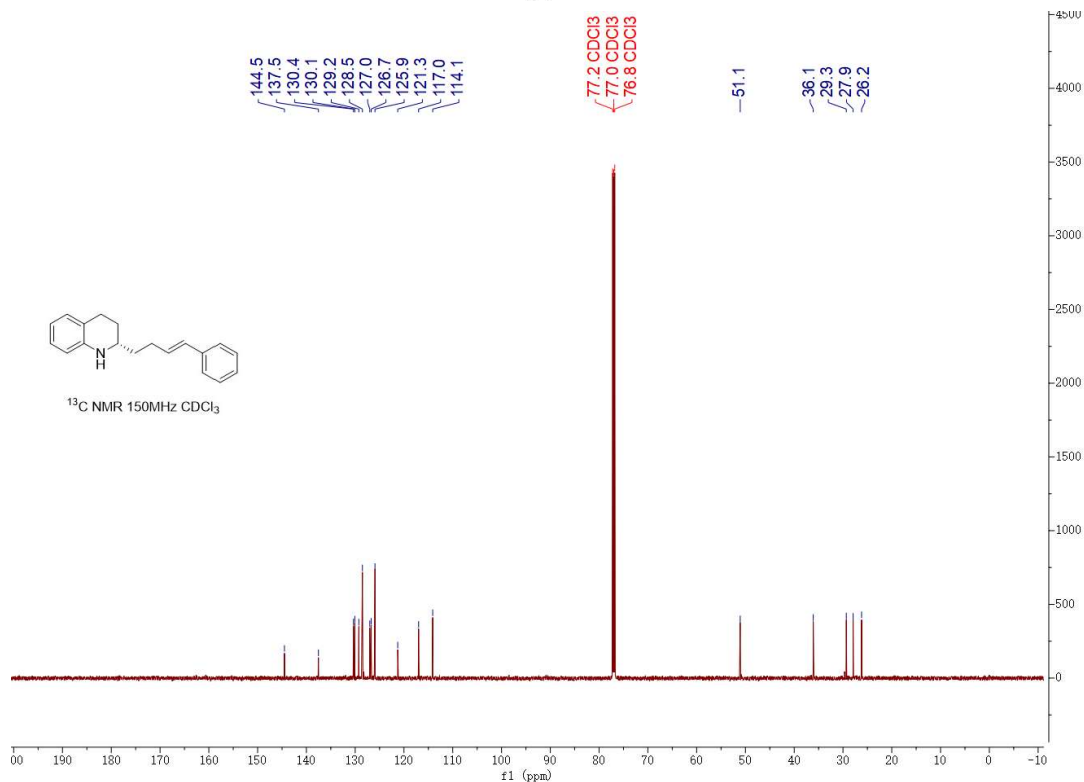

**(S)-2-(pent-4-yn-1-yl)-1,2,3,4-tetrahydroquinoline (2ae):**

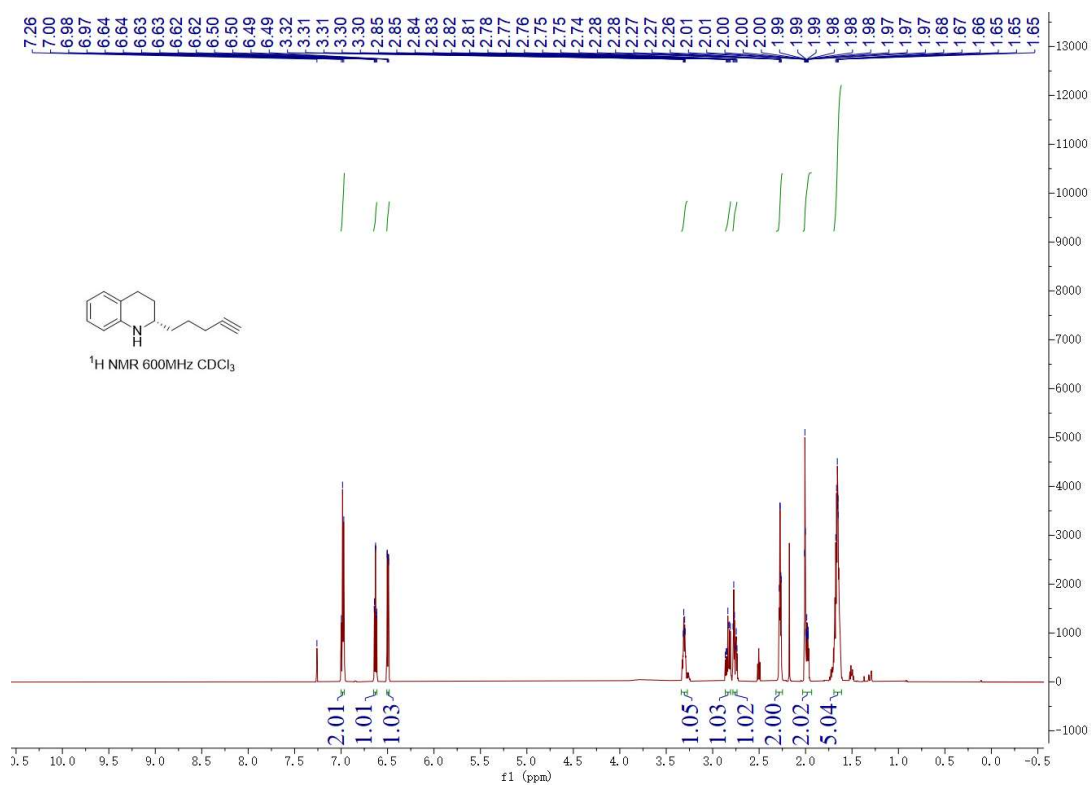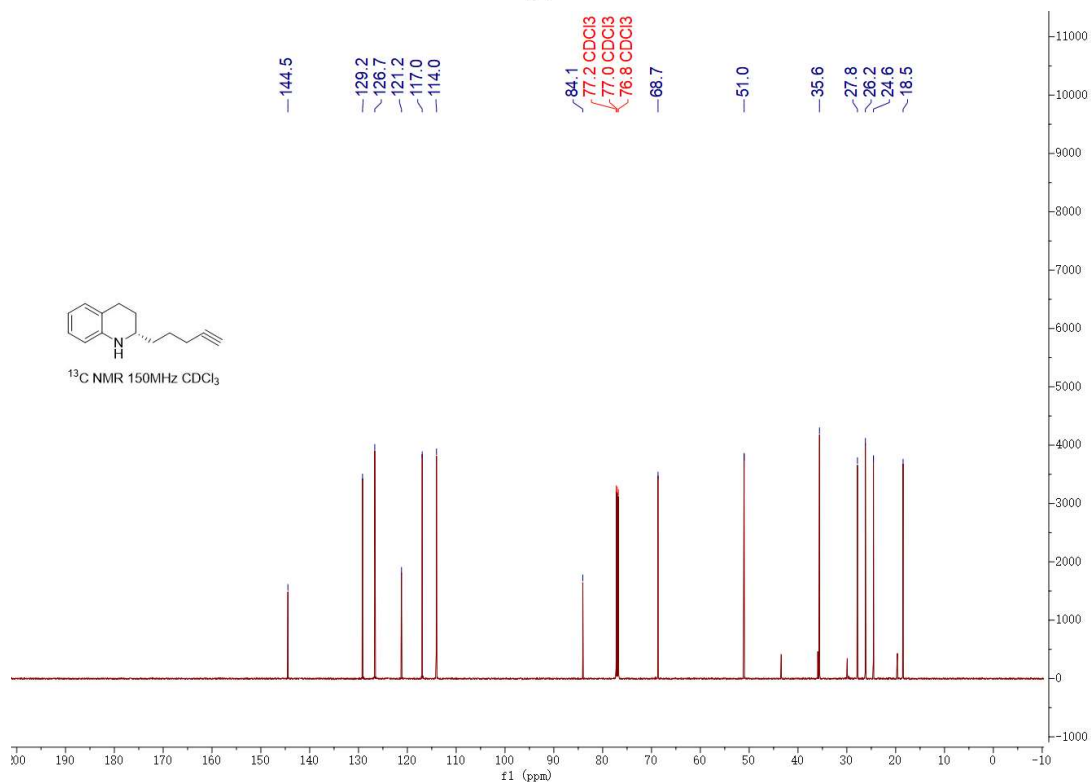

## 2,3-dimethyl-1,2,3,4-tetrahydro-quinoline (2af):

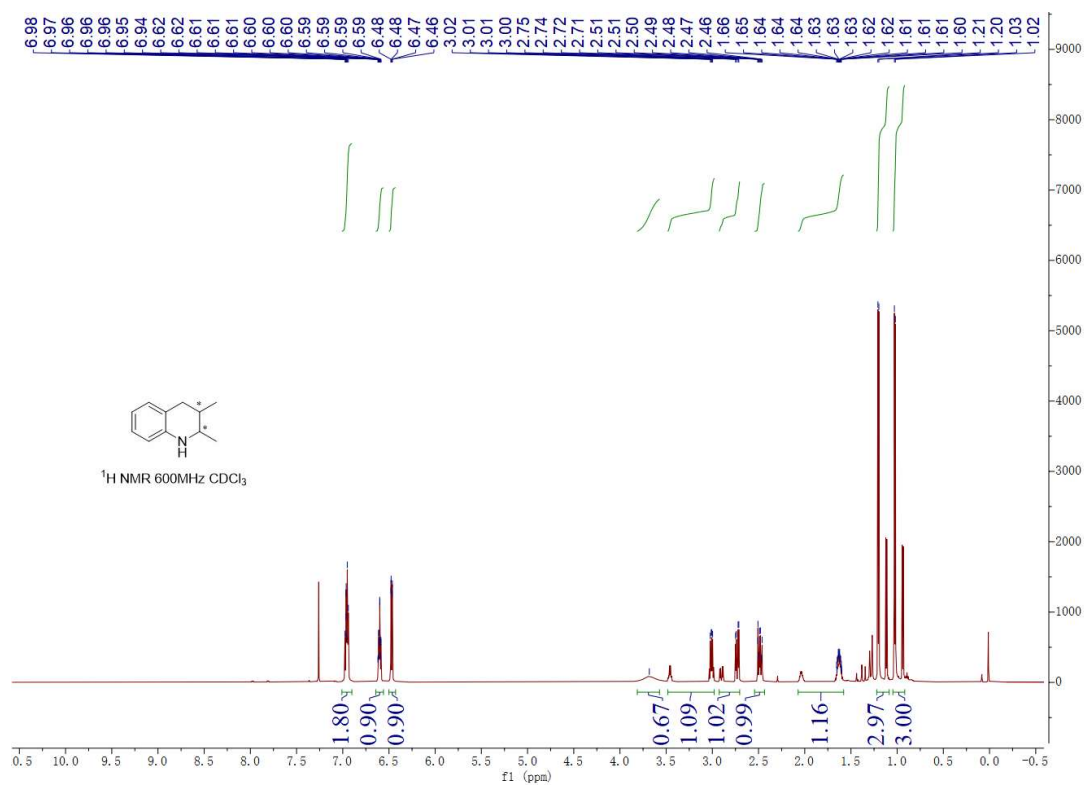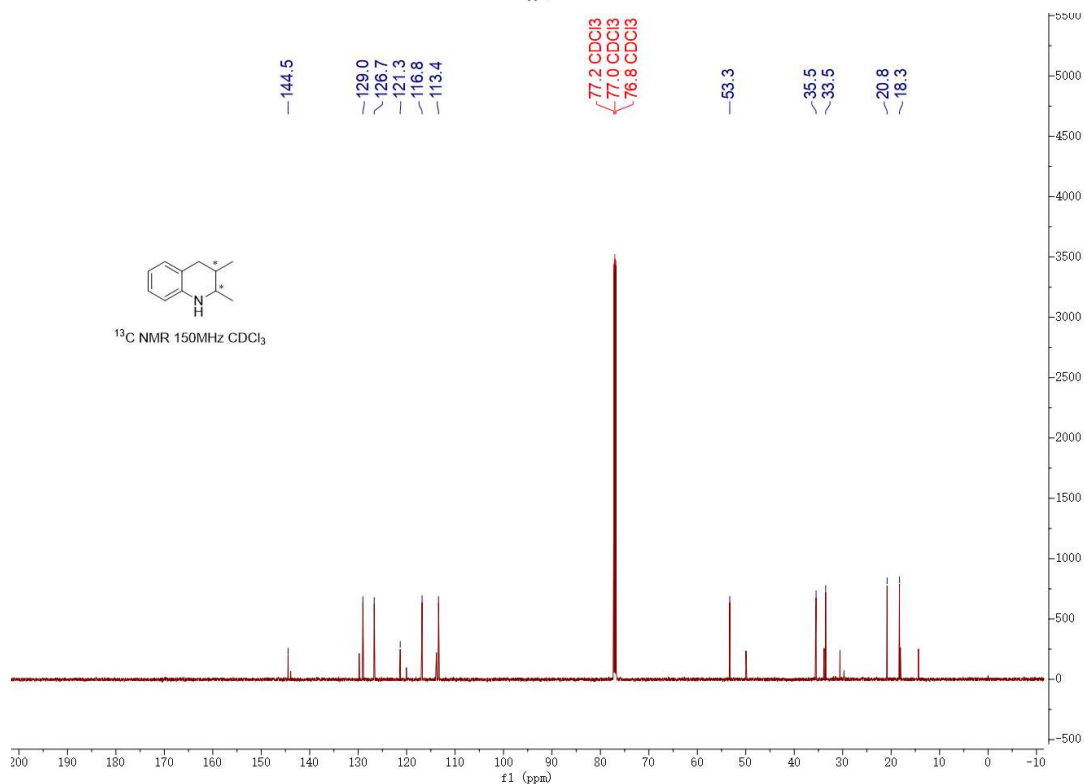



**(S)-2-(3,4-dimethoxyphenethyl)-1-methyl-1,2,3,4-tetrahydroquinoline (3aa):**

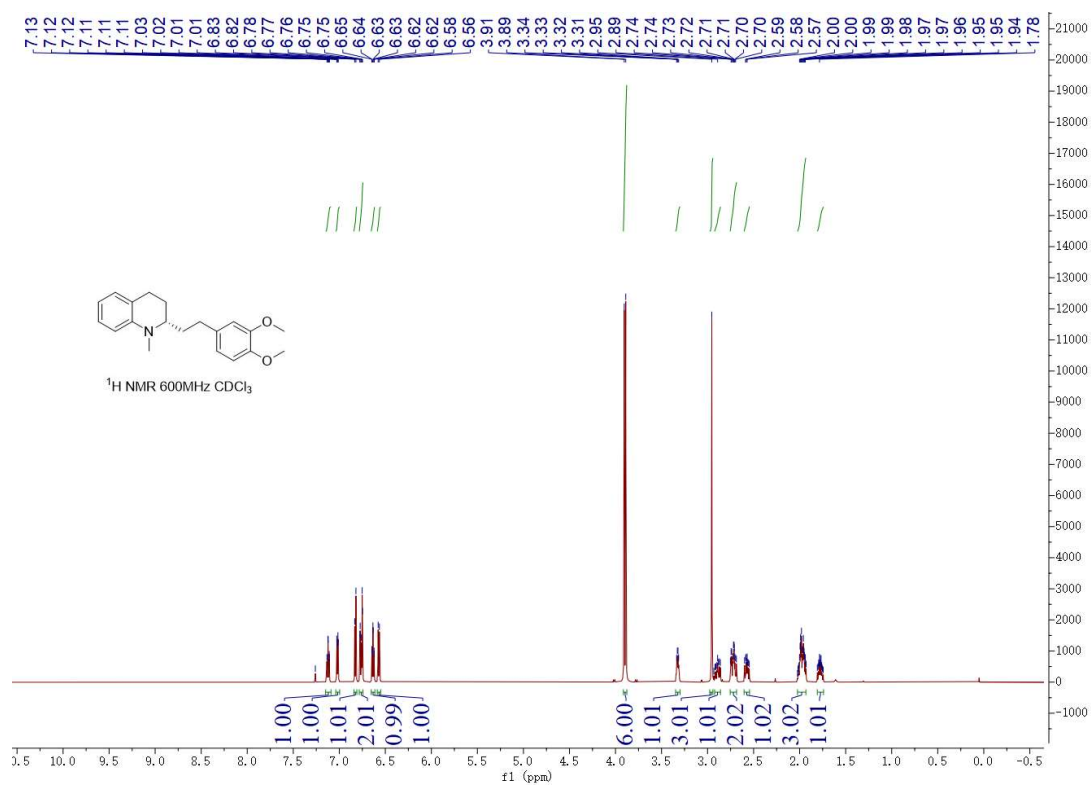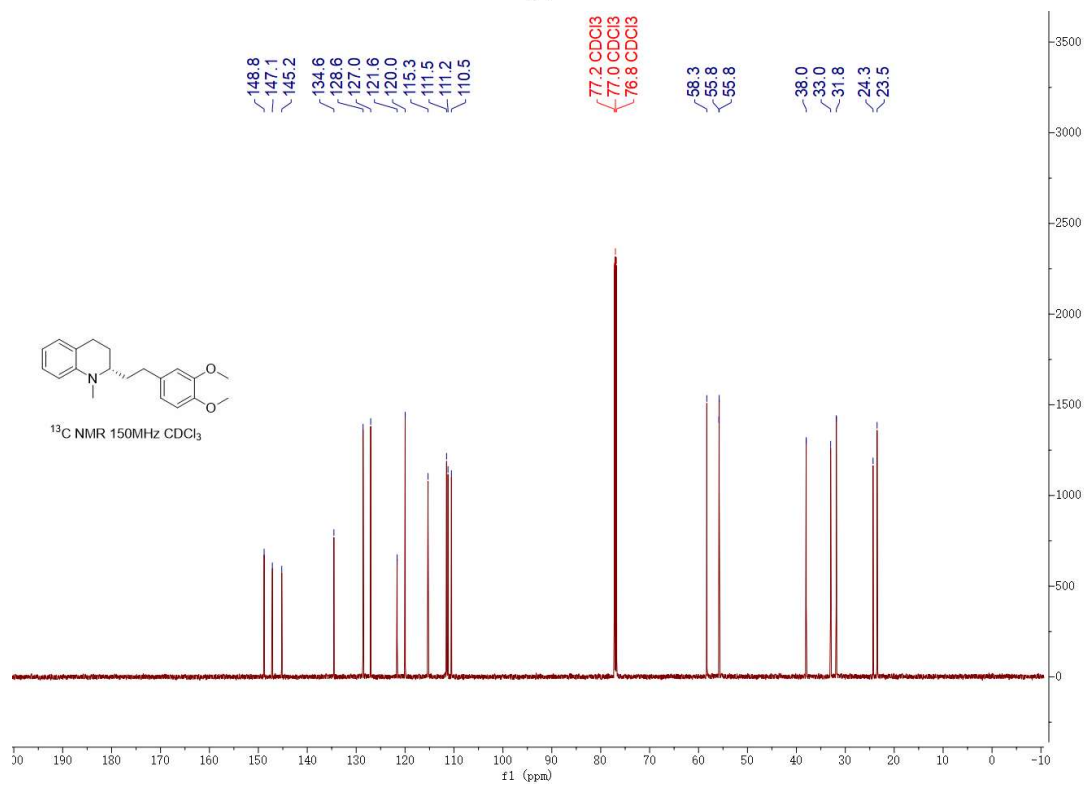

## 9. Copies of HPLC charts

### (S)-2-methyl-1,2,3,4-tetrahydroquinoline (2a):

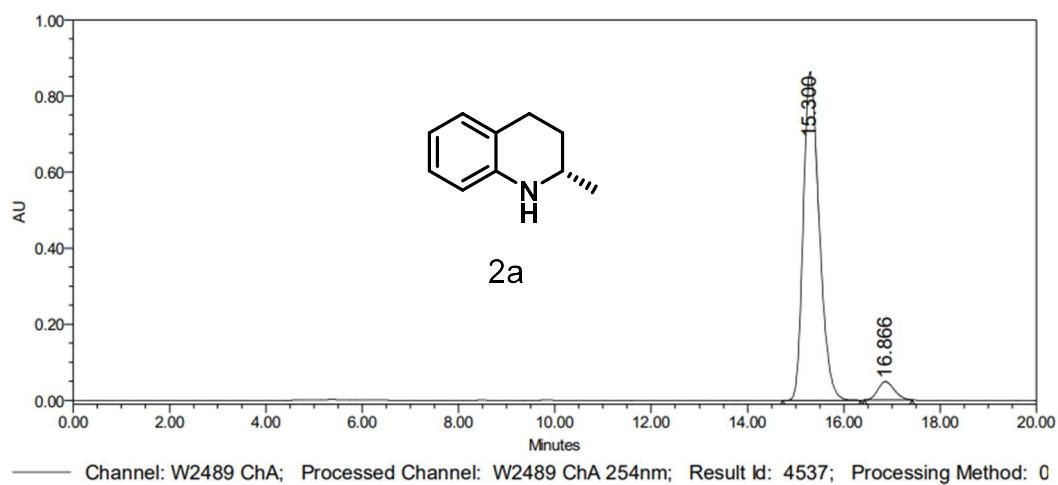

#### Processed Channel Descr.: W2489 ChA 254nm

|   | Processed Channel Descr. | RT     | Area     | % Area | Height |
|---|--------------------------|--------|----------|--------|--------|
| 1 | W2489 ChA 254nm          | 15.300 | 19865210 | 94.50  | 863653 |
| 2 | W2489 ChA 254nm          | 16.866 | 1157142  | 5.50   | 48490  |

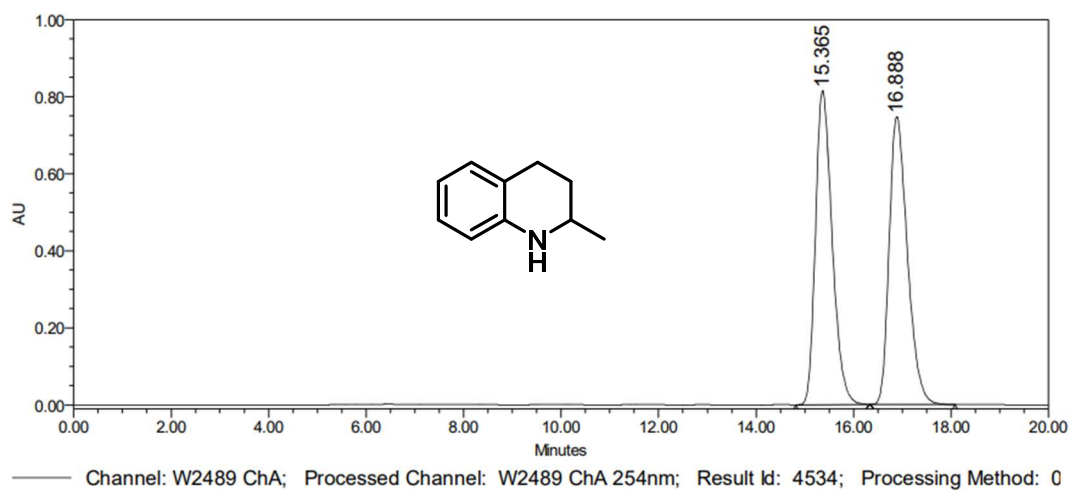

#### Processed Channel Descr.: W2489 ChA 254nm

|   | Processed Channel Descr. | RT     | Area     | % Area | Height |
|---|--------------------------|--------|----------|--------|--------|
| 1 | W2489 ChA 254nm          | 15.365 | 19408778 | 49.99  | 814896 |
| 2 | W2489 ChA 254nm          | 16.888 | 19418582 | 50.01  | 747283 |

**(S)-6-fluoro-2-methyl-1,2,3,4-tetrahydroquinoline (2b):**

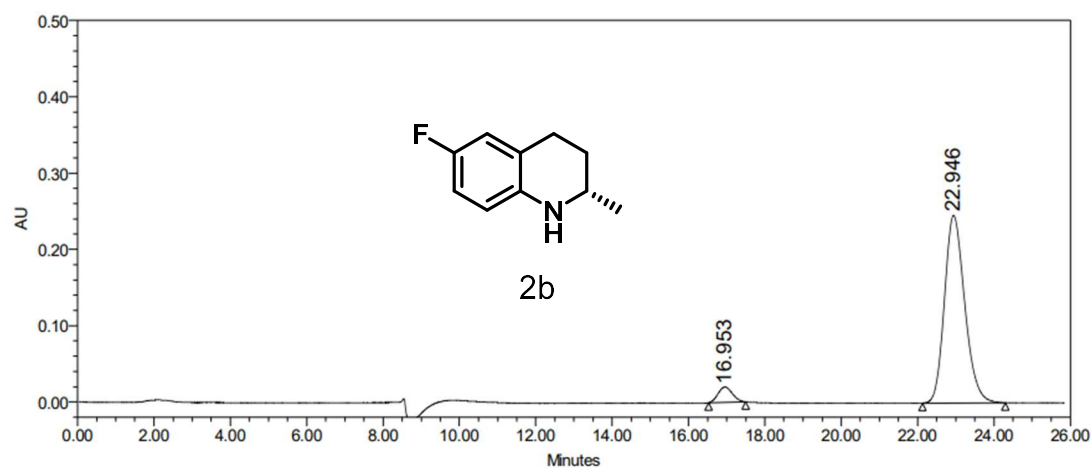

Channel: W2489 ChA; Processed Channel: W2489 ChA 254nm; Result Id: 3923; Processing Method: 0

**Processed Channel Descr.: W2489 ChA 254nm**

|   | Processed Channel Descr. | RT     | Area    | % Area | Height |
|---|--------------------------|--------|---------|--------|--------|
| 1 | W2489 ChA 254nm          | 16.953 | 522113  | 5.44   | 20116  |
| 2 | W2489 ChA 254nm          | 22.946 | 9075930 | 94.56  | 245689 |

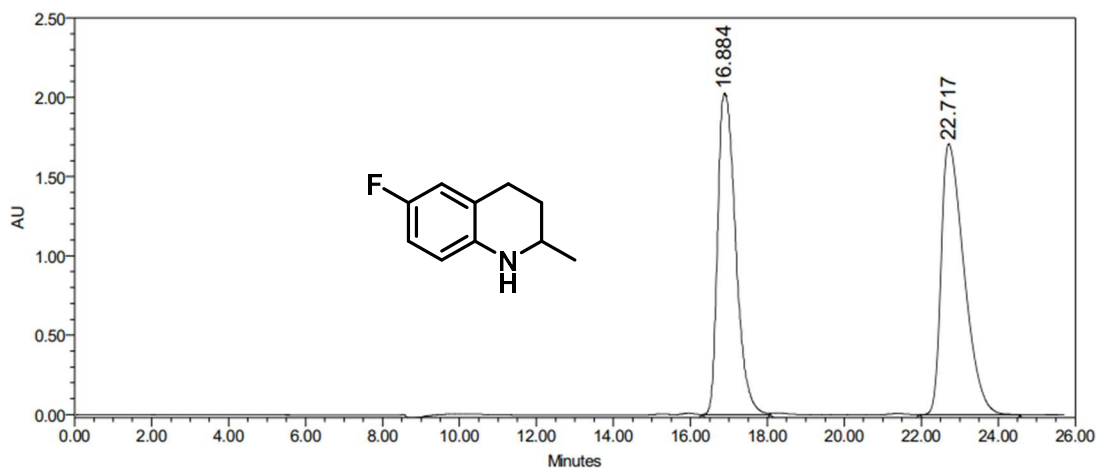

Channel: W2489 ChA; Processed Channel: W2489 ChA 254nm; Result Id: 3920; Processing Method: 0

**Processed Channel Descr.: W2489 ChA 254nm**

|   | Processed Channel Descr. | RT     | Area     | % Area | Height  |
|---|--------------------------|--------|----------|--------|---------|
| 1 | W2489 ChA 254nm          | 16.884 | 65880038 | 48.33  | 2026759 |
| 2 | W2489 ChA 254nm          | 22.717 | 70444454 | 51.67  | 1706753 |

**(S)-6-chloro-2-methyl-1,2,3,4-tetrahydroquinoline (2c):**

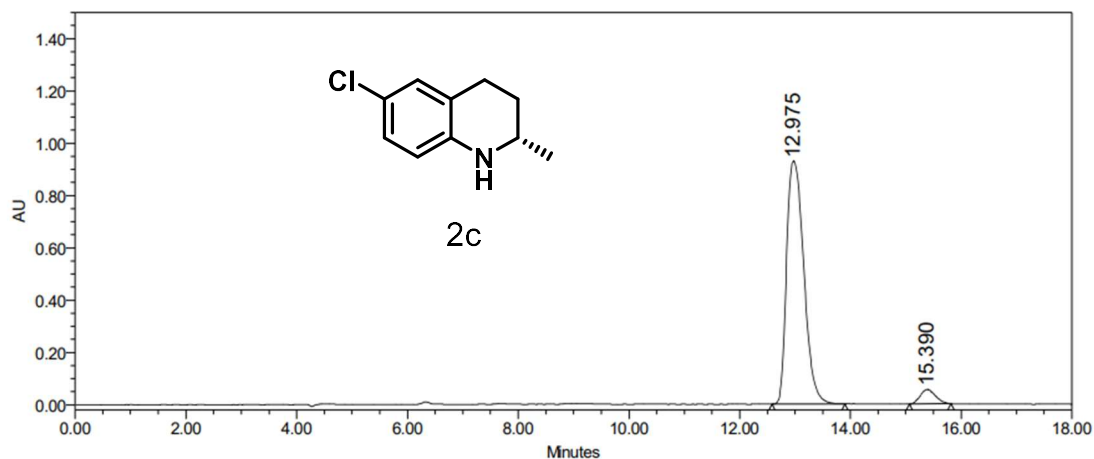

Channel: W2489 ChA; Processed Channel: W2489 ChA 254nm; Result Id: 3969; Processing Method: 0

**Processed Channel Descr.: W2489 ChA 254nm**

|   | Processed Channel Descr. | RT     | Area     | % Area | Height |
|---|--------------------------|--------|----------|--------|--------|
| 1 | W2489 ChA 254nm          | 12.975 | 20017619 | 95.05  | 930351 |
| 2 | W2489 ChA 254nm          | 15.390 | 1041614  | 4.95   | 54767  |

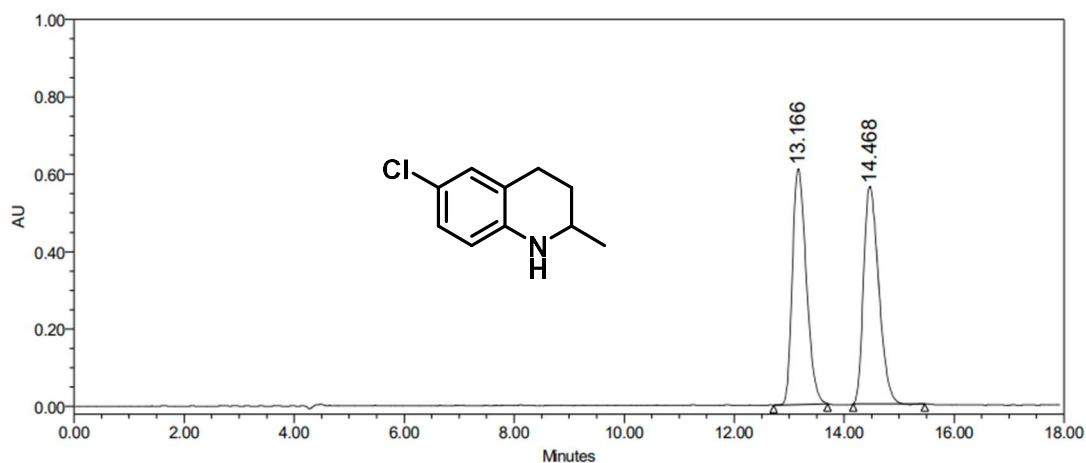

Channel: W2489 ChA; Processed Channel: W2489 ChA 254nm; Result Id: 3972; Processing Method: 0

**Processed Channel Descr.: W2489 ChA 254nm**

|   | Processed Channel Descr. | RT     | Area     | % Area | Height |
|---|--------------------------|--------|----------|--------|--------|
| 1 | W2489 ChA 254nm          | 13.166 | 10728039 | 49.86  | 608236 |
| 2 | W2489 ChA 254nm          | 14.468 | 10787741 | 50.14  | 560942 |

**(S)-6-bromo-2-methyl-1,2,3,4-tetrahydroquinoline (2d):**

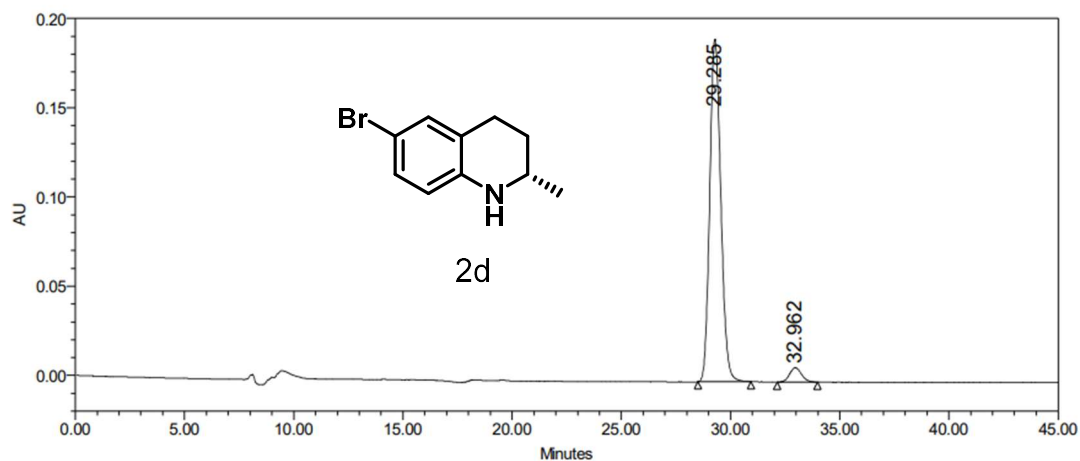

Channel: W2489 ChA; Processed Channel: W2489 ChA 254nm; Result Id: 3890; Processing Method: 0

**Processed Channel Descr.: W2489 ChA 254nm**

|   | Processed Channel Descr. | RT     | Area    | % Area | Height |
|---|--------------------------|--------|---------|--------|--------|
| 1 | W2489 ChA 254nm          | 29.285 | 6675876 | 95.65  | 191778 |
| 2 | W2489 ChA 254nm          | 32.962 | 303475  | 4.35   | 7992   |

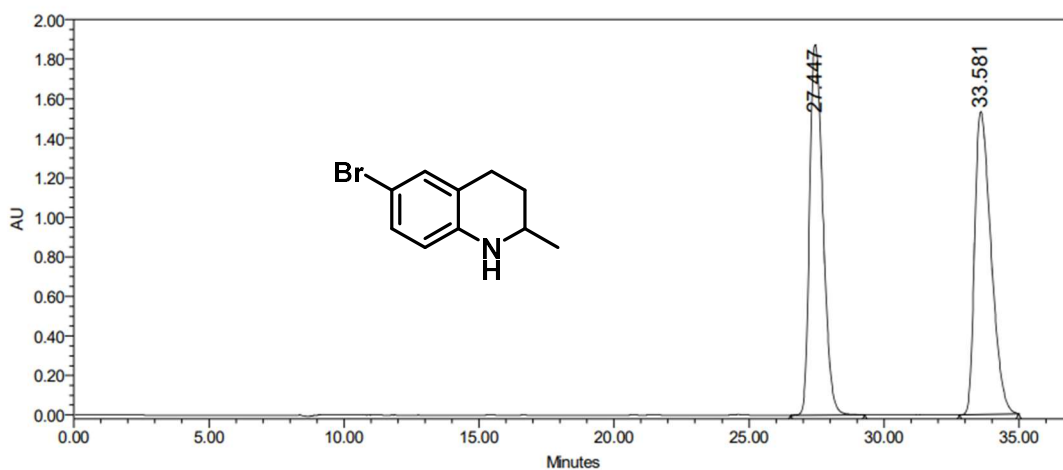

Channel: W2489 ChA; Processed Channel: W2489 ChA 254nm; Result Id: 3893; Processing Method: 0

**Processed Channel Descr.: W2489 ChA 254nm**

|   | Processed Channel Descr. | RT     | Area     | % Area | Height  |
|---|--------------------------|--------|----------|--------|---------|
| 1 | W2489 ChA 254nm          | 27.447 | 63823325 | 49.69  | 1872216 |
| 2 | W2489 ChA 254nm          | 33.581 | 64608655 | 50.31  | 1531591 |

**(S)-6-iodo-2-methyl-1,2,3,4-tetrahydroquinoline (2e):**

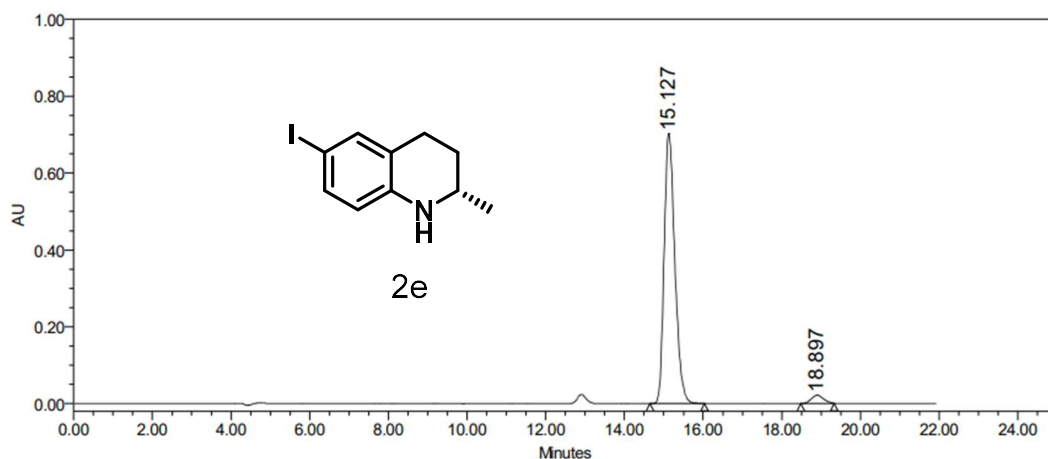

Channel: W2489 ChA; Processed Channel: W2489 ChA 254nm; Result Id: 3961; Processing Method: 0

**Processed Channel Descr.: W2489 ChA 254nm**

|   | Processed Channel Descr. | RT     | Area     | % Area | Height |
|---|--------------------------|--------|----------|--------|--------|
| 1 | W2489 ChA 254nm          | 15.127 | 13271183 | 96.63  | 702775 |
| 2 | W2489 ChA 254nm          | 18.897 | 463506   | 3.37   | 21329  |

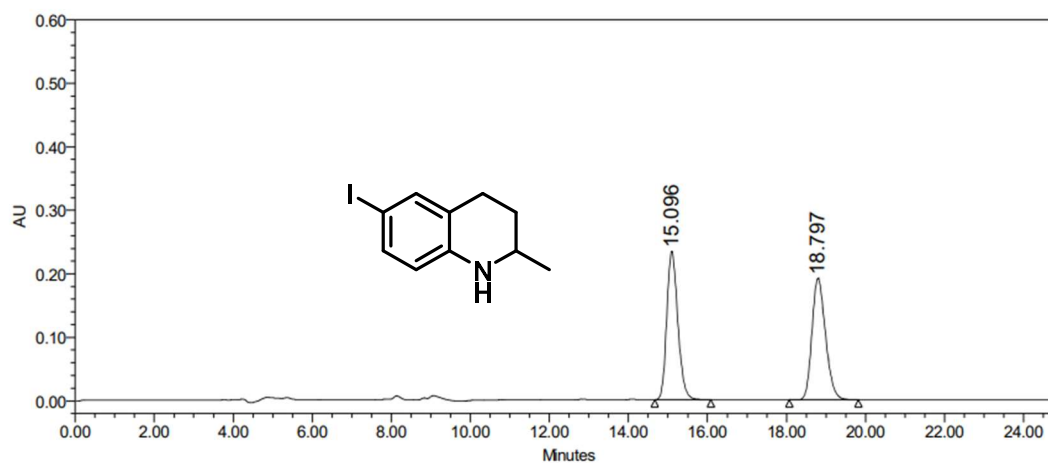

Channel: W2489 ChA; Processed Channel: W2489 ChA 254nm; Result Id: 3958; Processing Method: 0

**Processed Channel Descr.: W2489 ChA 254nm**

|   | Processed Channel Descr. | RT     | Area    | % Area | Height |
|---|--------------------------|--------|---------|--------|--------|
| 1 | W2489 ChA 254nm          | 15.096 | 4553854 | 49.99  | 233844 |
| 2 | W2489 ChA 254nm          | 18.797 | 4555823 | 50.01  | 191229 |

**(S)-7-chloro-2-methyl-1,2,3,4-tetrahydroquinoline (2f):**

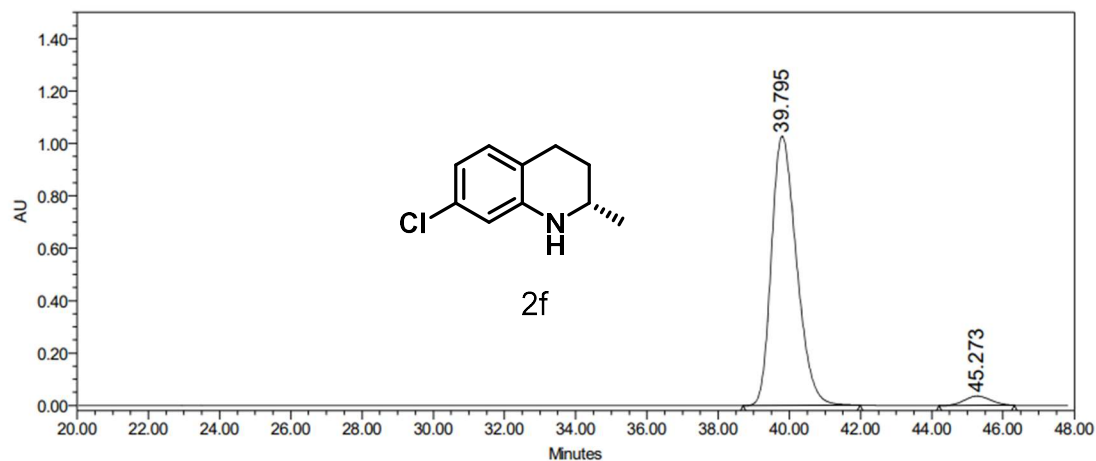

Channel: W2489 ChA; Processed Channel: W2489 ChA 254nm; Result Id: 3869; Processing Method: 0

**Processed Channel Descr.: W2489 ChA 254nm**

|   | Processed Channel Descr. | RT     | Area     | % Area | Height  |
|---|--------------------------|--------|----------|--------|---------|
| 1 | W2489 ChA 254nm          | 39.795 | 50341144 | 96.51  | 1027450 |
| 2 | W2489 ChA 254nm          | 45.273 | 1820975  | 3.49   | 35481   |

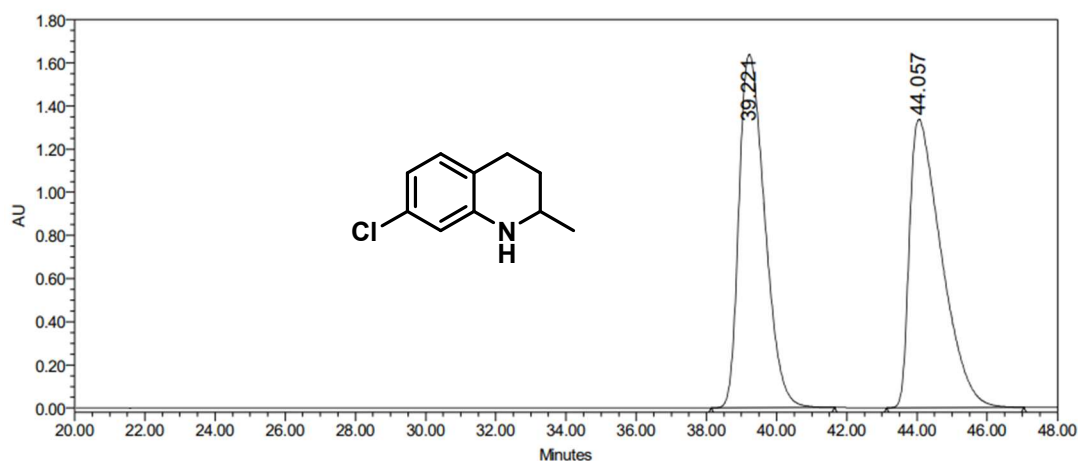

Channel: W2489 ChA; Processed Channel: W2489 ChA 254nm; Result Id: 3872; Processing Method: 0

**Processed Channel Descr.: W2489 ChA 254nm**

|   | Processed Channel Descr. | RT     | Area     | % Area | Height  |
|---|--------------------------|--------|----------|--------|---------|
| 1 | W2489 ChA 254nm          | 39.221 | 83281109 | 49.65  | 1638085 |
| 2 | W2489 ChA 254nm          | 44.057 | 84440657 | 50.35  | 1337321 |



**(S)-6-methoxy-2-methyl-1,2,3,4-tetrahydroquinoline (2g):**

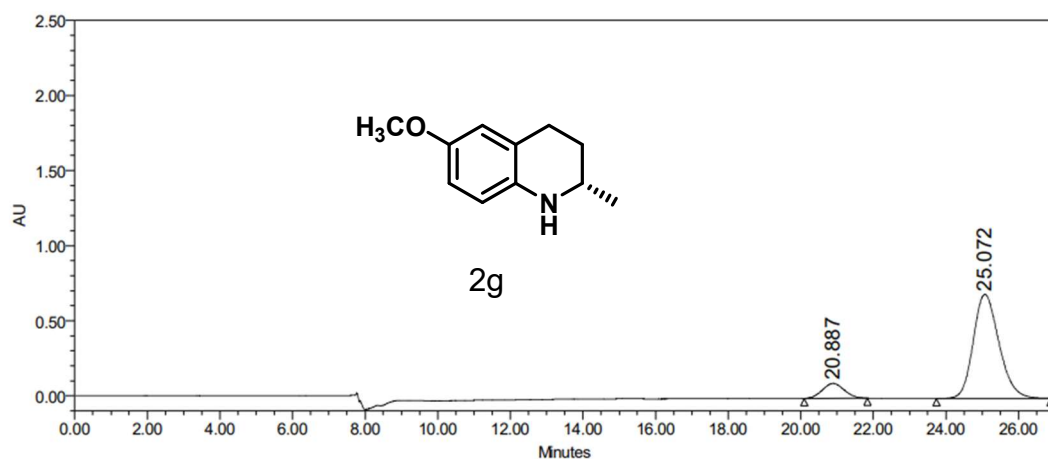

Channel: W2489 ChA; Processed Channel: W2489 ChA 254nm; Result Id: 3980; Processing Method: 0

**Processed Channel Descr.: W2489 ChA 254nm**

|   | Processed Channel Descr. | RT     | Area     | % Area | Height |
|---|--------------------------|--------|----------|--------|--------|
| 1 | W2489 ChA 254nm          | 20.887 | 4186415  | 10.91  | 99113  |
| 2 | W2489 ChA 254nm          | 25.072 | 34184883 | 89.09  | 693456 |

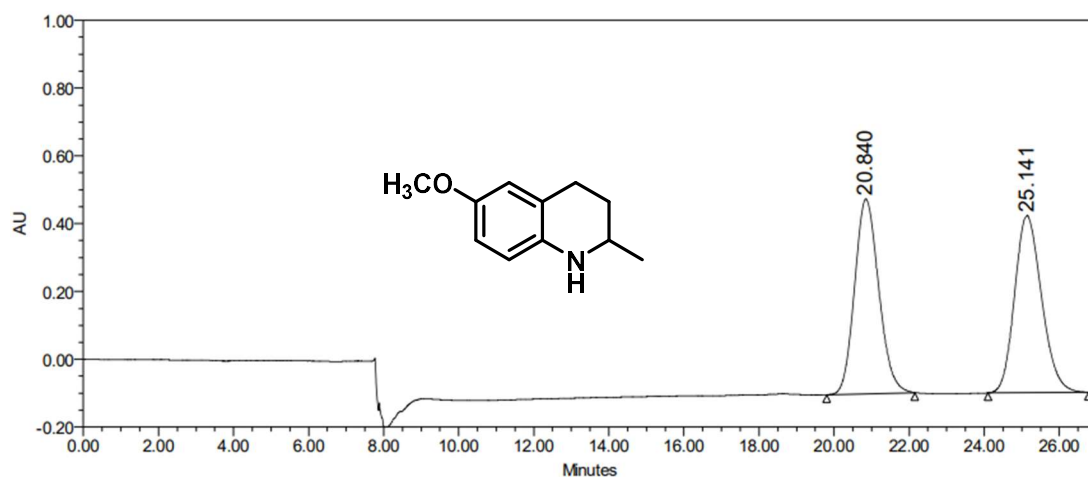

Channel: W2489 ChA; Processed Channel: W2489 ChA 254nm; Result Id: 3983; Processing Method: 0

**Processed Channel Descr.: W2489 ChA 254nm**

|   | Processed Channel Descr. | RT     | Area     | % Area | Height |
|---|--------------------------|--------|----------|--------|--------|
| 1 | W2489 ChA 254nm          | 20.840 | 25638673 | 49.60  | 574214 |
| 2 | W2489 ChA 254nm          | 25.141 | 26052337 | 50.40  | 522244 |



**(S)-2-methyl-6-phenyl-1,2,3,4-tetrahydroquinoline (2h):**

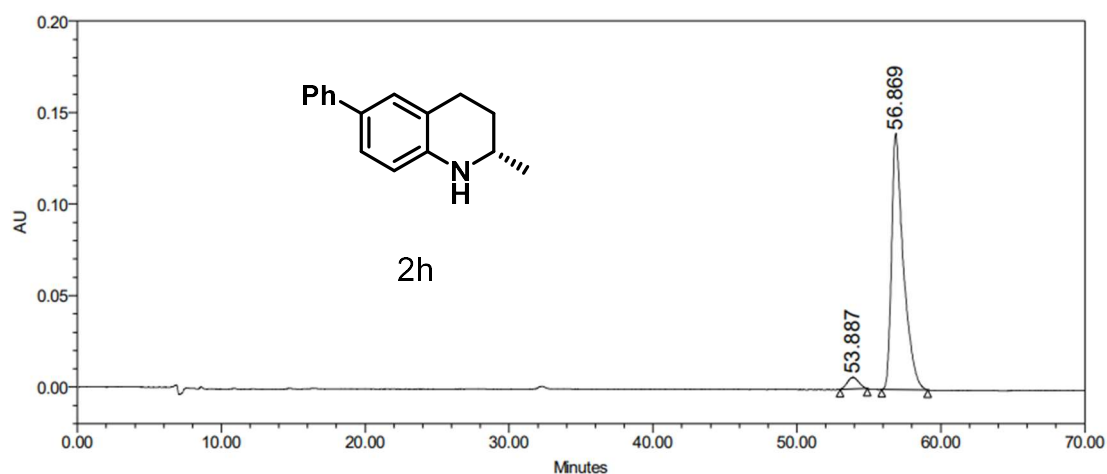

**Processed Channel Descr.: W2489 ChA 254nm**

|   | Processed Channel Descr. | RT     | Area    | % Area | Height |
|---|--------------------------|--------|---------|--------|--------|
| 1 | W2489 ChA 254nm          | 53.887 | 346804  | 4.17   | 6322   |
| 2 | W2489 ChA 254nm          | 56.869 | 7966291 | 95.83  | 139701 |

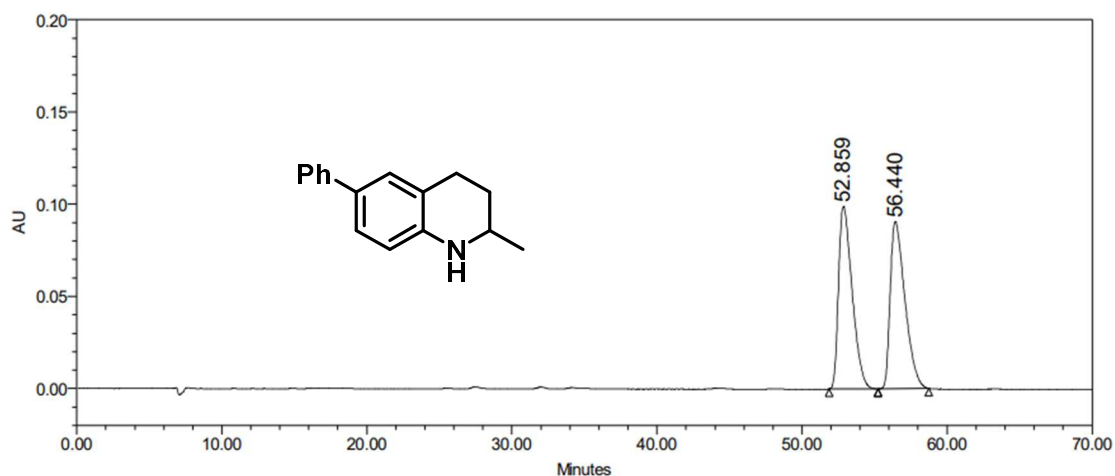

**Processed Channel Descr.: W2489 ChA 254nm**

|   | Processed Channel Descr. | RT     | Area    | % Area | Height |
|---|--------------------------|--------|---------|--------|--------|
| 1 | W2489 ChA 254nm          | 52.859 | 6442693 | 50.15  | 98914  |
| 2 | W2489 ChA 254nm          | 56.440 | 6403107 | 49.85  | 90557  |

**(S)-2-methyl-6-(pyridin-4-yl)-1,2,3,4-tetrahydroquinoline (2i):**

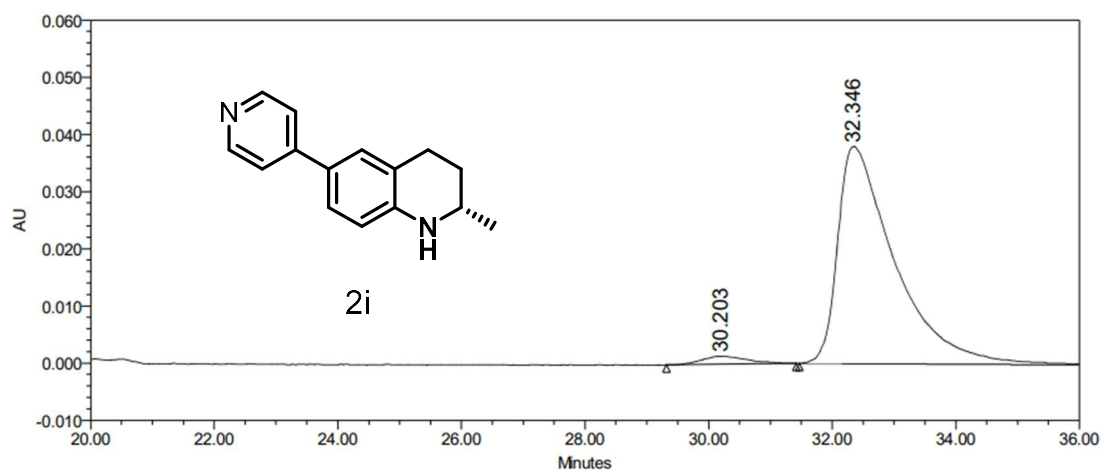

Channel: W2489 ChA; Processed Channel: W2489 ChA 254nm; Result Id: 4516; Processing Method: 0

**Processed Channel Descr.: W2489 ChA 254nm**

|   | Processed Channel Descr. | RT     | Area    | % Area | Height |
|---|--------------------------|--------|---------|--------|--------|
| 1 | W2489 ChA 254nm          | 30.203 | 72393   | 2.89   | 1431   |
| 2 | W2489 ChA 254nm          | 32.346 | 2436388 | 97.11  | 38007  |

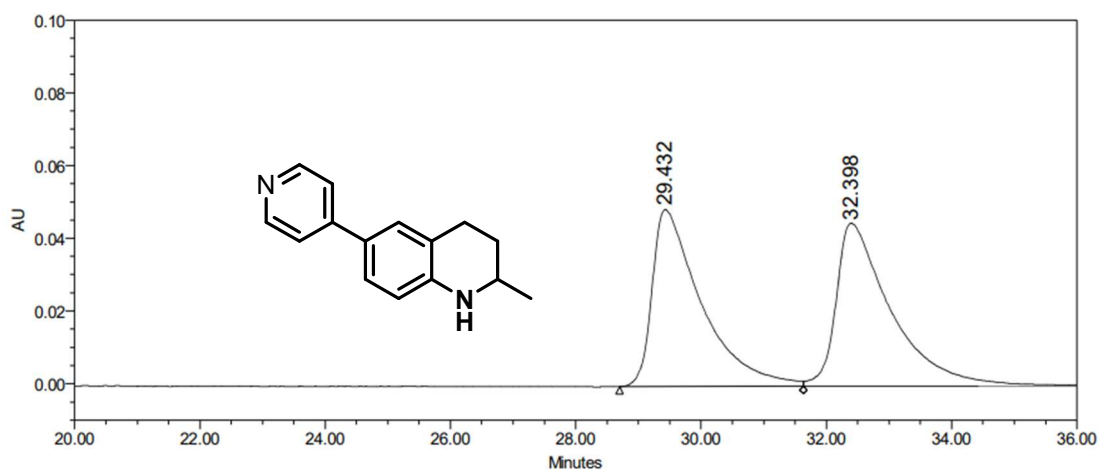

Channel: W2489 ChA; Processed Channel: W2489 ChA 254nm; Result Id: 4513; Processing Method: 0

**Processed Channel Descr.: W2489 ChA 254nm**

|   | Processed Channel Descr. | RT     | Area    | % Area | Height |
|---|--------------------------|--------|---------|--------|--------|
| 1 | W2489 ChA 254nm          | 29.432 | 2656884 | 49.37  | 48654  |
| 2 | W2489 ChA 254nm          | 32.398 | 2724850 | 50.63  | 44796  |

**(S)-2-methyl-6-(thiophen-2-yl)-1,2,3,4-tetrahydroquinoline (2j):**

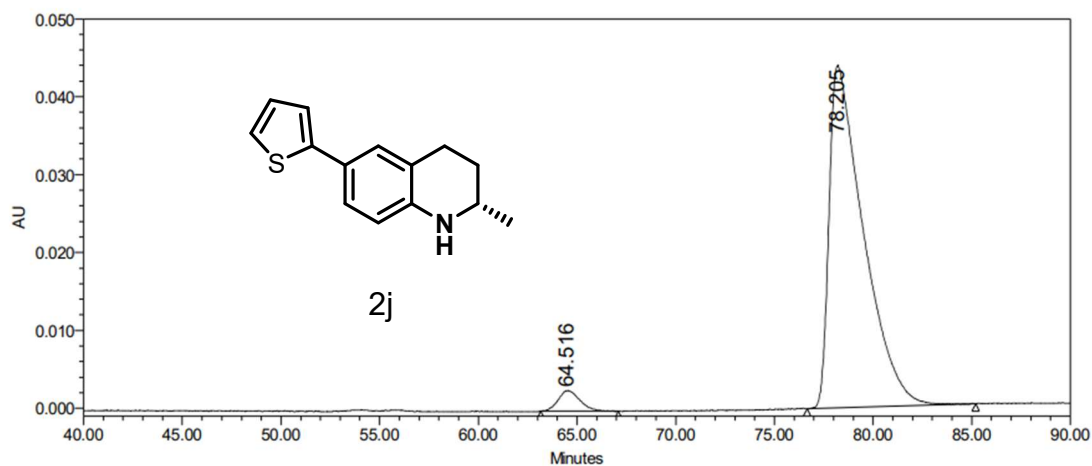

Channel: W2489 ChA; Processed Channel: W2489 ChA 254nm; Result Id: 4489; Processing Method: 0

**Processed Channel Descr.: W2489 ChA 254nm**

|   | Processed Channel Descr. | RT     | Area    | % Area | Height |
|---|--------------------------|--------|---------|--------|--------|
| 1 | W2489 ChA 254nm          | 64.516 | 199061  | 3.62   | 2605   |
| 2 | W2489 ChA 254nm          | 78.205 | 5299517 | 96.38  | 43968  |

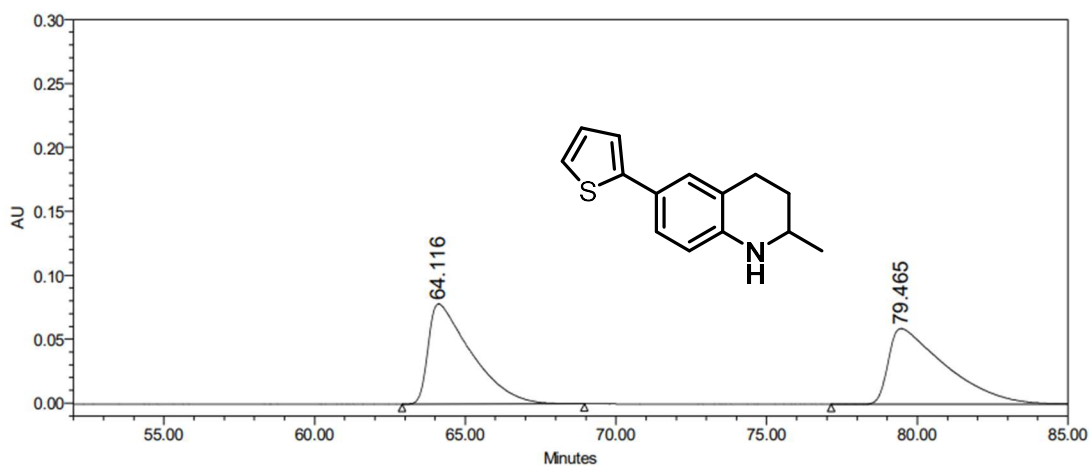

Channel: W2489 ChA; Processed Channel: W2489 ChA 254nm; Result Id: 4492; Processing Method: 0

**Processed Channel Descr.: W2489 ChA 254nm**

|   | Processed Channel Descr. | RT     | Area    | % Area | Height |
|---|--------------------------|--------|---------|--------|--------|
| 1 | W2489 ChA 254nm          | 64.116 | 7737979 | 49.95  | 78187  |
| 2 | W2489 ChA 254nm          | 79.465 | 7754212 | 50.05  | 59085  |

**(S)-N,N-dibutyl-2-methyl-1,2,3,4-tetrahydroquinoline-6-carboxamide (2k):**

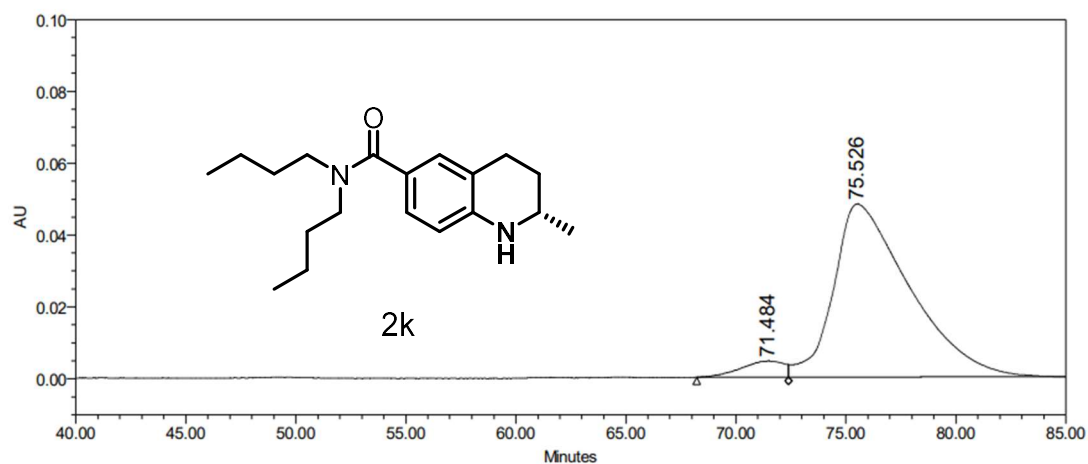

Channel: W2489 ChB; Processed Channel: W2489 ChB 254nm; Result Id: 4498; Processing Method: 0

**Processed Channel Descr.: W2489 ChB 254nm**

|   | Processed Channel Descr. | RT     | Area     | % Area | Height |
|---|--------------------------|--------|----------|--------|--------|
| 1 | W2489 ChB 254nm          | 71.484 | 603202   | 4.94   | 4518   |
| 2 | W2489 ChB 254nm          | 75.526 | 11611863 | 95.06  | 48158  |

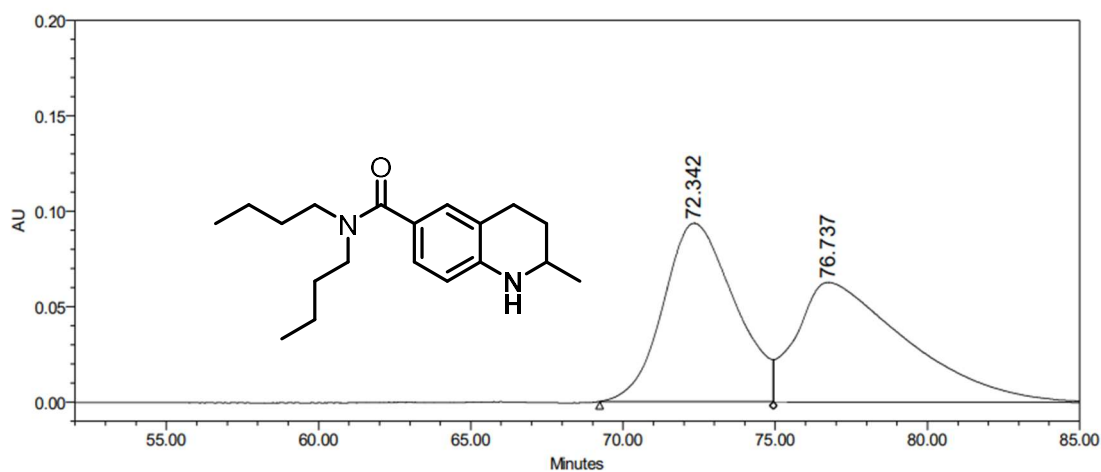

Channel: W2489 ChB; Processed Channel: W2489 ChB 254nm; Result Id: 4495; Processing Method: 0

**Processed Channel Descr.: W2489 ChB 254nm**

|   | Processed Channel Descr. | RT     | Area     | % Area | Height |
|---|--------------------------|--------|----------|--------|--------|
| 1 | W2489 ChB 254nm          | 72.342 | 15267594 | 49.11  | 93510  |
| 2 | W2489 ChB 254nm          | 76.737 | 15818215 | 50.89  | 62594  |

**(S)-(2-methyl-1,2,3,4-tetrahydroquinolin-6-yl)(morpholino)methanone (2l):**

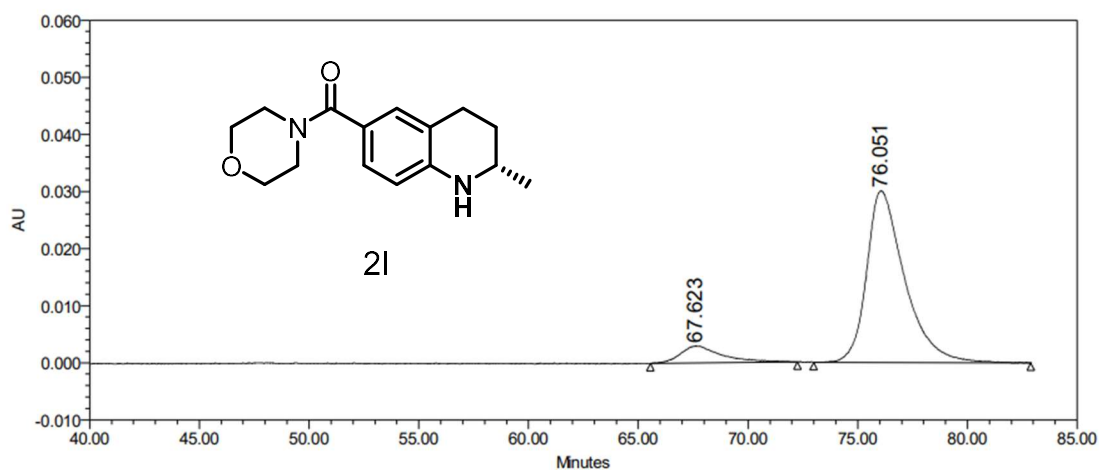

Channel: W2489 ChA; Processed Channel: W2489 ChA 254nm; Result Id: 4504; Processing Method: 0

**Processed Channel Descr.: W2489 ChA 254nm**

|   | Processed Channel Descr. | RT     | Area    | % Area | Height |
|---|--------------------------|--------|---------|--------|--------|
| 1 | W2489 ChA 254nm          | 67.623 | 391013  | 9.75   | 2963   |
| 2 | W2489 ChA 254nm          | 76.051 | 3620806 | 90.25  | 30029  |

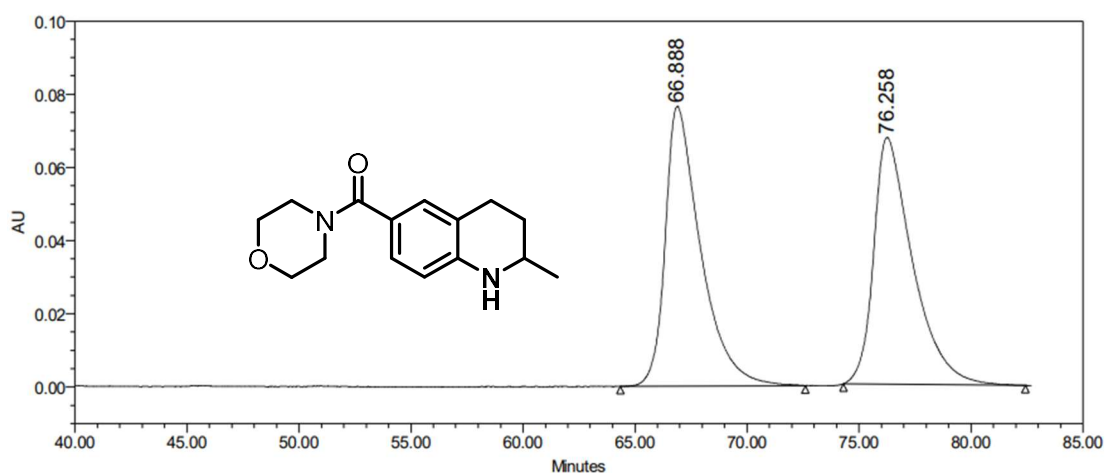

Channel: W2489 ChA; Processed Channel: W2489 ChA 254nm; Result Id: 4502; Processing Method: 0

**Processed Channel Descr.: W2489 ChA 254nm**

|   | Processed Channel Descr. | RT     | Area    | % Area | Height |
|---|--------------------------|--------|---------|--------|--------|
| 1 | W2489 ChA 254nm          | 66.888 | 8410373 | 50.71  | 76480  |
| 2 | W2489 ChA 254nm          | 76.258 | 8176399 | 49.29  | 67438  |

**(S)-(2-methyl-1,2,3,4-tetrahydroquinolin-6-yl)(pyrrolidin-1-yl)methanone (2m):**

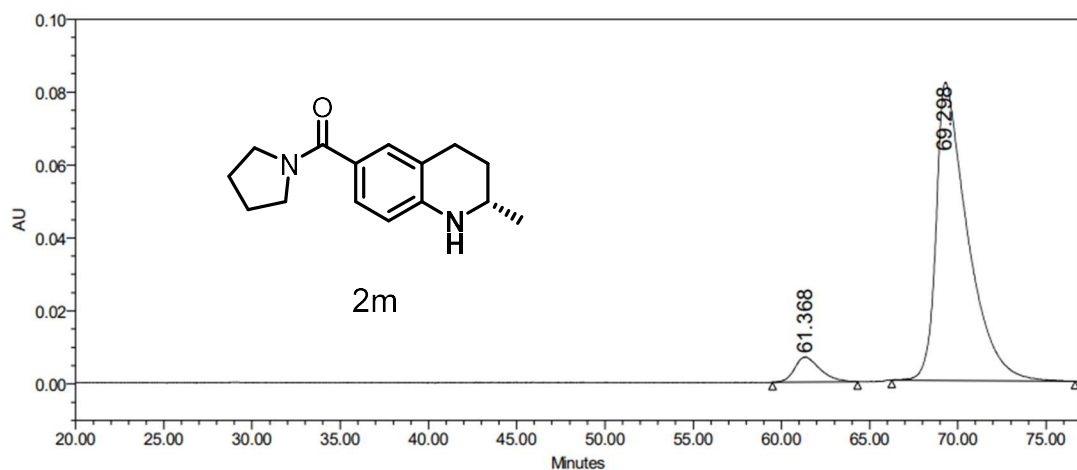

Channel: W2489 ChA; Processed Channel: W2489 ChA 254nm; Result Id: 4510; Processing Method: 0

**Processed Channel Descr.: W2489 ChA 254nm**

|   | Processed Channel Descr. | RT     | Area     | % Area | Height |
|---|--------------------------|--------|----------|--------|--------|
| 1 | W2489 ChA 254nm          | 61.368 | 686299   | 6.33   | 6858   |
| 2 | W2489 ChA 254nm          | 69.298 | 10156993 | 93.67  | 81736  |

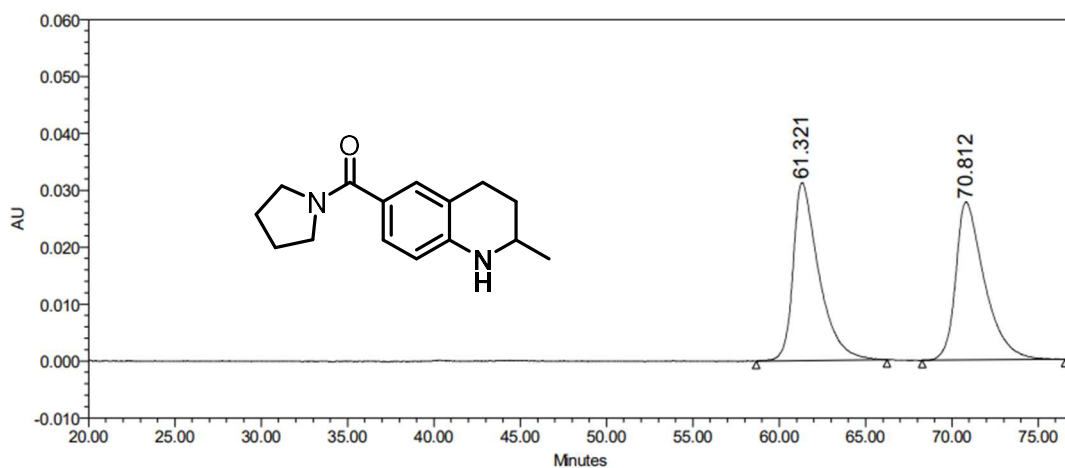

Channel: W2489 ChA; Processed Channel: W2489 ChA 254nm; Result Id: 4507; Processing Method: 0

**Processed Channel Descr.: W2489 ChA 254nm**

|   | Processed Channel Descr. | RT     | Area    | % Area | Height |
|---|--------------------------|--------|---------|--------|--------|
| 1 | W2489 ChA 254nm          | 61.321 | 3251687 | 50.25  | 31271  |
| 2 | W2489 ChA 254nm          | 70.812 | 3219175 | 49.75  | 27735  |

**(S)-2-ethyl-1,2,3,4-tetrahydroquinoline (2n):**

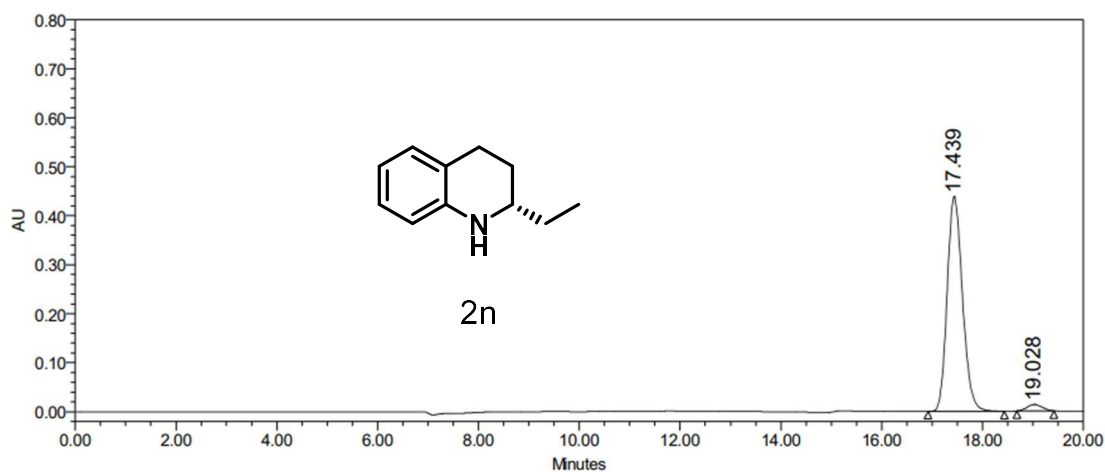

Channel: W2489 ChA; Processed Channel: W2489 ChA 254nm; Result Id: 4024; Processing Method: 0

**Processed Channel Descr.: W2489 ChA 254nm**

|   | Processed Channel Descr. | RT     | Area    | % Area | Height |
|---|--------------------------|--------|---------|--------|--------|
| 1 | W2489 ChA 254nm          | 17.439 | 9262279 | 97.11  | 438695 |
| 2 | W2489 ChA 254nm          | 19.028 | 275668  | 2.89   | 13049  |

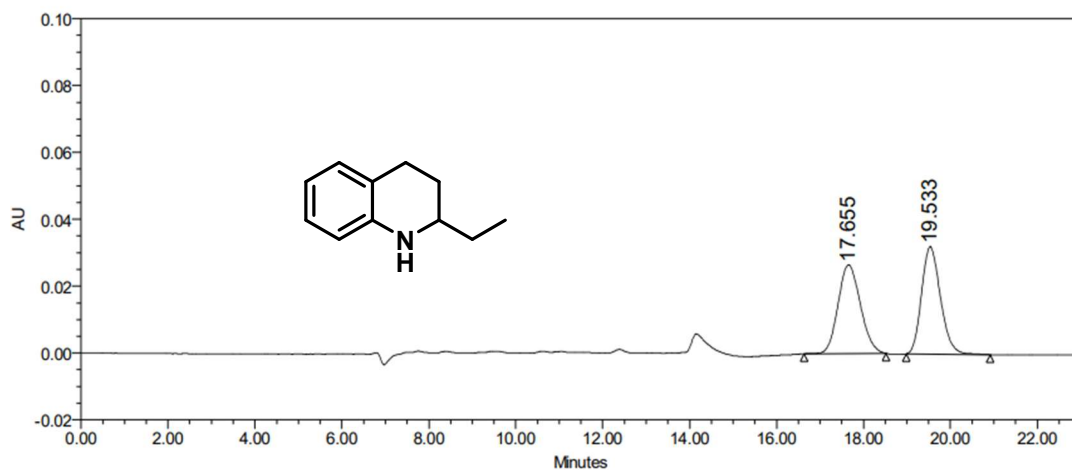

Channel: W2489 ChA; Processed Channel: W2489 ChA 254nm; Result Id: 4027; Processing Method: 0

**Processed Channel Descr.: W2489 ChA 254nm**

|   | Processed Channel Descr. | RT     | Area   | % Area | Height |
|---|--------------------------|--------|--------|--------|--------|
| 1 | W2489 ChA 254nm          | 17.655 | 947167 | 49.27  | 26477  |
| 2 | W2489 ChA 254nm          | 19.533 | 975220 | 50.73  | 32161  |



**(S)-2-propyl-1,2,3,4-tetrahydroquinoline (2o):**

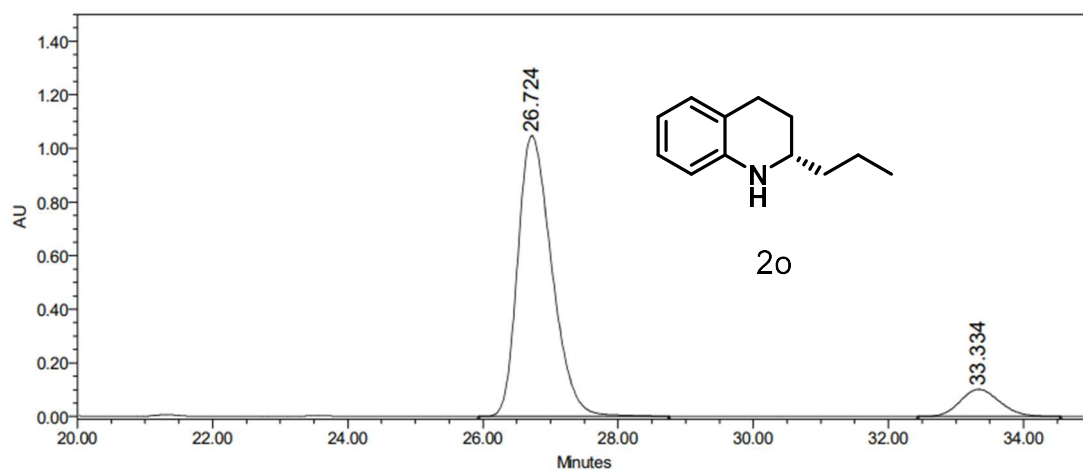

**Processed Channel Descr.: W2489 ChA 254nm**

|   | Processed Channel Descr. | RT     | Area     | % Area | Height  |
|---|--------------------------|--------|----------|--------|---------|
| 1 | W2489 ChA 254nm          | 26.724 | 36517447 | 89.86  | 1047470 |
| 2 | W2489 ChA 254nm          | 33.334 | 4120452  | 10.14  | 101325  |

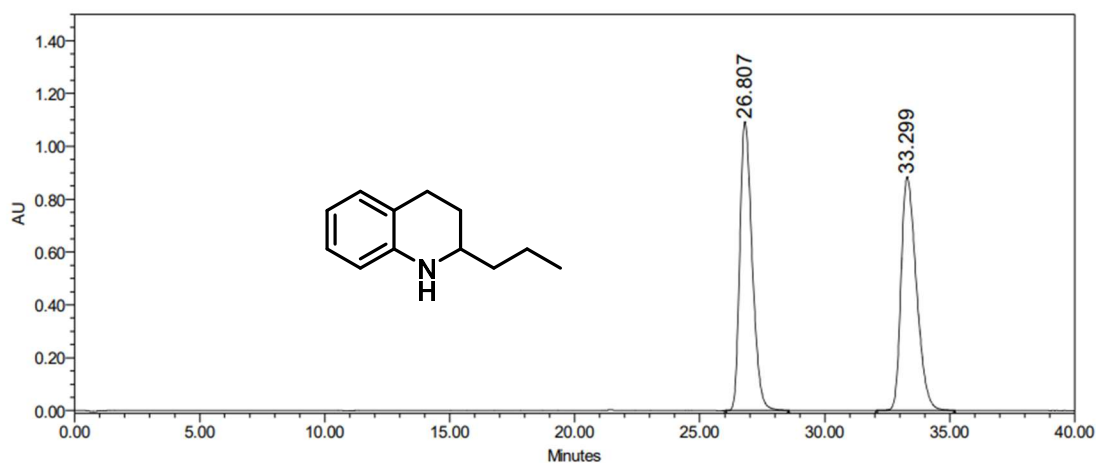

**Processed Channel Descr.: W2489 ChA 254nm**

|   | Processed Channel Descr. | RT     | Area     | % Area | Height  |
|---|--------------------------|--------|----------|--------|---------|
| 1 | W2489 ChA 254nm          | 26.807 | 37447334 | 49.83  | 1092756 |
| 2 | W2489 ChA 254nm          | 33.299 | 37704742 | 50.17  | 883333  |



**(S)-2-butyl-1,2,3,4-tetrahydroquinoline (2p):**

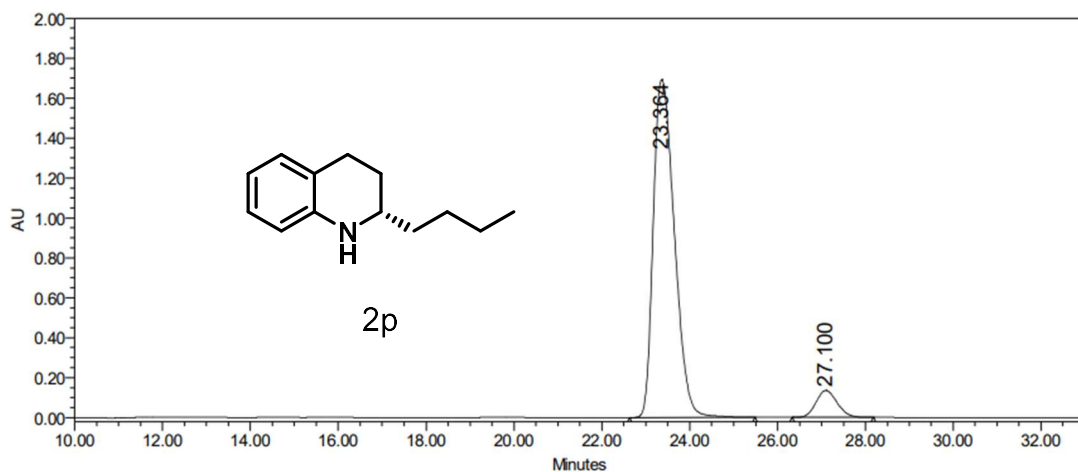

Channel: W2489 ChA; Processed Channel: W2489 ChA 254nm; Result Id: 4482; Processing Method: 0

**Processed Channel Descr.: W2489 ChA 254nm**

|   | Processed Channel Descr. | RT     | Area     | % Area | Height  |
|---|--------------------------|--------|----------|--------|---------|
| 1 | W2489 ChA 254nm          | 23.364 | 56428601 | 92.57  | 1693205 |
| 2 | W2489 ChA 254nm          | 27.100 | 4530511  | 7.43   | 135193  |

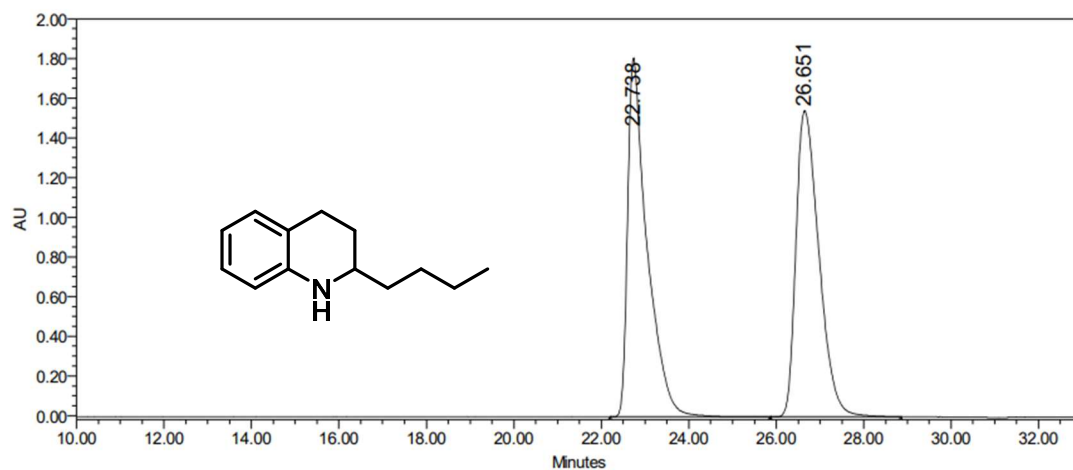

Channel: W2489 ChA; Processed Channel: W2489 ChA 254nm; Result Id: 4485; Processing Method: 0

**Processed Channel Descr.: W2489 ChA 254nm**

|   | Processed Channel Descr. | RT     | Area     | % Area | Height  |
|---|--------------------------|--------|----------|--------|---------|
| 1 | W2489 ChA 254nm          | 22.738 | 55727498 | 49.70  | 1809188 |
| 2 | W2489 ChA 254nm          | 26.651 | 56400013 | 50.30  | 1543517 |

**(S)-2-pentyl-1,2,3,4-tetrahydroquinoline (2q):**

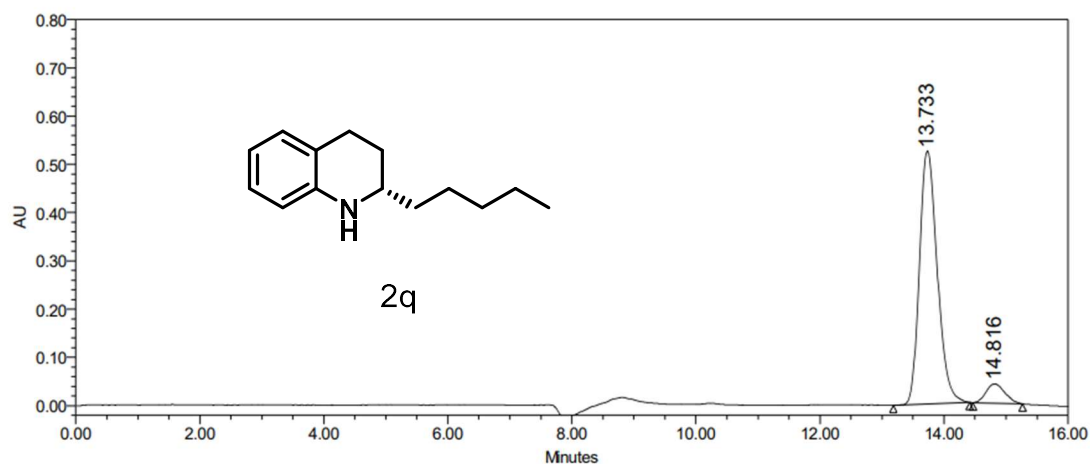

Channel: W2489 ChA; Processed Channel: W2489 ChA 254nm; Result Id: 3999; Processing Method: 0

**Processed Channel Descr.: W2489 ChA 254nm**

|   | Processed Channel Descr. | RT     | Area     | % Area | Height |
|---|--------------------------|--------|----------|--------|--------|
| 1 | W2489 ChA 254nm          | 13.733 | 10432770 | 92.52  | 523869 |
| 2 | W2489 ChA 254nm          | 14.816 | 843816   | 7.48   | 39956  |

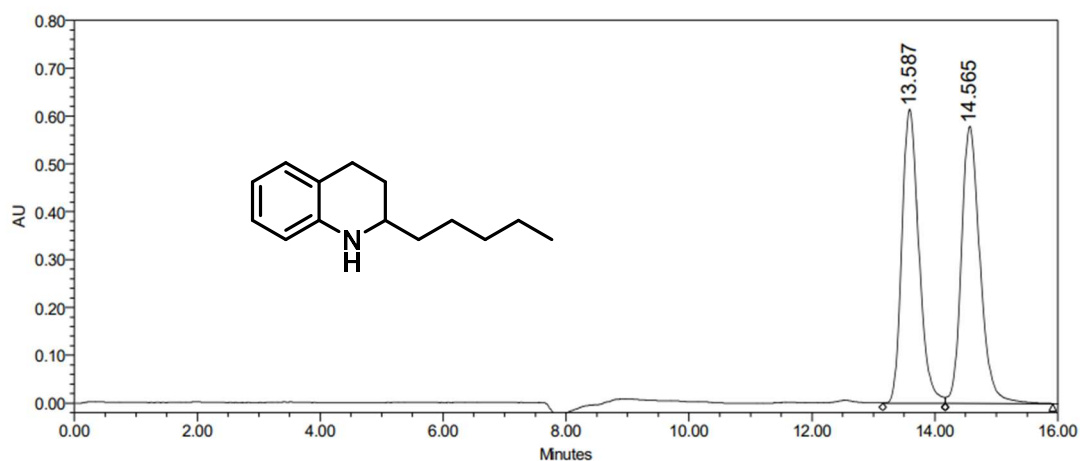

Channel: W2489 ChA; Processed Channel: W2489 ChA 254nm; Result Id: 4002; Processing Method: 0

**Processed Channel Descr.: W2489 ChA 254nm**

|   | Processed Channel Descr. | RT     | Area     | % Area | Height |
|---|--------------------------|--------|----------|--------|--------|
| 1 | W2489 ChA 254nm          | 13.587 | 11818787 | 49.19  | 614671 |
| 2 | W2489 ChA 254nm          | 14.565 | 12209976 | 50.81  | 578648 |

**(R)-2-isobutyl-1,2,3,4-tetrahydroquinoline (2r):**

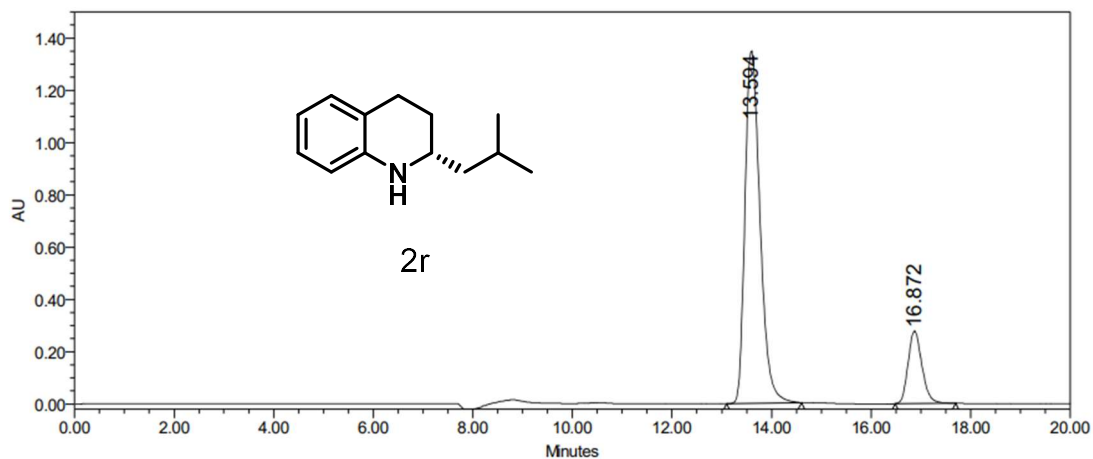

Channel: W2489 ChA; Processed Channel: W2489 ChA 254nm; Result Id: 3993; Processing Method: 0

**Processed Channel Descr.: W2489 ChA 254nm**

|   | Processed Channel Descr. | RT     | Area     | % Area | Height  |
|---|--------------------------|--------|----------|--------|---------|
| 1 | W2489 ChA 254nm          | 13.594 | 28241160 | 84.04  | 1348305 |
| 2 | W2489 ChA 254nm          | 16.872 | 5364803  | 15.96  | 276522  |

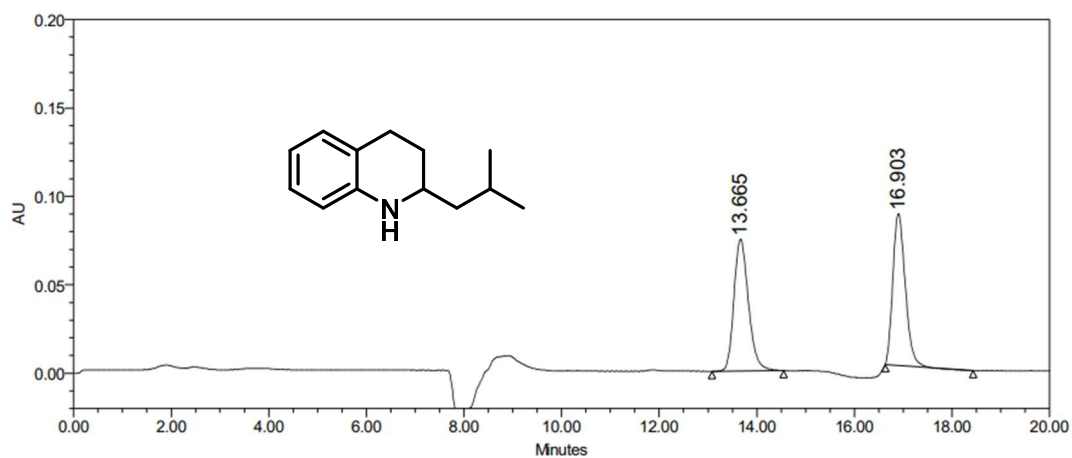

Channel: W2489 ChA; Processed Channel: W2489 ChA 254nm; Result Id: 3996; Processing Method: 0

**Processed Channel Descr.: W2489 ChA 254nm**

|   | Processed Channel Descr. | RT     | Area    | % Area | Height |
|---|--------------------------|--------|---------|--------|--------|
| 1 | W2489 ChA 254nm          | 13.665 | 1536300 | 50.04  | 74510  |
| 2 | W2489 ChA 254nm          | 16.903 | 1533768 | 49.96  | 85744  |

**(R)-2-(cyclohexylmethyl)-1,2,3,4-tetrahydroquinoline (2s):**

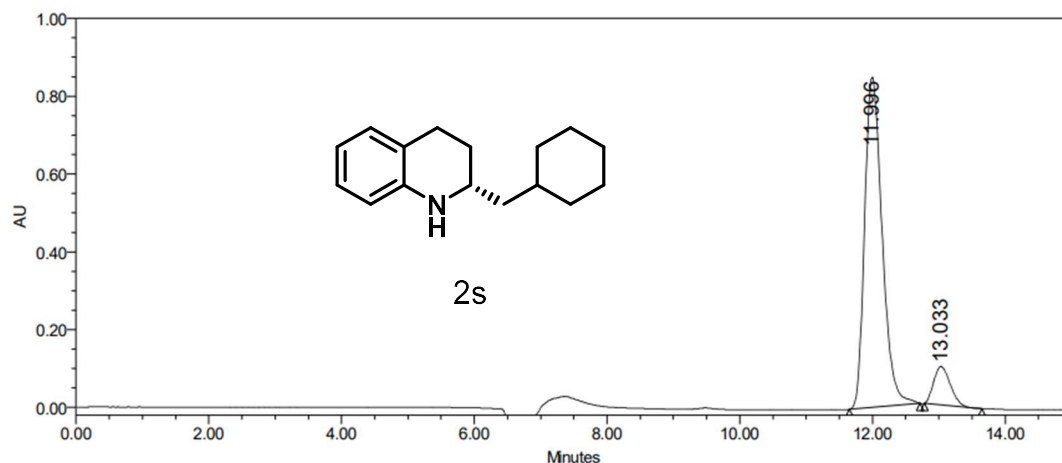

Channel: W2489 ChB; Processed Channel: W2489 ChB 254nm; Result Id: 3987; Processing Method: 0

**Processed Channel Descr.: W2489 ChB 254nm**

|   | Processed Channel Descr. | RT     | Area     | % Area | Height |
|---|--------------------------|--------|----------|--------|--------|
| 1 | W2489 ChB 254nm          | 11.996 | 15563213 | 90.09  | 848729 |
| 2 | W2489 ChB 254nm          | 13.033 | 1711807  | 9.91   | 98757  |

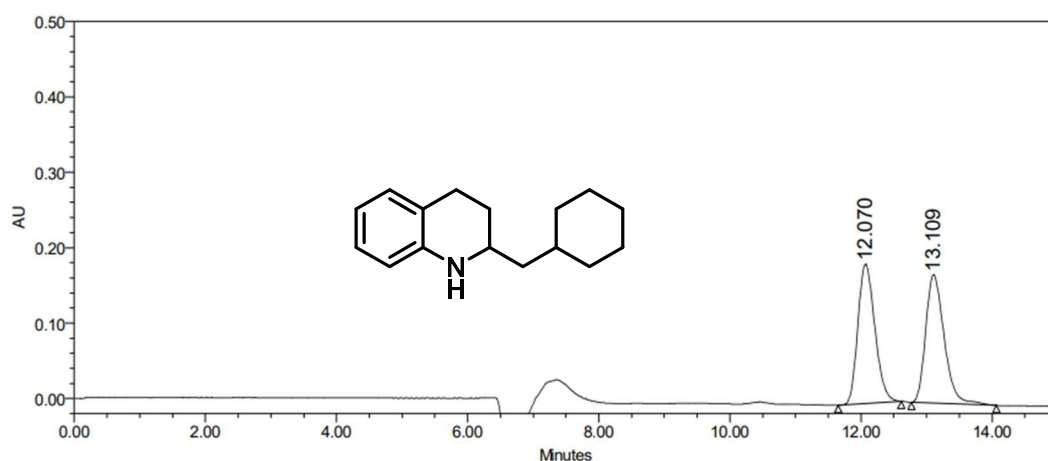

Channel: W2489 ChB; Processed Channel: W2489 ChB 254nm; Result Id: 3990; Processing Method: 0

**Processed Channel Descr.: W2489 ChB 254nm**

|   | Processed Channel Descr. | RT     | Area    | % Area | Height |
|---|--------------------------|--------|---------|--------|--------|
| 1 | W2489 ChB 254nm          | 12.070 | 3320809 | 49.86  | 184645 |
| 2 | W2489 ChB 254nm          | 13.109 | 3339712 | 50.14  | 170031 |

**(S)-2-(2-cyclohexylethyl)-1,2,3,4-tetrahydroquinoline (2t):**

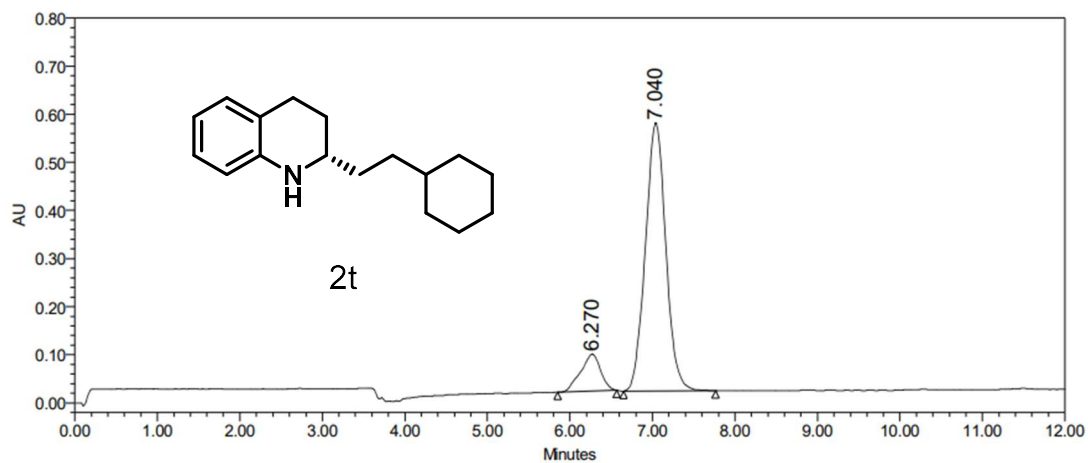

Channel: W2489 ChB; Processed Channel: W2489 ChB 254nm; Result Id: 4010; Processing Method: 0

**Processed Channel Descr.: W2489 ChB 254nm**

|   | Processed Channel Descr. | RT    | Area    | % Area | Height |
|---|--------------------------|-------|---------|--------|--------|
| 1 | W2489 ChB 254nm          | 6.270 | 1295440 | 11.92  | 76746  |
| 2 | W2489 ChB 254nm          | 7.040 | 9571215 | 88.08  | 557802 |

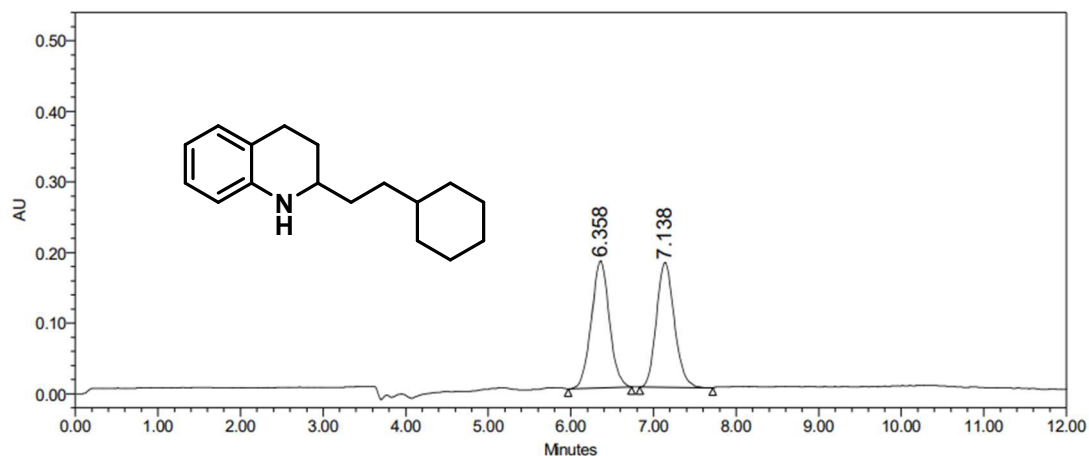

Channel: W2489 ChB; Processed Channel: W2489 ChB 254nm; Result Id: 4012; Processing Method: 0

**Processed Channel Descr.: W2489 ChB 254nm**

|   | Processed Channel Descr. | RT    | Area    | % Area | Height |
|---|--------------------------|-------|---------|--------|--------|
| 1 | W2489 ChB 254nm          | 6.358 | 2732621 | 50.51  | 180069 |
| 2 | W2489 ChB 254nm          | 7.138 | 2677074 | 49.49  | 177109 |

**(S)-2-(4-methoxyphenethyl)-1,2,3,4-tetrahydroquinoline (2u):**

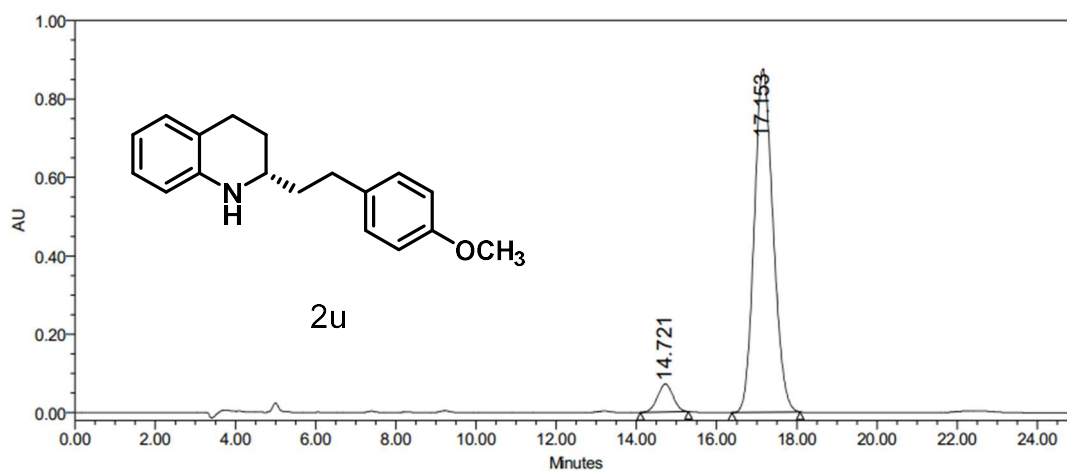

Channel: W2489 ChB; Processed Channel: W2489 ChB 254nm; Result Id: 3964; Processing Method: 0

**Processed Channel Descr.: W2489 ChB 254nm**

|   | Processed Channel Descr. | RT     | Area     | % Area | Height |
|---|--------------------------|--------|----------|--------|--------|
| 1 | W2489 ChB 254nm          | 14.721 | 1904095  | 6.27   | 71237  |
| 2 | W2489 ChB 254nm          | 17.153 | 28488331 | 93.73  | 875177 |

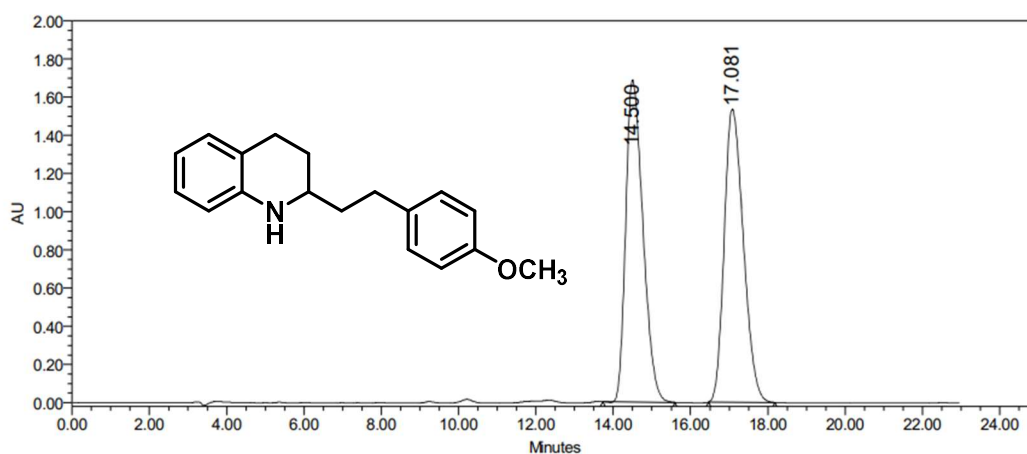

Channel: W2489 ChB; Processed Channel: W2489 ChB 254nm; Result Id: 3966; Processing Method: 0

**Processed Channel Descr.: W2489 ChB 254nm**

|   | Processed Channel Descr. | RT     | Area     | % Area | Height  |
|---|--------------------------|--------|----------|--------|---------|
| 1 | W2489 ChB 254nm          | 14.500 | 51942568 | 49.57  | 1684058 |
| 2 | W2489 ChB 254nm          | 17.081 | 52854007 | 50.43  | 1533517 |

**(S)-2-phenethyl-1,2,3,4-tetrahydroquinoline (2v):**

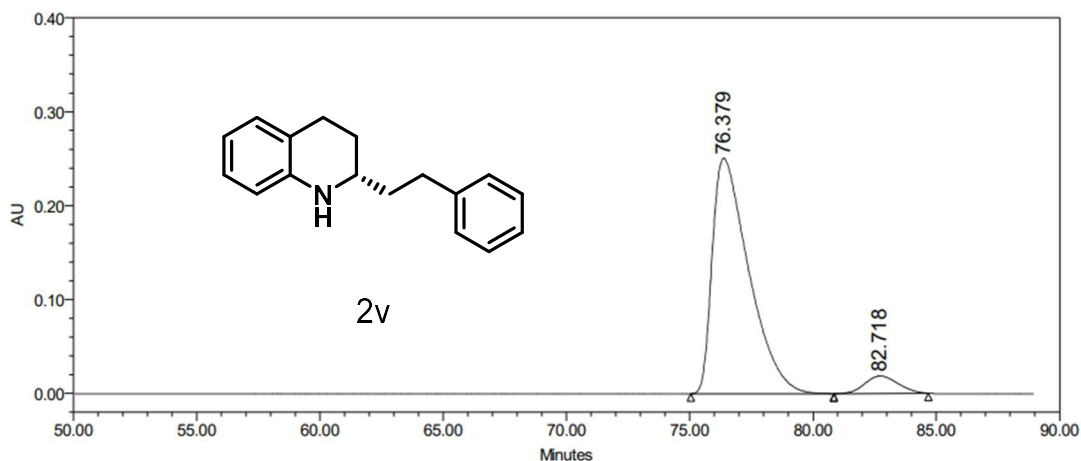

Channel: W2489 ChA; Processed Channel: W2489 ChA 254nm; Result Id: 3867; Processing Method: 0

**Processed Channel Descr.: W2489 ChA 254nm**

|   | Processed Channel Descr. | RT     | Area     | % Area | Height |
|---|--------------------------|--------|----------|--------|--------|
| 1 | W2489 ChA 254nm          | 76.379 | 25840465 | 93.69  | 250850 |
| 2 | W2489 ChA 254nm          | 82.718 | 1739053  | 6.31   | 18602  |

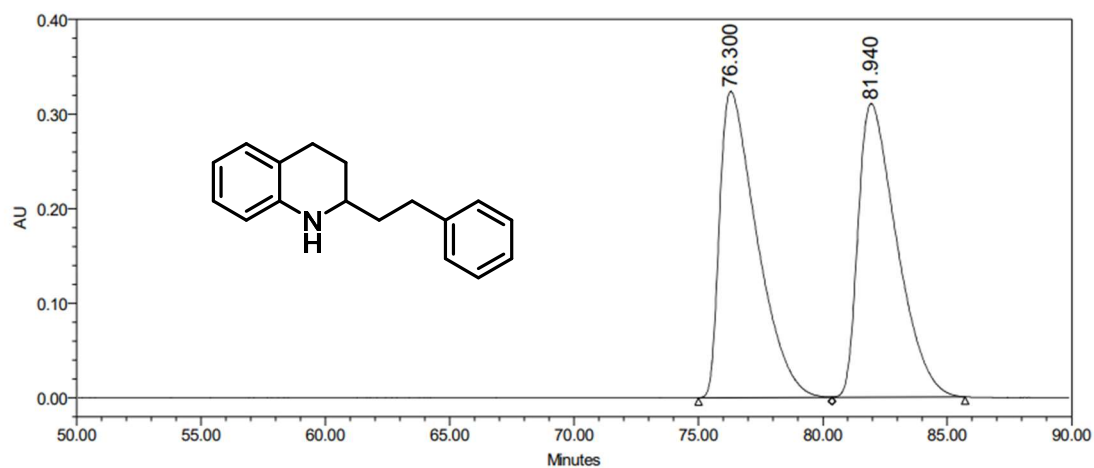

Channel: W2489 ChA; Processed Channel: W2489 ChA 254nm; Result Id: 3859; Processing Method: 0

**Processed Channel Descr.: W2489 ChA 254nm**

|   | Processed Channel Descr. | RT     | Area     | % Area | Height |
|---|--------------------------|--------|----------|--------|--------|
| 1 | W2489 ChA 254nm          | 76.300 | 33678329 | 50.12  | 323721 |
| 2 | W2489 ChA 254nm          | 81.940 | 33516640 | 49.88  | 310305 |



**(S)-2-(4-methylphenethyl)-1,2,3,4-tetrahydroquinoline (2w):**

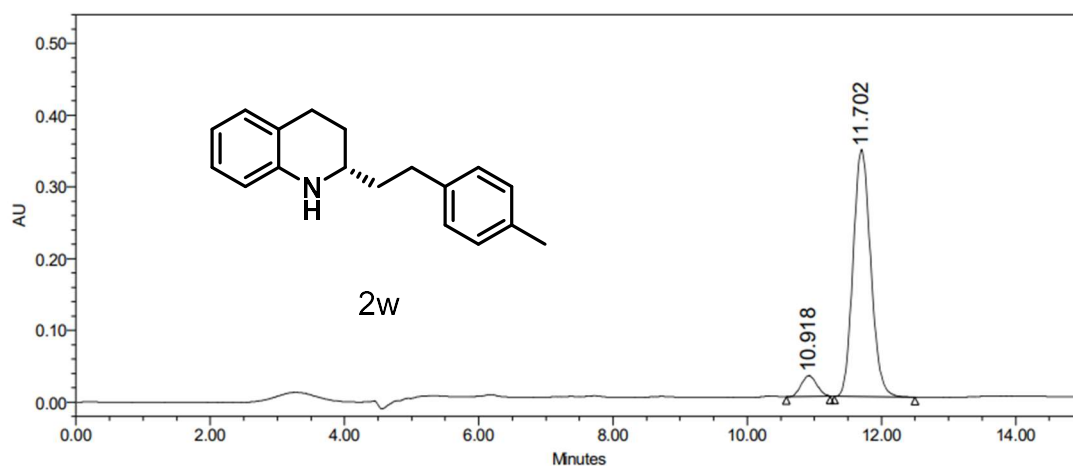

Channel: W2489 ChA; Processed Channel: W2489 ChA 254nm; Result Id: 4015; Processing Method: 0

**Processed Channel Descr.: W2489 ChA 254nm**

|   | Processed Channel Descr. | RT     | Area    | % Area | Height |
|---|--------------------------|--------|---------|--------|--------|
| 1 | W2489 ChA 254nm          | 10.918 | 465624  | 6.90   | 28924  |
| 2 | W2489 ChA 254nm          | 11.702 | 6278668 | 93.10  | 344229 |

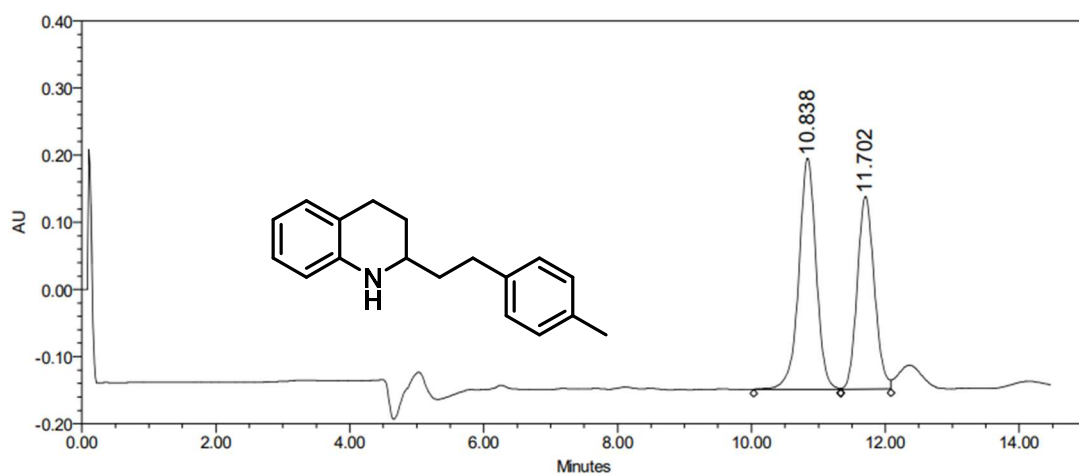

Channel: W2489 ChA; Processed Channel: W2489 ChA 254nm; Result Id: 4018; Processing Method: 0

**Processed Channel Descr.: W2489 ChA 254nm**

|   | Processed Channel Descr. | RT     | Area    | % Area | Height |
|---|--------------------------|--------|---------|--------|--------|
| 1 | W2489 ChA 254nm          | 10.838 | 6190757 | 54.91  | 344269 |
| 2 | W2489 ChA 254nm          | 11.702 | 5083955 | 45.09  | 286725 |



**(S)-2-(3-fluorophenethyl)-1,2,3,4-tetrahydroquinoline (2x):**

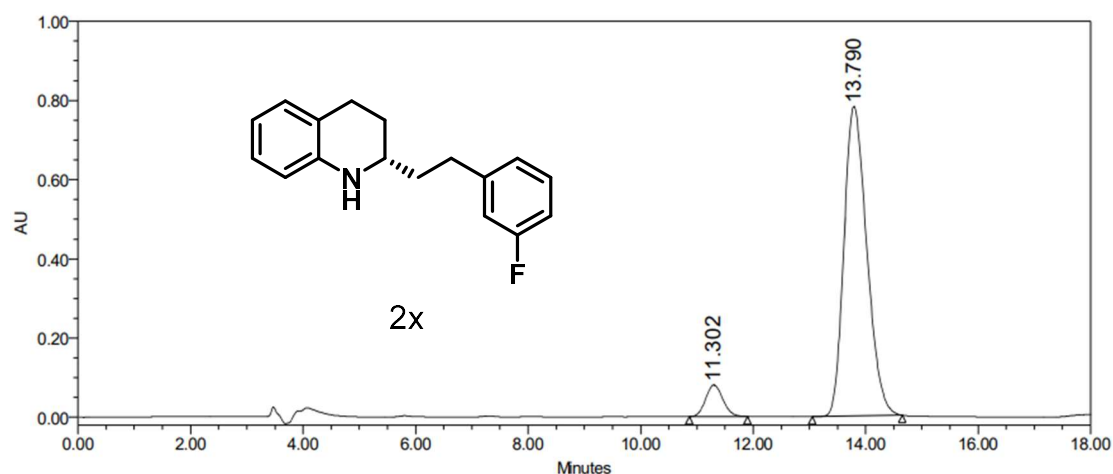

Channel: W2489 ChB; Processed Channel: W2489 ChB 254nm; Result Id: 3975; Processing Method: 0

**Processed Channel Descr.: W2489 ChB 254nm**

|   | Processed Channel Descr. | RT     | Area     | % Area | Height |
|---|--------------------------|--------|----------|--------|--------|
| 1 | W2489 ChB 254nm          | 11.302 | 1699536  | 7.15   | 79903  |
| 2 | W2489 ChB 254nm          | 13.790 | 22056558 | 92.85  | 781607 |

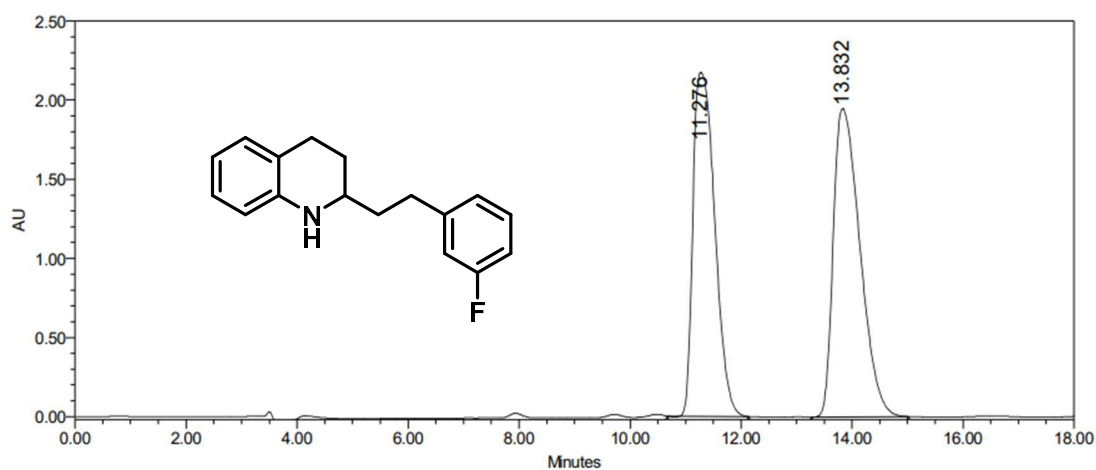

Channel: W2489 ChB; Processed Channel: W2489 ChB 254nm; Result Id: 3977; Processing Method: 0

**Processed Channel Descr.: W2489 ChB 254nm**

|   | Processed Channel Descr. | RT     | Area     | % Area | Height  |
|---|--------------------------|--------|----------|--------|---------|
| 1 | W2489 ChB 254nm          | 11.276 | 59375946 | 47.75  | 2173735 |
| 2 | W2489 ChB 254nm          | 13.832 | 64974645 | 52.25  | 1948485 |

**(S)-2-(3-chlorophenethyl)-1,2,3,4-tetrahydroquinoline (2y):**

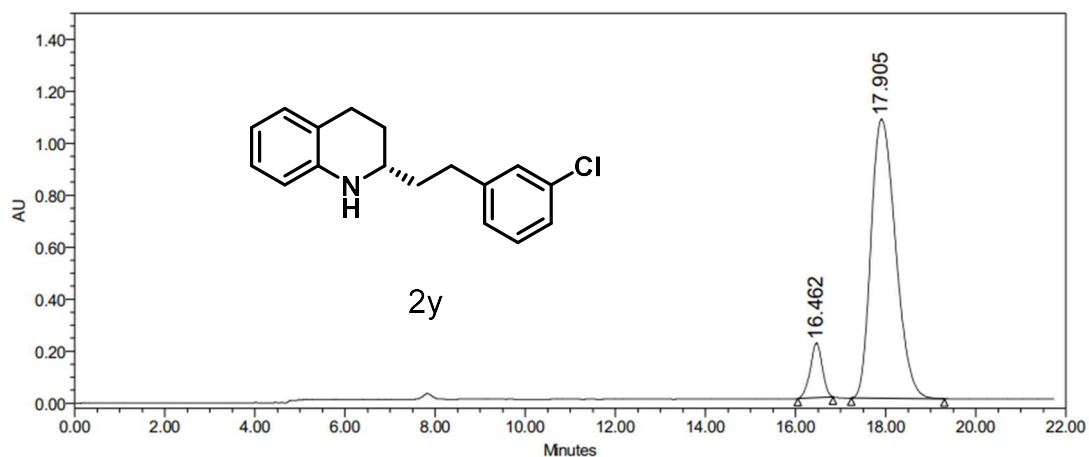

**Processed Channel Descr.: W2489 ChA 254nm**

|   | Processed Channel Descr. | RT     | Area     | % Area | Height  |
|---|--------------------------|--------|----------|--------|---------|
| 1 | W2489 ChA 254nm          | 16.462 | 3896081  | 8.74   | 209686  |
| 2 | W2489 ChA 254nm          | 17.905 | 40659348 | 91.26  | 1073762 |

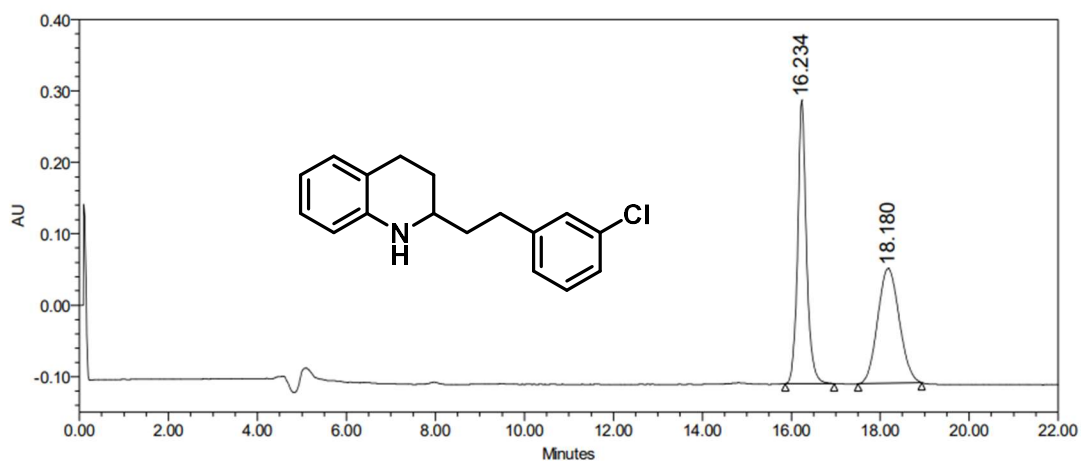

**Processed Channel Descr.: W2489 ChA 254nm**

|   | Processed Channel Descr. | RT     | Area    | % Area | Height |
|---|--------------------------|--------|---------|--------|--------|
| 1 | W2489 ChA 254nm          | 16.234 | 5461019 | 50.11  | 396822 |
| 2 | W2489 ChA 254nm          | 18.180 | 5436178 | 49.89  | 161027 |

**(S)-2-(2-methylphenethyl)-1,2,3,4-tetrahydroquinoline (2z):**

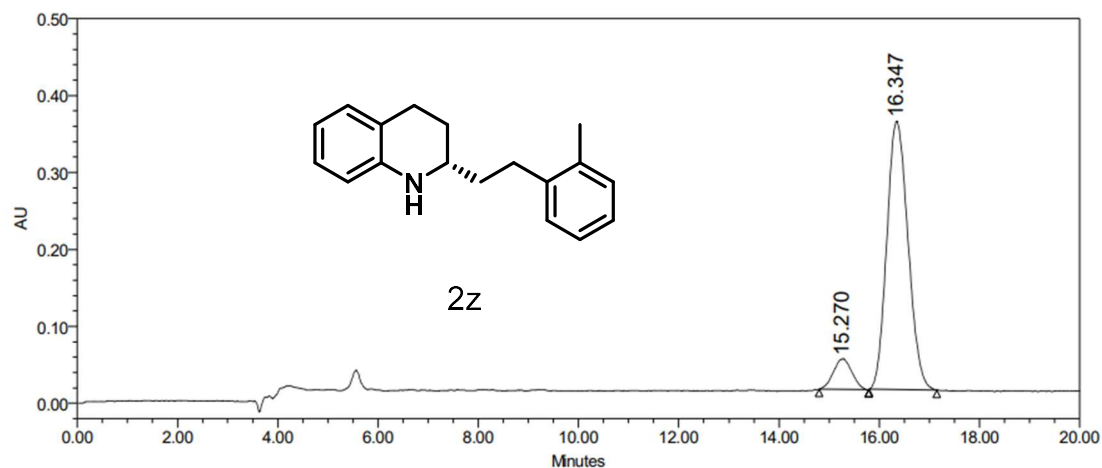

Channel: W2489 ChB; Processed Channel: W2489 ChB 254nm; Result Id: 3930; Processing Method: 0

**Processed Channel Descr.: W2489 ChB 254nm**

|   | Processed Channel Descr. | RT     | Area     | % Area | Height |
|---|--------------------------|--------|----------|--------|--------|
| 1 | W2489 ChB 254nm          | 15.270 | 1012265  | 8.99   | 39733  |
| 2 | W2489 ChB 254nm          | 16.347 | 10247460 | 91.01  | 348643 |

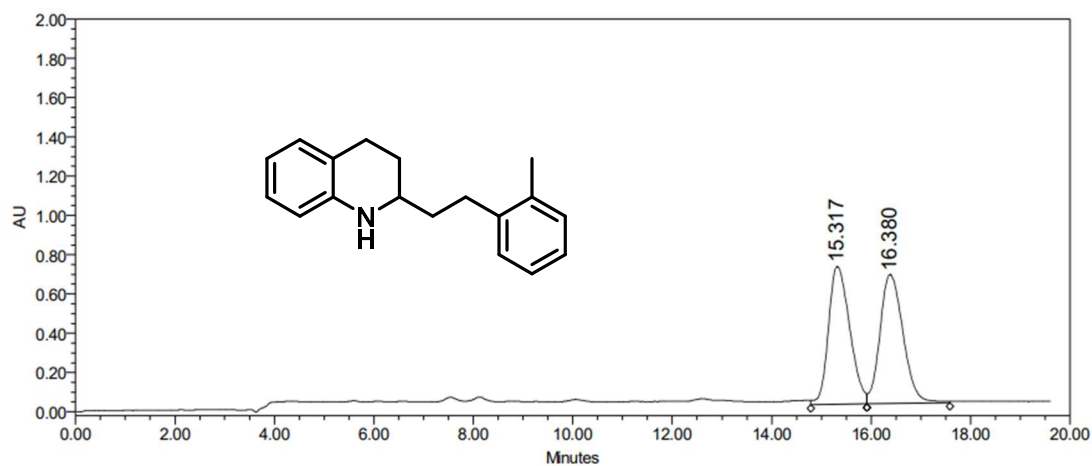

Channel: W2489 ChB; Processed Channel: W2489 ChB 254nm; Result Id: 3926; Processing Method: 0

**Processed Channel Descr.: W2489 ChB 254nm**

|   | Processed Channel Descr. | RT     | Area     | % Area | Height |
|---|--------------------------|--------|----------|--------|--------|
| 1 | W2489 ChB 254nm          | 15.317 | 20805752 | 49.49  | 700908 |
| 2 | W2489 ChB 254nm          | 16.380 | 21232479 | 50.51  | 655803 |

**(S)-2-(3,4-dimethoxyphenethyl)-1,2,3,4-tetrahydroquinoline (2aa):**

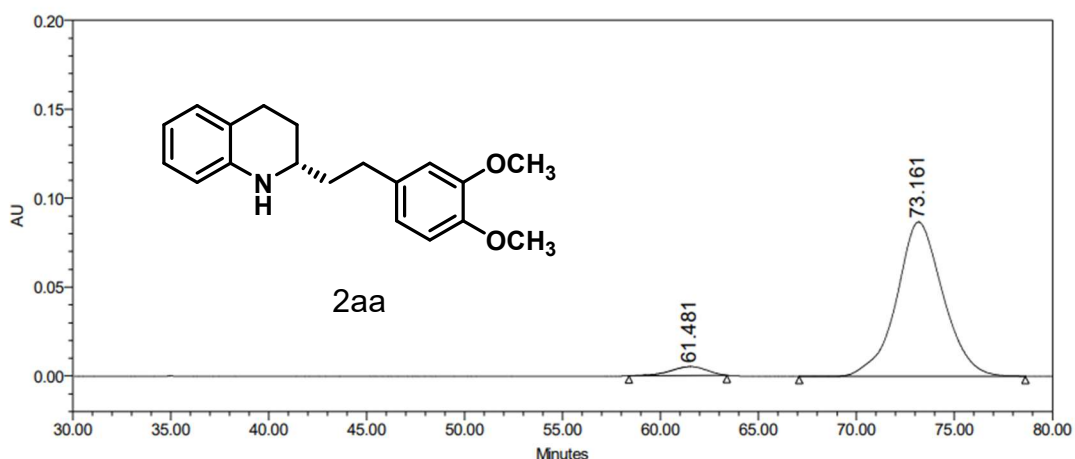

Channel: W2489 ChB; Processed Channel: W2489 ChB 254nm; Result Id: 3885; Processing Method: 0

**Processed Channel Descr.: W2489 ChB 254nm**

|   | Processed Channel Descr. | RT     | Area     | % Area | Height |
|---|--------------------------|--------|----------|--------|--------|
| 1 | W2489 ChB 254nm          | 61.481 | 646280   | 4.33   | 5052   |
| 2 | W2489 ChB 254nm          | 73.161 | 14291265 | 95.67  | 86766  |

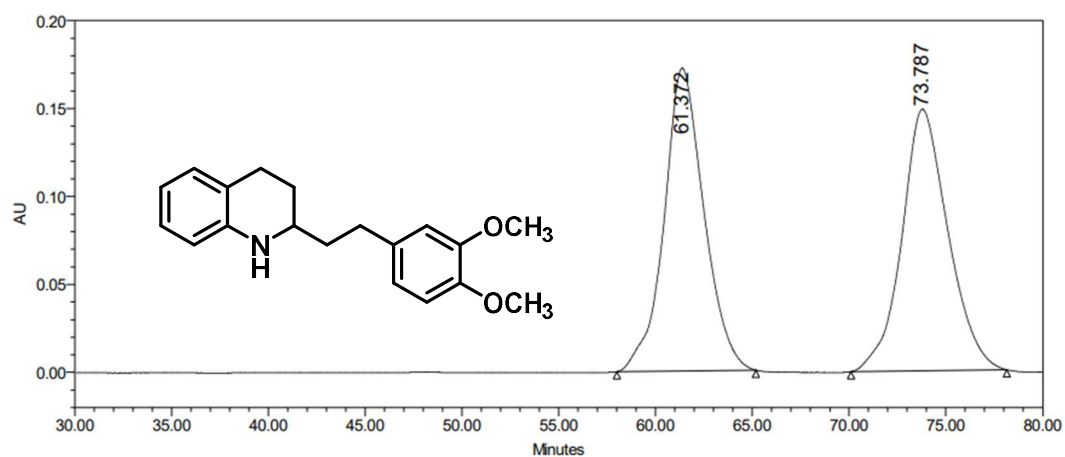

Channel: W2489 ChB; Processed Channel: W2489 ChB 254nm; Result Id: 3888; Processing Method: 0

**Processed Channel Descr.: W2489 ChB 254nm**

|   | Processed Channel Descr. | RT     | Area     | % Area | Height |
|---|--------------------------|--------|----------|--------|--------|
| 1 | W2489 ChB 254nm          | 61.372 | 24696468 | 49.96  | 172228 |
| 2 | W2489 ChB 254nm          | 73.787 | 24738601 | 50.04  | 148647 |

**(S)-2-(2-(naphthalen-2-yl)ethyl)-1,2,3,4-tetrahydroquinoline (2ab):**

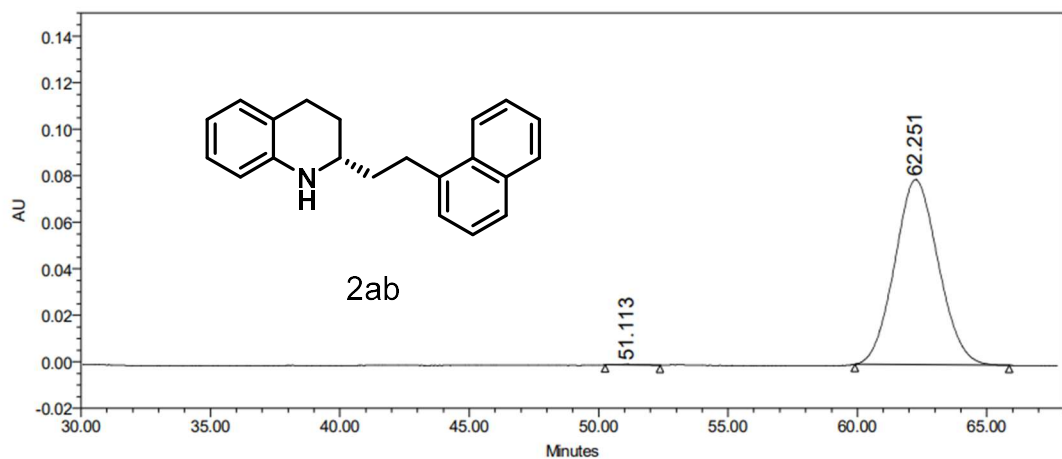

Channel: W2489 ChA; Processed Channel: W2489 ChA 254nm; Result Id: 3899; Processing Method: 0

**Processed Channel Descr.: W2489 ChA 254nm**

|   | Processed Channel Descr. | RT     | Area    | % Area | Height |
|---|--------------------------|--------|---------|--------|--------|
| 1 | W2489 ChA 254nm          | 51.113 | 15745   | 0.17   | 305    |
| 2 | W2489 ChA 254nm          | 62.251 | 9345323 | 99.83  | 79613  |

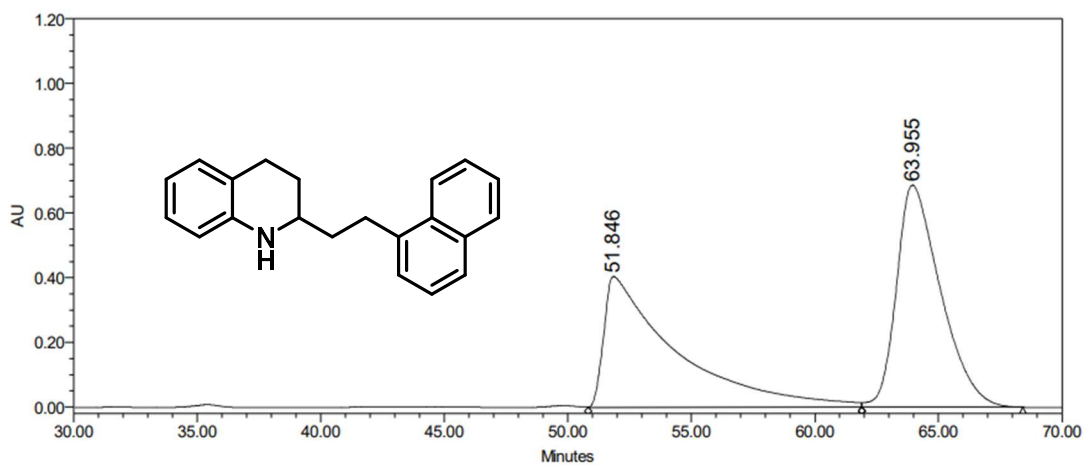

Channel: W2489 ChA; Processed Channel: W2489 ChA 254nm; Result Id: 3896; Processing Method: 0

**Processed Channel Descr.: W2489 ChA 254nm**

|   | Processed Channel Descr. | RT     | Area     | % Area | Height |
|---|--------------------------|--------|----------|--------|--------|
| 1 | W2489 ChA 254nm          | 51.846 | 81586997 | 48.86  | 404708 |
| 2 | W2489 ChA 254nm          | 63.955 | 85378506 | 51.14  | 686612 |

**(S)-2-(but-3-en-1-yl)-1,2,3,4-tetrahydroquinoline (2ac):**

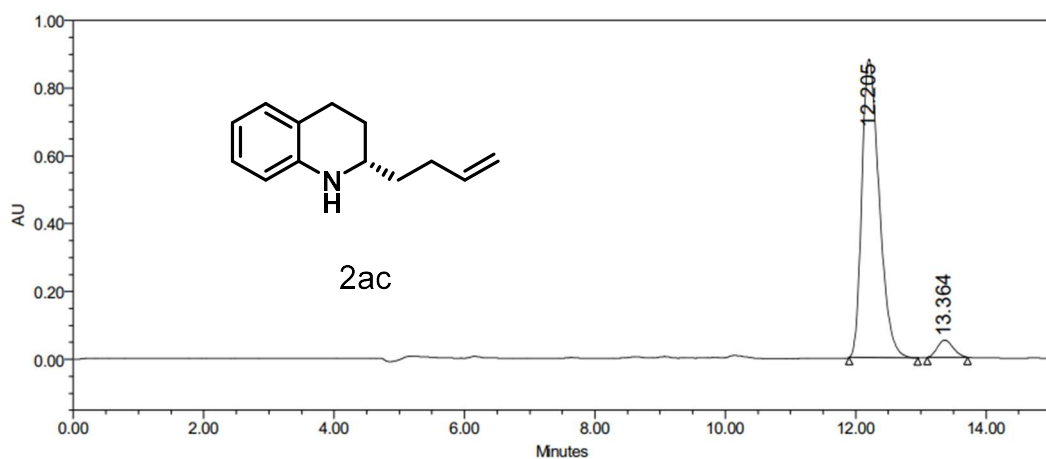

Channel: W2489 ChA; Processed Channel: W2489 ChA 254nm; Result Id: 3951; Processing Method: 0

**Processed Channel Descr.: W2489 ChA 254nm**

|   | Processed Channel Descr. | RT     | Area     | % Area | Height |
|---|--------------------------|--------|----------|--------|--------|
| 1 | W2489 ChA 254nm          | 12.205 | 16218217 | 95.03  | 880197 |
| 2 | W2489 ChA 254nm          | 13.364 | 848145   | 4.97   | 50766  |

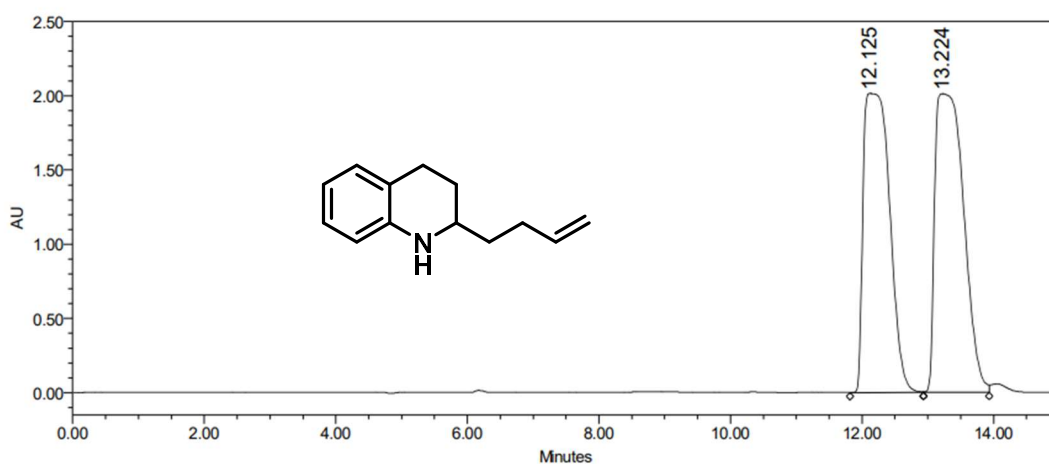

Channel: W2489 ChA; Processed Channel: W2489 ChA 254nm; Result Id: 3955; Processing Method: 0

**Processed Channel Descr.: W2489 ChA 254nm**

|   | Processed Channel Descr. | RT     | Area     | % Area | Height  |
|---|--------------------------|--------|----------|--------|---------|
| 1 | W2489 ChA 254nm          | 12.125 | 55903168 | 47.78  | 2014052 |
| 2 | W2489 ChA 254nm          | 13.224 | 61103724 | 52.22  | 2011327 |

**(S,E)-2-(4-phenylbut-3-en-1-yl)-1,2,3,4-tetrahydroquinoline (2ad):**

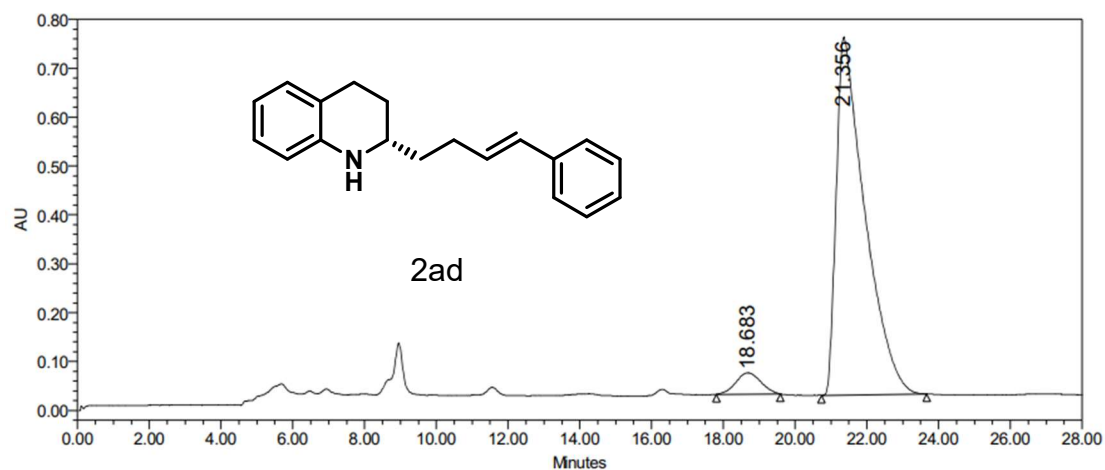

Channel: W2489 ChA; Processed Channel: W2489 ChA 254nm; Result Id: 3936; Processing Method: 0

**Processed Channel Descr.: W2489 ChA 254nm**

|   | Processed Channel Descr. | RT     | Area     | % Area | Height |
|---|--------------------------|--------|----------|--------|--------|
| 1 | W2489 ChA 254nm          | 18.683 | 2119116  | 4.99   | 43620  |
| 2 | W2489 ChA 254nm          | 21.356 | 40374471 | 95.01  | 731663 |

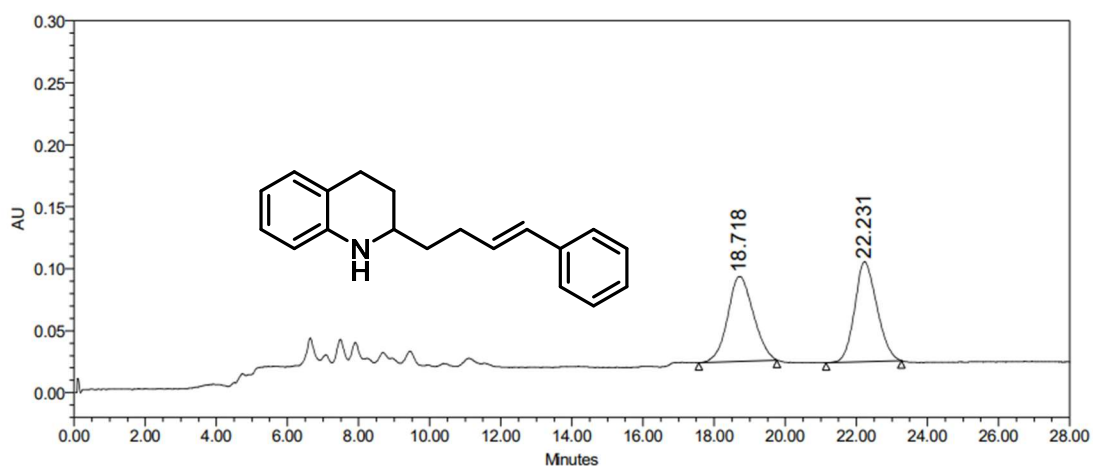

Channel: W2489 ChA; Processed Channel: W2489 ChA 254nm; Result Id: 3933; Processing Method: 0

**Processed Channel Descr.: W2489 ChA 254nm**

|   | Processed Channel Descr. | RT     | Area    | % Area | Height |
|---|--------------------------|--------|---------|--------|--------|
| 1 | W2489 ChA 254nm          | 18.718 | 3432753 | 49.45  | 68348  |
| 2 | W2489 ChA 254nm          | 22.231 | 3509801 | 50.55  | 80467  |



**(S)-2-(pent-4-yn-1-yl)-1,2,3,4-tetrahydroquinoline (2ae):**

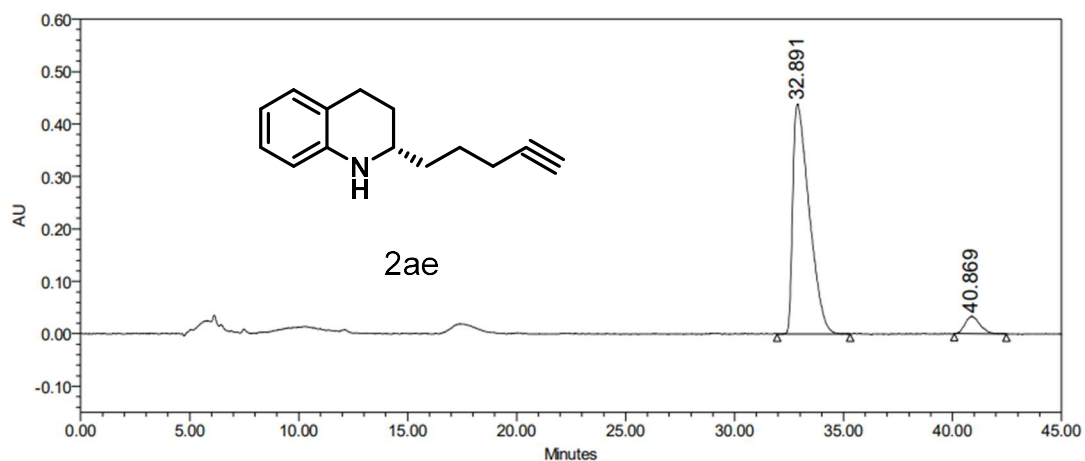

Channel: W2489 ChA; Processed Channel: W2489 ChA 254nm; Result Id: 3945; Processing Method: 0

**Processed Channel Descr.: W2489 ChA 254nm**

|   | Processed Channel Descr. | RT     | Area     | % Area | Height |
|---|--------------------------|--------|----------|--------|--------|
| 1 | W2489 ChA 254nm          | 32.891 | 22958347 | 93.50  | 438248 |
| 2 | W2489 ChA 254nm          | 40.869 | 1595273  | 6.50   | 32954  |

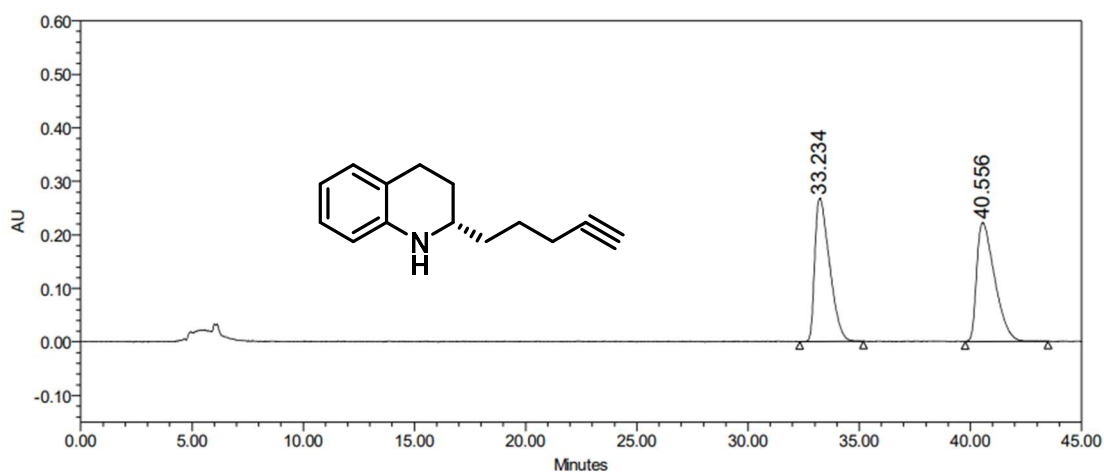

Channel: W2489 ChA; Processed Channel: W2489 ChA 254nm; Result Id: 3949; Processing Method: 0

**Processed Channel Descr.: W2489 ChA 254nm**

|   | Processed Channel Descr. | RT     | Area     | % Area | Height |
|---|--------------------------|--------|----------|--------|--------|
| 1 | W2489 ChA 254nm          | 33.234 | 12322293 | 49.82  | 267131 |
| 2 | W2489 ChA 254nm          | 40.556 | 12413644 | 50.18  | 221678 |



## 2,3-dimethyl-1,2,3,4-tetrahydro-quinoline (2af):

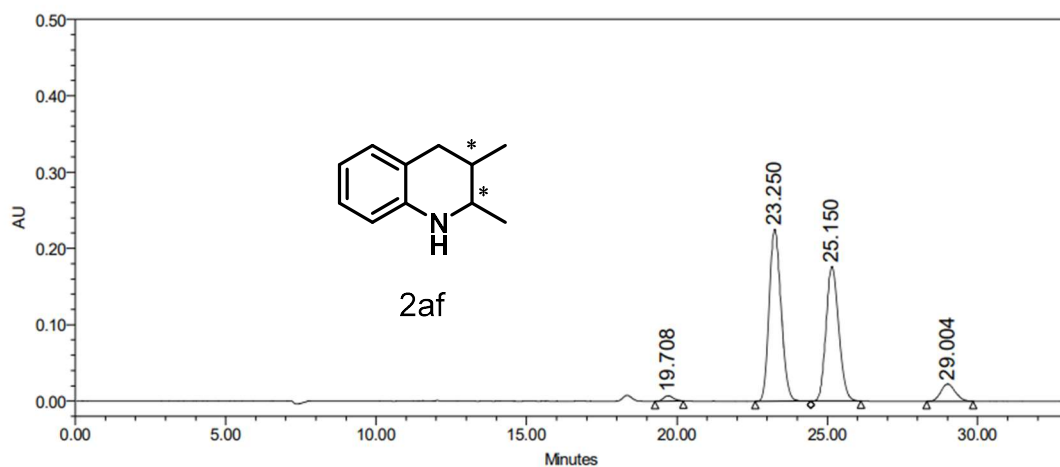

Channel: W2489 ChA; Processed Channel: W2489 ChA 254nm; Result Id: 3917; Processing Method: C

### Processed Channel Descr.: W2489 ChA 254nm

|   | Processed Channel Descr. | RT     | Area    | % Area | Height |
|---|--------------------------|--------|---------|--------|--------|
| 1 | W2489 ChA 254nm          | 19.708 | 155456  | 1.28   | 6958   |
| 2 | W2489 ChA 254nm          | 23.250 | 6097192 | 50.18  | 225350 |
| 3 | W2489 ChA 254nm          | 25.150 | 5158348 | 42.45  | 176185 |
| 4 | W2489 ChA 254nm          | 29.004 | 739403  | 6.09   | 22527  |

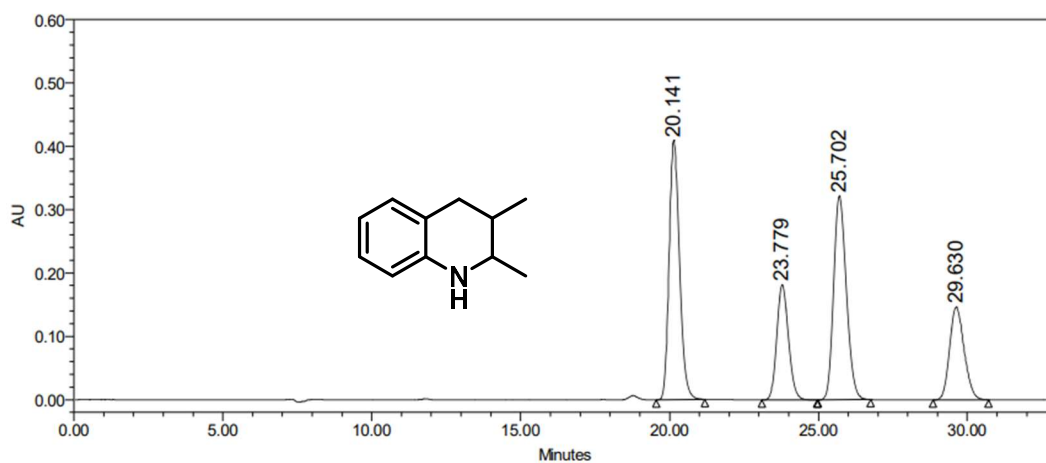

Channel: W2489 ChA; Processed Channel: W2489 ChA 254nm; Result Id: 3914; Processing Method: C

### Processed Channel Descr.: W2489 ChA 254nm

|   | Processed Channel Descr. | RT     | Area    | % Area | Height |
|---|--------------------------|--------|---------|--------|--------|
| 1 | W2489 ChA 254nm          | 20.141 | 9785191 | 33.33  | 409613 |
| 2 | W2489 ChA 254nm          | 23.779 | 4990549 | 17.00  | 181812 |
| 3 | W2489 ChA 254nm          | 25.702 | 9634002 | 32.81  | 321502 |
| 4 | W2489 ChA 254nm          | 29.630 | 4949149 | 16.86  | 146274 |

**(S)-2-(3,4-dimethoxyphenethyl)-1-methyl-1,2,3,4-tetrahydroquinoline (3aa):**

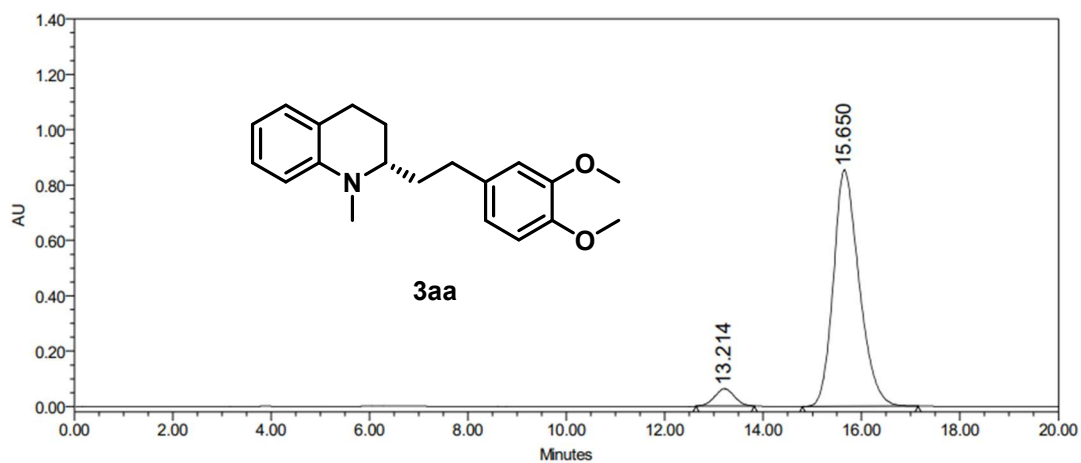

Channel: W2489 ChA; Processed Channel: W2489 ChA 254nm; Result Id: 3876; Processing Method: 0

**Processed Channel Descr.: W2489 ChA 254nm**

|   | Processed Channel Descr. | RT     | Area     | % Area | Height |
|---|--------------------------|--------|----------|--------|--------|
| 1 | W2489 ChA 254nm          | 13.214 | 1757459  | 5.35   | 62760  |
| 2 | W2489 ChA 254nm          | 15.650 | 31079505 | 94.65  | 853699 |

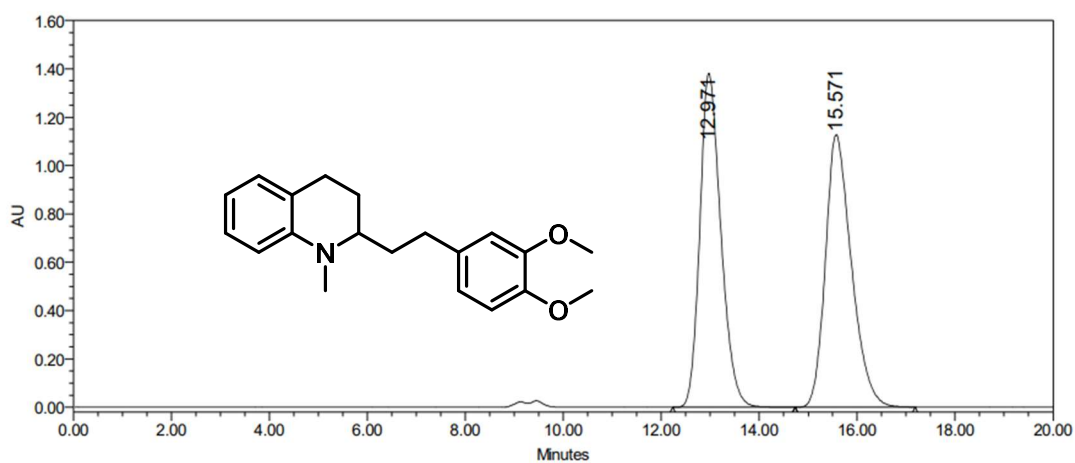

Channel: W2489 ChA; Processed Channel: W2489 ChA 254nm; Result Id: 3879; Processing Method: 0

**Processed Channel Descr.: W2489 ChA 254nm**

|   | Processed Channel Descr. | RT     | Area     | % Area | Height  |
|---|--------------------------|--------|----------|--------|---------|
| 1 | W2489 ChA 254nm          | 12.971 | 41144753 | 49.74  | 1380611 |
| 2 | W2489 ChA 254nm          | 15.571 | 41580684 | 50.26  | 1125968 |
